# Supplementary material for: Rh(iii)-Catalyzed ortho C–H functionalization of aromatic amides with bis(phenylsulfonyl)diazomethane and α-diazosulfones
Source: Royal Society of Chemistry journal article supplement (doi:10.1039/d1ob02380b), 2022-01-01

## Supporting information

### **Rh(III)-catalyzed *ortho* C–H functionalization of aromatic amides with bis(phenylsulfonyl)diazomethane and $\alpha$ -diazosulfones**

*Lei Chen, Xiao-can Su, Rui-jun Peng, Xue-jing Zhang, Ming Yan\**

Guangdong Provincial Key Laboratory of Chiral Molecules and Drug Discovery, School of  
Pharmaceutical Sciences, Sun Yat-sen University, Guangzhou 510006, China

*E-mail: yanming@mail.sysu.edu.cn*

|                                                                    |            |
|--------------------------------------------------------------------|------------|
| <b>1. General information.....</b>                                 | <b>S2</b>  |
| <b>2. General procedure for the preparation of substrates.....</b> | <b>S3</b>  |
| <b>3. General experimental procedure.....</b>                      | <b>S5</b>  |
| <b>4. Transformations of products.....</b>                         | <b>S7</b>  |
| <b>5. Control experiments.....</b>                                 | <b>S10</b> |
| <b>6. Characterization data for products.....</b>                  | <b>S12</b> |
| <b>7. References.....</b>                                          | <b>S23</b> |
| <b>8. NMR spectra of products.....</b>                             | <b>S24</b> |

## 1. General Information

$^1\text{H}$  NMR and  $^{13}\text{C}$  NMR spectra were recorded on Bruker AVANCE 400 MHz or 500 MHz spectrometer. Chemical shifts of protons are reported in parts per million downfield from tetramethylsilane. Chemical shifts of carbon are referenced to the center line of a triplet at 77.0 ppm of chloroform- $d_3$ , a heptet at 39.5 ppm of dimethyl sulfoxide- $d_6$  or a heptet at 29.8 ppm of acetone- $d_6$ . Peaks are labeled as single (s), broad singlet (bs), doublet (d), triplet (t), quartet (q), double doublet (dd), triple doublet (td), multiplet (m). Melting points were determined with a commercially available melting point apparatus. High-resolution mass spectra (HRMS) were acquired using an electron spray ionization time-of flight (ESI-TOF) mass spectrometer in positive mode. All reagents were used without further purification as received from commercial suppliers unless otherwise noted. All solvents were dried and distilled prior to use according to the standard protocols.

## 2. General procedure for the preparation of substrates

### 2.1 Preparation of amides 1 and 3 (taking 1a as an example)<sup>[1]</sup>

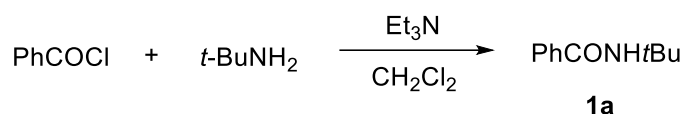

**Scheme S1.** Preparation of **1a**

To a stirring solution of *tert*-butylamine (1.26 mL, 12 mmol), Et<sub>3</sub>N (1.67 mL, 12 mmol) in CH<sub>2</sub>Cl<sub>2</sub> (20 mL) was added benzoyl chloride (1.16 mL, 10 mmol) at 0 °C. The reaction mixture was stirred at 0 °C for 10 minutes. Then, the reaction mixture was stirred at room temperature for 12 h. After the completion of the reaction, the reaction mixture was washed with saturated NaHCO<sub>3</sub> solution, saturated brine, and dried over MgSO<sub>4</sub>. The organic layer was concentrated and recrystallized by PE/DCM, affording the expected compound **1a** (1.17 g, 66%) as a yellow solid.

Amides **1i**<sup>[2]</sup> and **1j**<sup>[3]</sup> were prepared by according to the reported procedures.

### 2.2 Preparation of bis(phenylsulfonyl)diazomethane 2a<sup>[4]</sup>

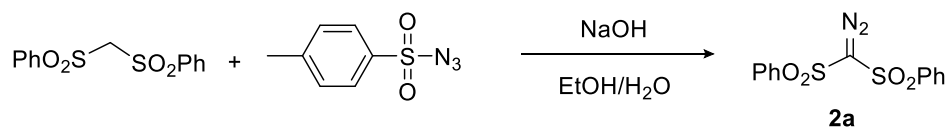

**Scheme S2.** Preparation of **2a**

To a stirring solution of 4-methylbenzenesulfonyl azide (5.3 g, 20.0 mmol, 75 % w/w in ethyl acetate,) in EtOH (30 mL) was added bis(phenylsulfonyl)methane (3.0 g, 10.0 mmol) in the mixture of EtOH (24 mL), H<sub>2</sub>O (16 mL), and NaOH (1.0 g, 12 mmol). The reaction mixture was stirred at -5 °C for 1 h. After the completion of the reaction, the reaction mixture was quenched by water (40 mL) and then extracted with CH<sub>2</sub>Cl<sub>2</sub> (3×50 mL). The combined organic phases were washed with saturated brine, dried over anhydrous Na<sub>2</sub>SO<sub>4</sub> and concentrated in vacuo. The crude product was purified by flash chromatography (petroleum ether/ethyl acetate = 12/1) to give the expected compound **2** (2.12 g, 66 %) as a yellow solid.

### 2.3 Preparation of 2b–2d (taking 2b as an example)<sup>[5]</sup>

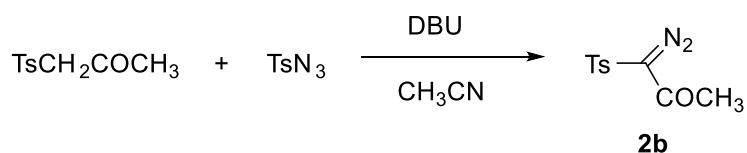

**Scheme S3.** Preparation of **2b**

To a stirring solution of 1-tosylpropan-2-one (2.12 g, 10 mmol) and tosyl azide (75 % w/w in ethyl acetate, 3.16g, 12 mmol) in acetonitrile (20 mL) was added DBU (1.80 mL, 12 mmol) at 0 °C. The reaction mixture was stirred for 3h. After the completion of the reaction, the reaction mixture was quenched by water (40 mL) and then extracted with CH<sub>2</sub>Cl<sub>2</sub> (3×50 mL). The combined organic phases were washed with saturated brine, dried over anhydrous Na<sub>2</sub>SO<sub>4</sub> and concentrated in vacuo. The crude product was purified by flash chromatography to give the expected compound **2b** (1.52 g, 64 %) as a yellow solid.

### 3. General experimental procedure

#### 3.1 Optimization of reaction conditions<sup>a</sup>

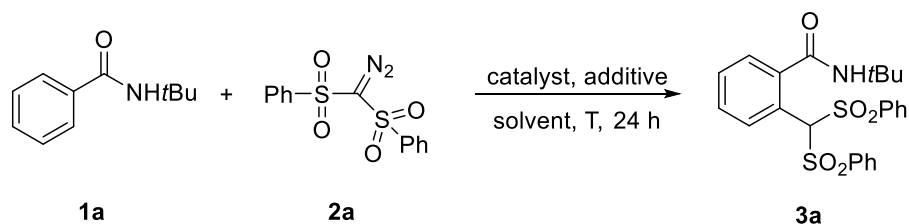

| Entry | Catalyst (mol%)                            | Additive (mol%)                    | solvent            | T (°C) | Yield <sup>b</sup> (%) |
|-------|--------------------------------------------|------------------------------------|--------------------|--------|------------------------|
| 1     | [Cp*IrCl <sub>2</sub> ] <sub>2</sub> (2)   | AgNTf <sub>2</sub> (8)/AgOAc (4)   | DCE                | 90     | 30                     |
| 2     | [Cp*RhCl <sub>2</sub> ] <sub>2</sub> (2.5) | AgSbF <sub>6</sub> (15)            | DCE                | 60     | 27                     |
| 3     | [Cp*RhCl <sub>2</sub> ] <sub>2</sub> (2.5) | AgOAc (15)                         | DCE                | 60     | 0                      |
| 4     | [Cp*RhCl <sub>2</sub> ] <sub>2</sub> (2.5) | AgNTf <sub>2</sub> (15)            | DCE                | 60     | 25                     |
| 5     | [Cp*RhCl <sub>2</sub> ] <sub>2</sub> (2.5) | AgOTf (15)                         | DCE                | 60     | 24                     |
| 6     | [Cp*RhCl <sub>2</sub> ] <sub>2</sub> (2.5) | AgBF <sub>4</sub> (15)             | DCE                | 60     | 20                     |
| 7     | [Cp*RhCl <sub>2</sub> ] <sub>2</sub> (2.5) | AgSbF <sub>6</sub> (15)/AgOAc (15) | DCE                | 60     | 88(83 <sup>c</sup> )   |
| 8     | [Cp*RhCl <sub>2</sub> ] <sub>2</sub> (2.5) | AgSbF <sub>6</sub> (15)/AgOAc (15) | DCE                | 90     | 68                     |
| 9     | [Cp*RhCl <sub>2</sub> ] <sub>2</sub> (2.5) | AgSbF <sub>6</sub> (15)/AgOAc (15) | DCE                | 30     | 85                     |
| 10    | [Cp*RhCl <sub>2</sub> ] <sub>2</sub> (2.5) | AgSbF <sub>6</sub> (15)/KOAc (15)  | DCE                | 60     | 0                      |
| 11    | [Cp*RhCl <sub>2</sub> ] <sub>2</sub> (2.5) | AgSbF <sub>6</sub> (15)/HOAc (15)  | DCE                | 60     | 13                     |
| 12    | [Cp*RhCl <sub>2</sub> ] <sub>2</sub> (2.5) | AgSbF <sub>6</sub> (10)/AgOAc (10) | DCE                | 60     | 86                     |
| 13    | [Cp*RhCl <sub>2</sub> ] <sub>2</sub> (2.5) | AgSbF <sub>6</sub> (20)/AgOAc (20) | DCE                | 60     | 85                     |
| 14    | [Cp*RhCl <sub>2</sub> ] <sub>2</sub> (2.5) | AgSbF <sub>6</sub> (15)/AgOAc (15) | DMSO               | 60     | 0                      |
| 15    | [Cp*RhCl <sub>2</sub> ] <sub>2</sub> (2.5) | AgSbF <sub>6</sub> (15)/AgOAc (15) | CH <sub>3</sub> CN | 60     | 0                      |
| 16    | [Cp*RhCl <sub>2</sub> ] <sub>2</sub> (2.5) | AgSbF <sub>6</sub> (15)/AgOAc (15) | MeOH               | 60     | 48                     |
| 17    | [Cp*RhCl <sub>2</sub> ] <sub>2</sub> (2.5) | AgSbF <sub>6</sub> (15)/AgOAc (15) | EA                 | 60     | 67                     |
| 18    | [Cp*RhCl <sub>2</sub> ] <sub>2</sub> (2.5) | AgSbF <sub>6</sub> (15)/AgOAc (15) | dioxane            | 60     | 71                     |
| 19    | [Cp*RhCl <sub>2</sub> ] <sub>2</sub> (2.5) | AgSbF <sub>6</sub> (15)/AgOAc (15) | toluene            | 60     | 0                      |

<sup>a</sup>Reaction conditions: **1a** (0.2 mmol), **2a** (0.24 mmol), solvent (2.0 mL), 24 h, under a N<sub>2</sub> atmosphere.

<sup>b</sup>Yield determined by <sup>1</sup>H NMR using 1, 3, 5-trimethoxybenzene as the internal standard.

<sup>c</sup>Isolated yield after column chromatography.

### 3.2 General procedure for the synthesis of 3, 5 and 6 (taking 3a as an example)

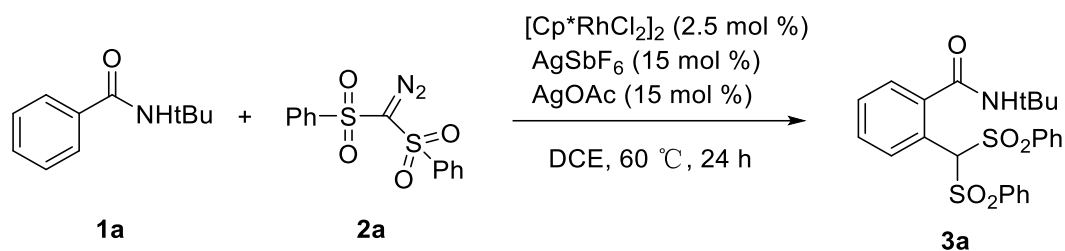

**Scheme S4.** Preparation of **3a**.

A 25 mL reaction tube equipped with a magnetic stirrer bar were charged with [Cp\*RhCl<sub>2</sub>]<sub>2</sub> (6.2 mg, 2.5 mol%), AgSbF<sub>6</sub> (20.6 mg, 15 mol%), AgOAc (10.0 mg, 15 mol%), **1a** (70.9 mg, 0.4 mmol), and DCE (2 mL). To the mixture was then added bis(phenylsulfonyl)diazomethane **2a** (154.7 mg, 0.48 mmol) in DCE (2 mL). The reaction mixture was stirred at 60 °C under a N<sub>2</sub> atmosphere for 24 h. The crude mixture was filtered through Celite and concentrated under reduced pressure. The residue was then purified by flash column chromatography (petroleum ether (PE): ethyl acetate (EA) = 4:1–2:1) to give the desired product **3a** (156.8 mg, 83%) as a white solid.

### 3.3 Gram Scale Experiment

A 50 mL flask equipped with a magnetic stirrer were charged with [Cp\*RhCl<sub>2</sub>]<sub>2</sub> (77.3 mg, 2.5 mol%), AgSbF<sub>6</sub> (257.7 mg, 15 mol%), AgOAc (125.2 mg, 15 mol%), **1a** (886.2 mg, 5.0 mmol), and DCE (10 mL). To the mixture was then added bis(phenylsulfonyl)diazomethane **2a** (1.93 g, 6.0 mmol) in DCE (10 mL). The reaction mixture was stirred at 60 °C under a N<sub>2</sub> atmosphere for 24 h. The crude mixture was filtered through Celite and concentrated under reduced pressure. The residue was then purified by flash column chromatography to give the desired product **3a** (1.72 g, 73%) as a white solid.

## 4. Transformations of products

### 4.1 Preparation of 7

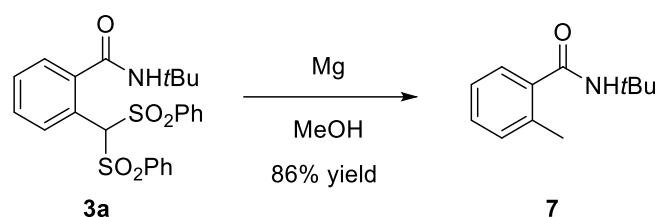

**Scheme S5.** Preparation of **7**.

To a 25 mL flask equipped with a magnetic stirrer were added **3a** (94.3 mg, 0.2 mmol), freshly activated Mg turnings (580 mg, 20 mmol, 100 equiv), and anhydrous MeOH (10 mL) under a N<sub>2</sub> atmosphere. The reaction mixture was stirred at 50 °C for 2 h. Filtrating the reaction mixture through a short pad of silica gel and concentrating the filtrate gave the crude product, which was purified by flash chromatography to give the expected compound **7** (30.6 mg, 86%) as a white solid.

### 4.2 Preparation of 8

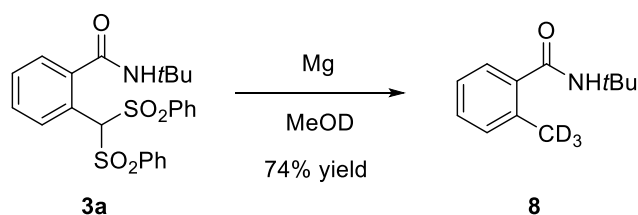

**Scheme S6.** Preparation of **8**.

To a 25 mL flask equipped with a magnetic stirrer were added **3a** (94.3 mg, 0.2 mmol), freshly activated Mg turnings (580 mg, 20 mmol, 100 equiv.), and anhydrous MeOD (10 mL) under a N<sub>2</sub> atmosphere. The reaction mixture was stirred at 60 °C for 12 h. Filtrating the reaction mixture through a short pad of silica gel and concentrating the filtrate gave the crude product, which was purified by flash chromatography to give the expected compound **8** (28.9 mg, 74%) as a white solid.

### 4.3 Preparation of 9, 10 and 11

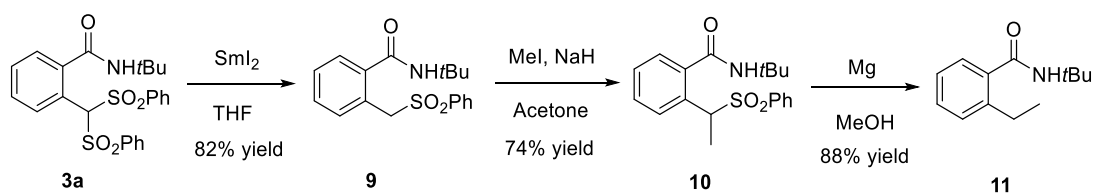

**Scheme S7.** Preparation of **9**, **10** and **11**.

### (1) Preparation of 9

To a 50 mL flask equipped with a magnetic stirrer were added HMPA (1 mL) and SmI<sub>2</sub> (0.1 mol/L in THF, 20 mL, 20 equiv) under a N<sub>2</sub> atmosphere. After stirring for 10 minutes, **3a** (94.3 mg, 0.2 mmol) in THF (5 mL) was added dropwise. After stirring for 2 h at room temperature, the reaction was quenched with saturated NaHCO<sub>3</sub> solution (30 mL) and extracted with CH<sub>2</sub>Cl<sub>2</sub> (2 × 30 mL). The combined organic phase was concentrated in vacuo. The crude product was purified by flash chromatography to give the expected compound **9** (54.4 mg, 82%) as a white solid.

### (2) Preparation of 10

To a 25 mL reaction tube equipped with a magnetic stirrer were added **8** (66.3 mg, 0.2 mmol), NaH (60% dispersion in mineral oil, 8 mg, 0.2 mmol), and CH<sub>3</sub>COCH<sub>3</sub> (1 mL) under an air atmosphere. After stirring for 10 minutes, CH<sub>3</sub>I (12.5 μL, 0.2 mmol) in CH<sub>3</sub>COCH<sub>3</sub> (1 mL) was added to the mixture. The reaction mixture was stirred at room temperature for 12 h, then quenched with water (20 mL) and extracted with CH<sub>2</sub>Cl<sub>2</sub> (3×20 mL). The combined organic phase was concentrated in vacuo. The crude product was purified by flash chromatography to give the expected compound **10** (51.2 mg, 74%) as a white solid.

### (3) Preparation of 11

To a 25 mL flask equipped with a magnetic stirrer were added **10** (34.5 mg, 0.1 mmol), freshly activated Mg turnings (120 mg, 5 mmol, 50 equiv), and anhydrous MeOH (5 mL) under a N<sub>2</sub> atmosphere. The reaction mixture was stirred at 50 °C for 2 h. Filtrating the reaction mixture through a short pad of silica gel and concentrating the filtrate gave the crude product, which was purified by flash chromatography to give the expected compound **11** (18.0 mg, 88%) as a white solid.

## 4.4 Preparation of 12

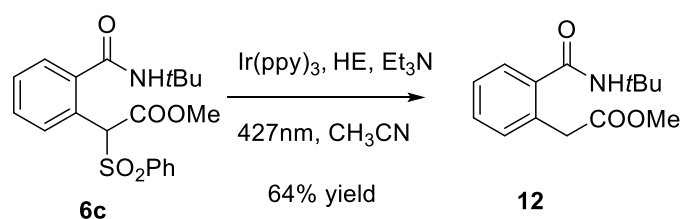

**Scheme S8** Preparation of **12**.

To a 20 mL quartz tube equipped with a magnetic stirrer were added **6c** (38.9 mg, 0.1 mmol), Ir(ppy)<sub>3</sub> (1.6 mg, 0.0025 mmol, 0.025 equiv), Et<sub>3</sub>N (139.0 μL, 1.0 mmol, 10 equiv), Hantzsch ester (50.7 mg, 0.2



mmol) and anhydrous MeCN (2 mL) under a N<sub>2</sub> atmosphere. The reaction mixture was stirred at room temperature under irradiation with Blue LED (427 nm, 40W) for 24 h. The reaction mixture then quenched with water (10 mL) and extracted with CH<sub>2</sub>Cl<sub>2</sub> (3×10 mL). The combined organic phase was concentrated in vacuo. The crude product was purified by flash chromatography to give the expected compound **12** (16.0 mg, 64%) as a colorless oil.

## 5. Control experiments

### 5.1 Electronic effect

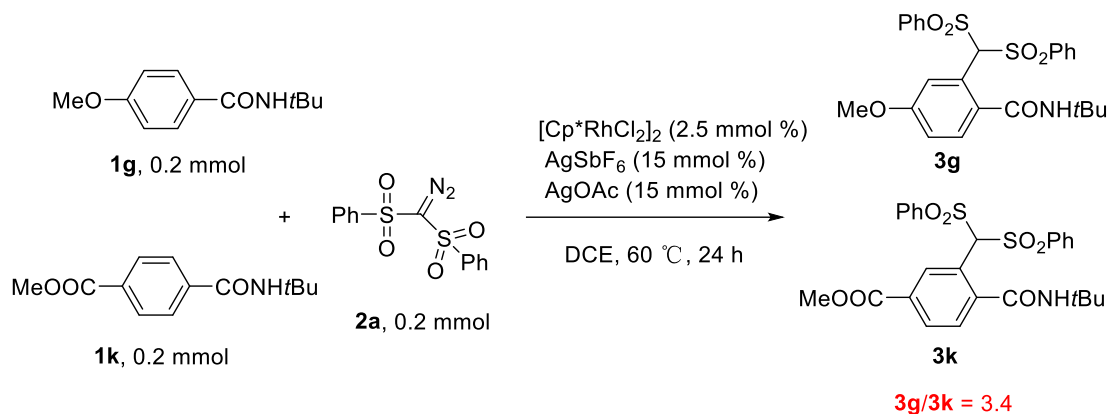

**Scheme S9** Competition experiment of **1g**, **1k** with **2a**.

A 25 mL reaction tube equipped with a magnetic stirrer bar were charged with [Cp\*RhCl<sub>2</sub>]<sub>2</sub> (3.1 mg, 2.5 mol %), AgSbF<sub>6</sub> (10.3 mg, 15 mol %), AgOAc (5.0 mg, 15 mol%), **1g** (41.5 mg, 0.2 mmol), **1k** (47.1 mg, 0.2 mmol), and DCE (1 mL). To the mixture was added bis(phenylsulfonyl)diazomethane **2a** (64.5 mg, 0.2 mmol) in DCE (1 mL). The reaction mixture was stirred at 60 °C under a N<sub>2</sub> atmosphere for 24 h. The crude mixture was filtered through Celite and concentrated in vacuo. The residue was then purified by flash column chromatography. The mixture of **3g** and **3k** were combinedly isolated. The ratio of **3g** and **3k** was determined to be 3.4: 1 by <sup>1</sup>H NMR analysis.

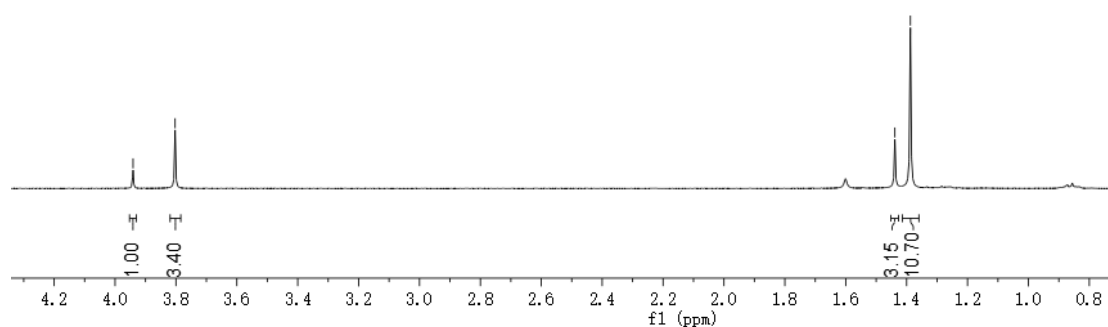

**Figure S1** <sup>1</sup>H NMR spectra of the mixture of **3g** and **3k**.

## 5.2 Determination of KIE from Intermolecular Competition Experiment

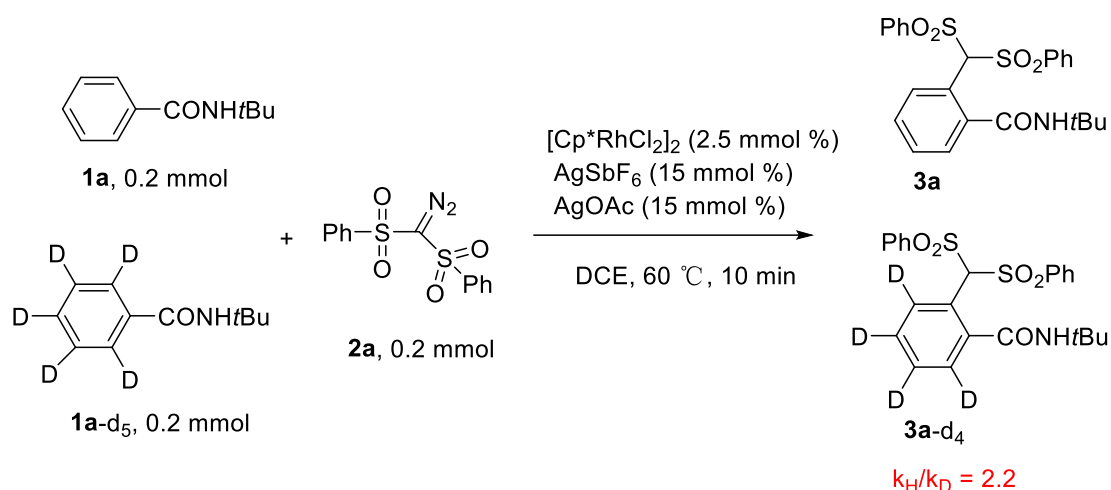

**Scheme S10** Intermolecular competition experiment of **1a**, **1a-d<sub>5</sub>** with **2a**.

A 25 mL reaction tube equipped with a magnetic stirrer bar were charged with [Cp\*RhCl<sub>2</sub>]<sub>2</sub> (3.1 mg, 2.5 mol %), AgSbF<sub>6</sub> (10.3 mg, 15 mol %), AgOAc (5.0 mg, 15 mol%), **1a** (35.4 mg, 0.2 mmol), **1a-d<sub>5</sub>** (36.4 mg, 0.2 mmol), and DCE (1 mL). To the mixture was added bis(phenylsulfonyl)diazomethane **2a** (64.5 mg, 0.2 mmol) in DCE (1 mL). The reaction mixture was stirred at 60 °C under a N<sub>2</sub> atmosphere for 10 min. The crude mixture was filtered through Celite and concentrated under reduced pressure. The residue was then purified by flash column chromatography to afford the mixture of **3a** and **3a-d<sub>4</sub>**. The ratio of **3a** and **3a-d<sub>4</sub>** was determined to be 0.69: 0.31 by <sup>1</sup>H NMR analysis. The KIE value is equal to 2.2.

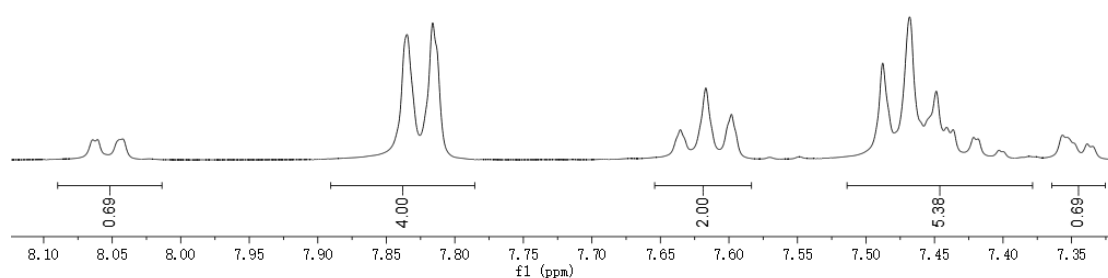

**Figure S2** <sup>1</sup>H NMR spectra of the mixture of **3a** and **3a-d<sub>4</sub>**.

## 6. Characterization data for products

### 2-(Bis(phenylsulfonyl)methyl)-*N*-(*tert*-butyl)benzamide (3a)

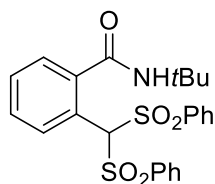

White solid (156.8 mg, 83% yield); **Mp**: 172–174 °C; **<sup>1</sup>H NMR** (400 MHz, CDCl<sub>3</sub>)  $\delta$  8.03 (d,  $J$  = 7.4 Hz, 1H), 7.81 (d,  $J$  = 7.7 Hz, 4H), 7.60 (t,  $J$  = 7.4 Hz, 2H), 7.43 (m, 6H), 7.33 (d,  $J$  = 7.1 Hz, 1H), 7.09 (s, 1H), 5.75 (s, 1H), 1.41 (s, 9H); **<sup>13</sup>C NMR** (101 MHz, CDCl<sub>3</sub>)  $\delta$  167.5, 139.3, 138.4, 134.3, 131.5, 130.4, 129.9, 129.4, 128.8, 127.3, 123.4, 81.3, 52.1, 28.5; **HRMS** (ESI): calculated for C<sub>24</sub>H<sub>26</sub>NO<sub>5</sub>S<sub>2</sub> [M+H]<sup>+</sup>: 472.1247, found: 472.1247.

### 2-(Bis(phenylsulfonyl)methyl)-*N*-(*tert*-butyl)-4-methylbenzamide (3c)

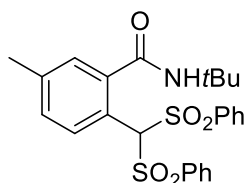

White solid (97.0 mg, 50% yield); **Mp**: 176–178 °C; **<sup>1</sup>H NMR** (400 MHz, CDCl<sub>3</sub>)  $\delta$  7.89 (d,  $J$  = 8.0 Hz, 1H), 7.80 (d,  $J$  = 7.7 Hz, 4H), 7.59 (t,  $J$  = 7.3 Hz, 2H), 7.44 (t,  $J$  = 7.6 Hz, 4H), 7.24 (d,  $J$  = 8.0 Hz, 1H), 7.12 (s, 1H), 7.02 (s, 1H), 5.75 (s, 1H), 2.34 (s, 3H), 1.40 (s, 9H); **<sup>13</sup>C NMR** (101 MHz, CDCl<sub>3</sub>)  $\delta$  167.6, 140.9, 139.3, 138.5, 134.2, 131.3, 130.6, 129.4, 128.8, 128.0, 120.1, 81.4, 52.0, 28.5, 21.2; **HRMS** (ESI): calculated for C<sub>25</sub>H<sub>28</sub>NO<sub>5</sub>S<sub>2</sub> [M+H]<sup>+</sup>: 486.1403, found: 486.1403.

### 2-(Bis(phenylsulfonyl)methyl)-*N*-(*tert*-butyl)-4-methylbenzamide (3d)

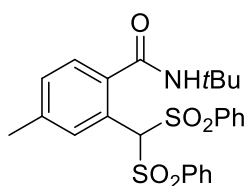

White solid (187.0 mg, 96% yield); **Mp**: 166–168 °C; **<sup>1</sup>H NMR** (400 MHz, CDCl<sub>3</sub>)  $\delta$  7.80 (d,  $J$  = 7.8 Hz, 4H), 7.74 (s, 1H), 7.59 (t,  $J$  = 7.3 Hz, 2H), 7.45 (t,  $J$  = 7.7 Hz, 4H), 7.27–7.15 (m, 3H), 5.71 (s, 1H), 2.34 (s, 3H), 1.39 (s, 9H); **<sup>13</sup>C NMR** (101 MHz, CDCl<sub>3</sub>)  $\delta$  167.7, 140.3, 138.5, 136.4, 134.2, 132.1, 130.9, 129.4, 128.7, 127.3, 123.4, 81.2, 51.9, 28.6, 21.4; **HRMS** (ESI): calculated for C<sub>25</sub>H<sub>28</sub>NO<sub>5</sub>S<sub>2</sub> [M+H]<sup>+</sup>: 486.1403, found: 486.1406.

**2-(Bis(phenylsulfonyl)methyl)-*N*-(*tert*-butyl)-4-*tert*-butyl benzamide (3e)**

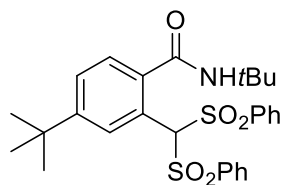

White solid (209.1 mg, 99% yield); **Mp:** 180–182 °C; **<sup>1</sup>H NMR** (400 MHz, CDCl<sub>3</sub>) δ 7.88 (d, *J* = 1.7 Hz, 1H), 7.82 (d, *J* = 7.5 Hz, 4H), 7.59 (t, *J* = 7.4 Hz, 2H), 7.45 (t, *J* = 7.8 Hz, 4H), 7.35 (dd, *J* = 8.1, 1.8 Hz, 1H), 7.27–7.23 (m, 1H), 7.17 (s, 1H), 5.81 (s, 1H), 1.43 (s, 9H), 1.25 (s, 9H); **<sup>13</sup>C NMR** (101 MHz, CDCl<sub>3</sub>) δ 167.6, 153.0, 138.3, 136.4, 134.2, 129.6, 128.8, 128.7, 127.2, 127.1, 123.1, 81.6, 52.0, 34.8, 30.8, 28.6; **HRMS** (ESI): calculated for C<sub>28</sub>H<sub>33</sub>NO<sub>5</sub>S<sub>2</sub>Na [M+Na]<sup>+</sup>: 550.1692, found: 550.1697.

**2-(Bis(phenylsulfonyl)methyl)-*N*-(*tert*-butyl)-4-phenylbenzamide (3f)**

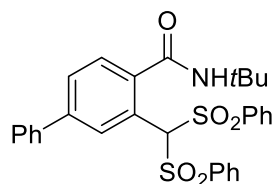

White solid (210.0 mg, 96% yield); **Mp:** 230–232 °C; **<sup>1</sup>H NMR** (400 MHz, Acetone-*d*<sub>6</sub>) δ 8.27 (d, *J* = 1.8 Hz, 1H), 7.87–7.78 (m, 5H), 7.76–7.69 (m, 3H), 7.64–7.51 (m, 9H), 7.45 (t, *J* = 7.3 Hz, 1H), 7.12 (s, 1H), 1.41 (s, 9H); **<sup>13</sup>C NMR** (101 MHz, Acetone-*d*<sub>6</sub>) δ 168.4, 142.8, 140.2, 139.9, 137.7, 135.2, 130.7, 130.0, 130.0, 129.9, 129.8, 129.2, 128.8, 127.7, 126.2, 81.4, 52.5, 28.8; **HRMS** (ESI): calculated for C<sub>30</sub>H<sub>30</sub>NO<sub>5</sub>S<sub>2</sub> [M+H]<sup>+</sup>: 548.1560, found: 548.1557.

**2-(Bis(phenylsulfonyl)methyl)-*N*-(*tert*-butyl)-4-methoxybenzamide (3g)**

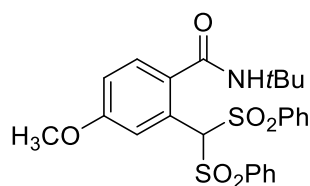

White solid (198.0 mg, 99% yield); **Mp:** 197–199°C; **<sup>1</sup>H NMR** (400 MHz, CDCl<sub>3</sub>) δ 7.83 (d, *J* = 7.8 Hz, 4H), 7.60 (t, *J* = 7.4 Hz, 2H), 7.53 (d, *J* = 2.3 Hz, 1H), 7.46 (t, *J* = 7.7 Hz, 4H), 7.37 (s, 1H), 7.29–7.24 (m, 1H), 6.89 (dd, *J* = 8.6, 2.4 Hz, 1H), 5.64 (s, 1H), 3.80 (s, 3H), 1.39 (s, 9H); **<sup>13</sup>C NMR** (101 MHz, CDCl<sub>3</sub>) δ 167.4, 160.2, 138.5, 134.2, 131.4, 129.4, 128.8, 128.8, 125.5, 116.6, 116.1, 80.7, 55.5, 51.9, 28.6; **HRMS** (ESI): calculated for C<sub>25</sub>H<sub>28</sub>NO<sub>6</sub>S<sub>2</sub> [M+H]<sup>+</sup>: 502.1353, found: 502.1352.

**2-(Bis(phenylsulfonyl)methyl)-*N*-(*tert*-butyl)-4-acetamidobenzamide (3h)**

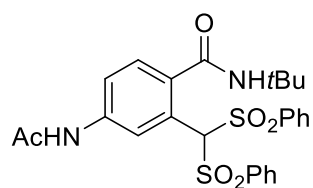

White solid (166.0 mg, 78% yield); **Mp**: 238–240 °C; **<sup>1</sup>H NMR** (400 MHz, Acetone-*d*<sub>6</sub>)  $\delta$  9.66 (s, 1H), 8.14 (dd, *J* = 8.6, 2.1 Hz, 1H), 7.88–7.82 (m, 2H), 7.76 (dd, *J* = 8.4, 1.1 Hz, 4H), 7.72–7.66 (m, 2H), 7.54 (t, *J* = 7.9 Hz, 4H), 7.44 (d, *J* = 8.6 Hz, 1H), 6.87 (s, 1H), 2.17 (s, 3H), 1.35 (s, 9H); **<sup>13</sup>C NMR** (101 MHz, Acetone-*d*<sub>6</sub>)  $\delta$  169.5, 168.2, 141.6, 140.4, 135.0, 133.1, 129.9, 129.8, 129.8, 126.3, 122.3, 120.6, 80.8, 52.2, 28.7, 24.3; **HRMS** (ESI): calculated for C<sub>26</sub>H<sub>28</sub>N<sub>2</sub>O<sub>6</sub>S<sub>2</sub>Na [M+Na]<sup>+</sup>: 551.1281, found: 551.1285.

**2-(Bis(phenylsulfonyl)methyl)-*N*-(*tert*-butyl)-4-hydroxybenzamide (3i)**

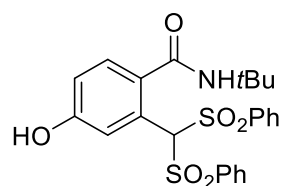

White solid (63.0 mg, 32% yield); **Mp**: 210–212 °C; **<sup>1</sup>H NMR** (400 MHz, Acetone-*d*<sub>6</sub>)  $\delta$  9.08 (s, 1H), 7.93 (s, 1H), 7.77 (d, *J* = 7.5 Hz, 4H), 7.70 (t, *J* = 7.1 Hz, 2H), 7.61–7.47 (m, 5H), 7.39 (d, *J* = 8.5 Hz, 1H), 6.86 (d, *J* = 8.2 Hz, 1H), 6.76 (s, 1H), 1.34 (s, 9H); **<sup>13</sup>C NMR** (101 MHz, Acetone-*d*<sub>6</sub>)  $\delta$  168.5, 159.2, 140.5, 135.0, 130.8, 130.2, 129.8, 127.4, 119.3, 117.2, 80.8, 52.1, 28.8; **HRMS** (ESI): calculated for C<sub>24</sub>H<sub>26</sub>NO<sub>6</sub>S<sub>2</sub> [M+H]<sup>+</sup>: 488.1196, found: 486.1202.

**2-(Bis(phenylsulfonyl)methyl)-*N*-(*tert*-butyl)-4-aminobenzamide (3j)**

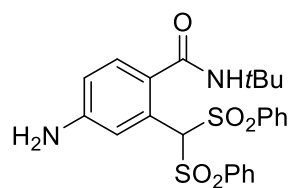

White solid (62.0 mg, 32% yield); **Mp**: 270–272 °C; **<sup>1</sup>H NMR** (500 MHz, Acetone-*d*<sub>6</sub>)  $\delta$  8.11 (s, 1H), 7.77 (d, *J* = 7.3 Hz, 4H), 7.67 (t, *J* = 7.5 Hz, 2H), 7.52 (t, *J* = 7.9 Hz, 4H), 7.31 (d, *J* = 2.4 Hz, 1H), 7.21 (d, *J* = 8.4 Hz, 1H), 6.63 (dd, *J* = 8.5, 2.4 Hz, 1H), 6.50 (s, 1H), 5.35 (s, 2H), 1.32 (s, 9H); **<sup>13</sup>C NMR** (126 MHz, Acetone-*d*<sub>6</sub>)  $\delta$  168.9, 150.8, 140.9, 134.8, 130.4, 129.7, 129.6, 127.1, 126.1, 117.6, 115.0, 80.6, 51.8, 28.9; **HRMS** (ESI): calculated for C<sub>24</sub>H<sub>27</sub>N<sub>2</sub>O<sub>5</sub>S<sub>2</sub> [M+H]<sup>+</sup>: 487.1356, found: 487.1359.

### Methyl 3-(bis(phenylsulfonyl)methyl)-4-(*tert*-butylcarbamoyl)benzoate (3k)

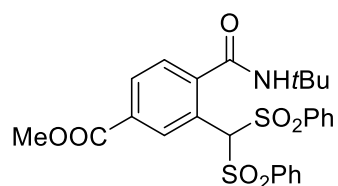

White solid (152.0 mg, 72% yield); **Mp**: 190–192 °C; **<sup>1</sup>H NMR** (400 MHz, CDCl<sub>3</sub>) δ 8.52 (s, 1H), 8.07 (d, *J* = 8.0 Hz, 1H), 7.81 (d, *J* = 7.9 Hz, 4H), 7.62 (t, *J* = 7.4 Hz, 2H), 7.47 (t, *J* = 7.8 Hz, 4H), 7.42 (d, *J* = 8.0 Hz, 1H), 6.96 (s, 1H), 5.88 (s, 1H), 3.94 (s, 3H), 1.44 (s, 9H); **<sup>13</sup>C NMR** (101 MHz, CDCl<sub>3</sub>) δ 166.7, 165.4, 143.1, 137.9, 134.5, 132.2, 131.5, 131.3, 129.5, 128.9, 127.5, 123.9, 81.3, 52.6, 52.4, 28.5; **HRMS** (ESI): calculated for C<sub>26</sub>H<sub>28</sub>NO<sub>7</sub>S<sub>2</sub> [M+H]<sup>+</sup>: 530.1302, found: 530.1302.

### 2-(Bis(phenylsulfonyl)methyl)-*N*-(*tert*-butyl)-4-(trifluoromethyl)benzamide (3l)

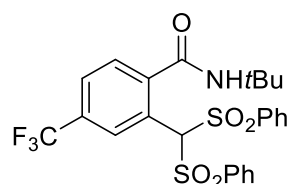

White solid (140.2 mg, 65% yield); **Mp**: 206–208 °C; **<sup>1</sup>H NMR** (400 MHz, CDCl<sub>3</sub>) δ 8.01 (s, 1H), 7.81 (d, *J* = 7.7 Hz, 4H), 7.64 (t, *J* = 7.4 Hz, 3H), 7.54–7.43 (m, 5H), 6.92 (s, 1H), 5.96 (s, 1H), 1.46 (s, 9H); **<sup>13</sup>C NMR** (101 MHz, CDCl<sub>3</sub>) δ 166.4, 142.7, 137.4, 134.7, 131.6 (q, *J*<sub>C-C-F</sub> = 33.7 Hz), 129.6, 129.0, 128.2 (q, *J*<sub>C-C-C-F</sub> = 4.0 Hz), 128.0, 127.1 (q, *J*<sub>C-C-C-F</sub> = 3.0 Hz), 124.6, 123.0 (q, *J*<sub>C-F</sub> = 273.7 Hz), 81.5, 52.6, 28.5; **<sup>19</sup>F NMR** (376 MHz, CDCl<sub>3</sub>) δ -63.12; **HRMS** (ESI): calculated for C<sub>25</sub>H<sub>25</sub>F<sub>3</sub>NO<sub>5</sub>S<sub>2</sub> [M+H]<sup>+</sup>: 540.1121, found: 540.1121.

### 2-(Bis(phenylsulfonyl)methyl)-*N*-(*tert*-butyl)-4-nitrobenzamide (3m)

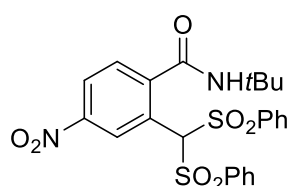

White solid (148.6 mg, 72% yield); **Mp**: 230–232 °C; **<sup>1</sup>H NMR** (400 MHz, CDCl<sub>3</sub>) δ 8.65 (d, *J* = 2.1 Hz, 1H), 8.22 (dd, *J* = 8.4, 2.1 Hz, 1H), 7.82 (d, *J* = 7.6 Hz, 4H), 7.66 (t, *J* = 7.5 Hz, 2H), 7.56–7.46 (m, 5H), 6.87 (s, 1H), 6.02 (s, 1H), 1.47 (s, 9H); **<sup>13</sup>C NMR** (101 MHz, CDCl<sub>3</sub>) δ 165.8, 147.8, 144.8, 137.3, 134.9, 129.5, 129.2, 128.5, 126.2, 125.5, 125.1, 81.2, 52.8, 28.5; **HRMS** (ESI): calculated for C<sub>24</sub>H<sub>25</sub>N<sub>2</sub>O<sub>7</sub>S<sub>2</sub> [M+H]<sup>+</sup>: 517.1098, found: 517.1098.

### 2-(Bis(phenylsulfonyl)methyl)-*N*-(*tert*-butyl)-4-chlorobenzamide (3n)

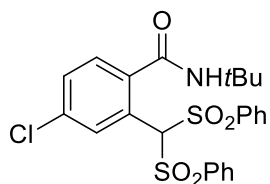

White solid (198.4 mg, 98% yield); **Mp**: 206–208 °C; **<sup>1</sup>H NMR** (400 MHz, CDCl<sub>3</sub>) δ 7.91 (d, *J* = 1.8 Hz, 1H), 7.81 (d, *J* = 7.6 Hz, 4H), 7.62 (t, *J* = 7.4 Hz, 2H), 7.48 (t, *J* = 7.8 Hz, 4H), 7.39–7.32 (m, 1H), 7.27 (d, *J* = 8.1 Hz, 1H), 7.08 (s, 1H), 5.79 (s, 1H), 1.40 (s, 9H); **<sup>13</sup>C NMR** (101 MHz, CDCl<sub>3</sub>) δ 166.7, 137.9, 137.6, 136.0, 134.5, 131.4, 130.4, 129.5, 128.9, 128.6, 125.4, 80.9, 52.3, 28.5; **HRMS** (ESI): calculated for C<sub>24</sub>H<sub>25</sub>ClNO<sub>5</sub>S<sub>2</sub> [M+H]<sup>+</sup>: 506.0857, found: 506.0856.

### 2-(Bis(phenylsulfonyl)methyl)-4-bromo-*N*-(*tert*-butyl)benzamide (3o)

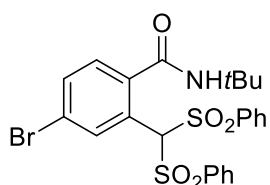

White solid (209.2 mg, 98% yield); **Mp**: 190–192 °C; **<sup>1</sup>H NMR** (400 MHz, CDCl<sub>3</sub>) δ 8.00 (d, *J* = 1.8 Hz, 1H), 7.82 (d, *J* = 7.4 Hz, 4H), 7.63 (t, *J* = 7.5 Hz, 2H), 7.55–7.46 (m, 5H), 7.20 (d, *J* = 8.2 Hz, 1H), 7.00 (s, 1H), 5.81 (s, 1H), 1.42 (s, 9H); **<sup>13</sup>C NMR** (101 MHz, CDCl<sub>3</sub>) δ 166.7, 138.0, 137.8, 134.6, 134.2, 133.4, 129.5, 128.9, 128.7, 125.5, 124.0, 80.3, 52.3, 28.5; **HRMS** (ESI): calculated for C<sub>24</sub>H<sub>25</sub>BrNO<sub>5</sub>S<sub>2</sub> [M+H]<sup>+</sup>: 550.0352, found: 550.0352.

### 3-(Bis(phenylsulfonyl)methyl)-*N*-(*tert*-butyl)-2-naphthamide (3p)

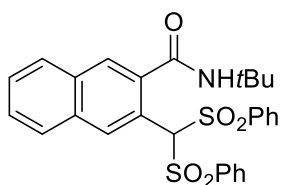

White solid (106.0 mg, 51% yield); **Mp**: 197–199 °C; **<sup>1</sup>H NMR** (400 MHz, CDCl<sub>3</sub>) δ 8.46 (s, 1H), 7.90–7.86 (m, 1H), 7.86–7.79 (m, 6H), 7.64–7.54 (m, 4H), 7.42 (t, *J* = 7.8 Hz, 4H), 7.33 (s, 1H), 5.87 (s, 1H), 1.47 (s, 9H); **<sup>13</sup>C NMR** (101 MHz, CDCl<sub>3</sub>) δ 168.0, 138.4, 135.4, 134.2, 132.8, 132.7, 132.5, 129.5, 128.8, 128.4, 128.0, 127.8, 127.3, 120.1, 81.0, 52.1, 28.6; **HRMS** (ESI): calculated for C<sub>28</sub>H<sub>28</sub>NO<sub>5</sub>S<sub>2</sub> [M+H]<sup>+</sup>: 522.1403, found: 522.1405.



### 3-(Bis(phenylsulfonyl)methyl)-*N*-(*tert*-butyl)thiophene-2-carboxamide (3q)

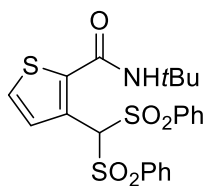

White solid (145.0 mg, 76% yield); **Mp**: 177–179 °C; **<sup>1</sup>H NMR** (400 MHz, CDCl<sub>3</sub>)  $\delta$  7.78 (d,  $J$  = 7.5 Hz, 4H), 7.71 (d,  $J$  = 5.2 Hz, 1H), 7.60 (t,  $J$  = 7.4 Hz, 3H), 7.45 (t,  $J$  = 7.8 Hz, 4H), 7.32 (d,  $J$  = 5.2 Hz, 1H), 5.51 (s, 1H), 1.29 (s, 9H); **<sup>13</sup>C NMR** (101 MHz, CDCl<sub>3</sub>)  $\delta$  160.1, 138.5, 138.2, 134.2, 130.6, 129.1, 128.8, 128.1, 125.7, 79.1, 52.2, 28.6; **HRMS** (ESI): calculated for C<sub>22</sub>H<sub>23</sub>NO<sub>5</sub>S<sub>3</sub>Na [M+Na]<sup>+</sup>: 500.0631, found: 500.0632.

### 2-(Bis(phenylsulfonyl)methyl)-*N*-methylbenzamide (5a)

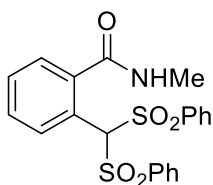

White solid (140.8 mg, 82% yield); **Mp**: 235–237 °C; **<sup>1</sup>H NMR** (400 MHz, CDCl<sub>3</sub>)  $\delta$  8.19 (d,  $J$  = 7.7 Hz, 1H), 7.78 (d,  $J$  = 7.5 Hz, 4H), 7.59 (t,  $J$  = 7.0 Hz, 2H), 7.55–7.39 (m, 6H), 7.36–7.28 (m, 2H), 5.70 (s, 1H), 2.80 (s, 3H); **<sup>13</sup>C NMR** (101 MHz, CDCl<sub>3</sub>)  $\delta$  168.5, 138.7, 137.1, 134.2, 131.9, 130.5, 129.3, 128.8, 127.2, 124.3, 80.6, 26.9; **HRMS** (ESI): calculated for C<sub>21</sub>H<sub>20</sub>NO<sub>5</sub>S<sub>2</sub> [M+H]<sup>+</sup>: 430.0777, found: 430.0781.

### 2-(Bis(phenylsulfonyl)methyl)-*N*-ethylbenzamide (5b)

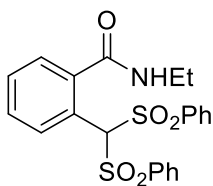

White solid (129.6 mg, 73% yield); **Mp**: 220–222 °C; **<sup>1</sup>H NMR** (400 MHz, CDCl<sub>3</sub>)  $\delta$  8.16 (d,  $J$  = 7.8 Hz, 1H), 7.79 (d,  $J$  = 7.4 Hz, 4H), 7.59 (t,  $J$  = 7.5 Hz, 2H), 7.51 (t,  $J$  = 7.6 Hz, 1H), 7.48–7.40 (m, 5H), 7.33 (d,  $J$  = 7.6 Hz, 1H), 7.30 (s, 1H), 5.75 (s, 1H), 3.37–3.23 (m, 2H), 1.17 (t,  $J$  = 7.3 Hz, 3H); **<sup>13</sup>C NMR** (101 MHz, CDCl<sub>3</sub>)  $\delta$  167.8, 138.6, 137.4, 134.2, 131.9, 130.4, 130.4, 129.3, 128.8, 127.2, 124.2, 80.7, 35.0, 14.5; **HRMS** (ESI): calculated for C<sub>22</sub>H<sub>22</sub>NO<sub>5</sub>S<sub>2</sub> [M+H]<sup>+</sup>: 444.0934, found: 444.0930.

### 2-(Bis(phenylsulfonyl)methyl)-*N*-butylbenzamide (5c)

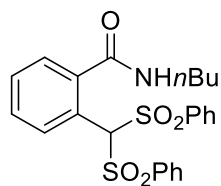

White solid (128.1 mg, 68% yield); **Mp**: 176–178 °C; **<sup>1</sup>H NMR** (400 MHz, CDCl<sub>3</sub>) δ 8.15 (d, *J* = 7.7 Hz, 1H), 7.79 (d, *J* = 7.6 Hz, 4H), 7.59 (t, *J* = 7.4 Hz, 2H), 7.54–7.40 (m, 6H), 7.33 (d, *J* = 7.4 Hz, 1H), 7.29 (s, 1H), 5.77 (s, 1H), 3.34–3.20 (m, 2H), 1.57–1.47 (m, 2H), 1.44–1.32 (m, 2H), 0.95 (t, *J* = 7.3 Hz, 3H); **<sup>13</sup>C NMR** (101 MHz, CDCl<sub>3</sub>) δ 167.9, 138.6, 137.7, 134.2, 131.8, 130.4, 130.3, 129.4, 128.8, 127.2, 124.1, 80.8, 39.9, 31.4, 20.1, 13.7; **HRMS** (ESI): calculated for C<sub>24</sub>H<sub>25</sub>NO<sub>5</sub>S<sub>2</sub>Na [M+Na]<sup>+</sup>: 494.1066, found: 494.1065.

### *N*-Benzyl-2-(bis(phenylsulfonyl)methyl)benzamide (5d)

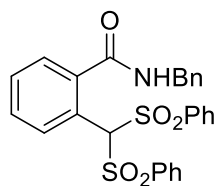

White solid (153.6 mg, 76% yield); **Mp**: 185–187 °C; **<sup>1</sup>H NMR** (400 MHz, CDCl<sub>3</sub>) δ 8.17 (d, *J* = 7.8 Hz, 1H), 7.73 (d, *J* = 7.7 Hz, 4H), 7.58 (t, *J* = 7.4 Hz, 2H), 7.51 (t, *J* = 7.4 Hz, 1H), 7.46–7.29 (m, 11H), 7.22 (s, 1H), 6.18 (s, 1H), 4.47 (d, *J* = 5.6 Hz, 2H); **<sup>13</sup>C NMR** (101 MHz, CDCl<sub>3</sub>) δ 167.7, 138.4, 137.5, 137.3, 134.2, 131.9, 130.5, 130.5, 129.3, 128.9, 128.8, 127.9, 127.8, 127.4, 124.1, 80.8, 44.1; **HRMS** (ESI): calculated for C<sub>27</sub>H<sub>24</sub>NO<sub>5</sub>S<sub>2</sub> [M+H]<sup>+</sup>: 506.1090, found: 506.1094.

### 2-(Bis(phenylsulfonyl)methyl)-*N*-isopropylbenzamide (5e)

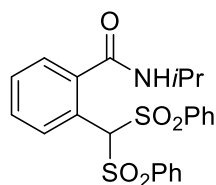

White solid (145.0 mg, 90% yield); **Mp**: 187–189 °C; **<sup>1</sup>H NMR** (400 MHz, CDCl<sub>3</sub>) δ 8.12 (d, *J* = 7.6 Hz, 1H), 7.79 (d, *J* = 7.6 Hz, 4H), 7.59 (t, *J* = 7.4 Hz, 2H), 7.51–7.38 (m, 6H), 7.34 (d, *J* = 9.7 Hz, 2H), 5.76 (d, *J* = 7.2 Hz, 1H), 4.15–4.01 (m, 1H), 1.19 (d, *J* = 6.6 Hz, 6H); **<sup>13</sup>C NMR** (101 MHz, CDCl<sub>3</sub>) δ 167.2, 138.5, 137.8, 134.2, 131.8, 130.4, 130.3, 129.4, 128.8, 127.3, 124.0, 80.9, 42.1, 22.5; **HRMS** (ESI):

calculated for  $C_{23}H_{24}NO_5S_2$   $[M+H]^+$ : 458.1090, found: 458.1090.

**2-(Bis(phenylsulfonyl)methyl)-*N*-cyclohexylbenzamide (5f)**

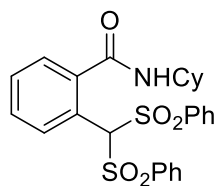

White solid (161.0 mg, 81% yield); **Mp**: 148–150 °C;  **$^1H$  NMR** (400 MHz,  $CDCl_3$ )  $\delta$  8.09 (d,  $J$  = 7.6 Hz, 1H), 7.79 (d,  $J$  = 7.7 Hz, 4H), 7.59 (t,  $J$  = 7.3 Hz, 2H), 7.50–7.38 (m, 6H), 7.34 (d,  $J$  = 7.4 Hz, 1H), 7.30 (s, 1H), 5.80 (d,  $J$  = 7.5 Hz, 1H), 3.79 (d,  $J$  = 7.9 Hz, 1H), 2.05–1.85 (m, 2H), 1.81–1.58 (m, 3H), 1.48–1.30 (m, 2H), 1.26–1.09 (m, 3H);  **$^{13}C$  NMR** (101 MHz,  $CDCl_3$ )  $\delta$  167.1, 138.4, 137.9, 134.3, 131.7, 130.4, 130.2, 129.4, 128.8, 127.4, 124.0, 81.0, 77.3, 77.0, 76.7, 48.9, 32.8, 25.4, 24.7; **HRMS** (ESI): calculated for  $C_{26}H_{28}NO_5S_2$   $[M+H]^+$ : 498.1403, found: 498.1405.

***N*-Adamantyl-2-(bis(phenylsulfonyl)methyl)benzamide (5g)**

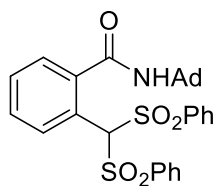

White solid (214.7 mg, 98% yield); **Mp**: 195–197 °C;  **$^1H$  NMR** (400 MHz,  $CDCl_3$ )  $\delta$  7.98 (d,  $J$  = 6.7 Hz, 1H), 7.82 (d,  $J$  = 7.7 Hz, 4H), 7.61 (t,  $J$  = 7.3 Hz, 2H), 7.52–7.37 (m, 6H), 7.36–7.30 (m, 1H), 7.08 (s, 1H), 5.61 (s, 1H), 2.13 (s, 3H), 2.06 (s, 6H), 1.72 (s, 6H);  **$^{13}C$  NMR** (101 MHz,  $CDCl_3$ )  $\delta$  167.2, 139.5, 138.3, 134.3, 131.4, 130.4, 129.8, 129.5, 128.8, 127.4, 123.3, 81.4, 52.8, 41.3, 36.2, 29.4; **HRMS** (ESI): calculated for  $C_{30}H_{31}NO_5S_2Na$   $[M+Na]^+$ : 572.1536, found: 572.1536.

**2-(Bis(phenylsulfonyl)methyl)-*N*-phenylbenzamide (5h)**

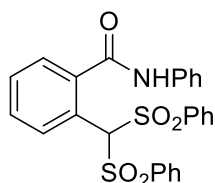

White solid (40.0 mg, 20% yield); **Mp**: 228–230 °C;  **$^1H$  NMR** (500 MHz, Acetone- $d_6$ )  $\delta$  9.21 (s, 1H), 8.16 (d,  $J$  = 7.1 Hz, 1H), 7.75 (d,  $J$  = 6.9 Hz, 4H), 7.71–7.54 (m, 8H), 7.53–7.45 (m, 4H), 7.42–7.32 (m, 2H), 7.22–7.12 (m, 1H);  **$^{13}C$  NMR** (126 MHz, Acetone- $d_6$ )  $\delta$  167.1, 140.2, 139.6, 137.9, 135.2, 132.6, 131.3, 131.0, 129.9, 129.8, 129.4, 129.0, 126.1, 125.1, 121.3, 81.3; **HRMS** (ESI): calculated for

C<sub>26</sub>H<sub>21</sub>NO<sub>5</sub>S<sub>2</sub>Na [M+ Na]<sup>+</sup>: 514.0753, found: 514.0751.

***N*-(*tert*-Butyl)-2-(2-oxo-1-tosylpropyl)benzamide (6a)**

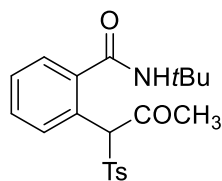

Colorless oil (120.0 mg, 77% yield); <sup>1</sup>H NMR (400 MHz, CDCl<sub>3</sub>) δ 7.60 (d, *J* = 8.2 Hz, 2H), 7.56–7.50 (m, 1H), 7.46–7.38 (m, 3H), 7.31–7.24 (m, 2H), 6.36 (s, 1H), 5.94 (s, 1H), 2.43 (s, 3H), 2.22 (s, 3H), 1.47 (s, 9H); <sup>13</sup>C NMR (101 MHz, CDCl<sub>3</sub>) δ 198.3, 168.6, 145.0, 139.9, 134.9, 130.7, 129.9, 129.7, 129.5, 129.4, 127.4, 125.3, 74.0, 52.1, 31.0, 28.6, 21.6; HRMS (ESI): calculated for C<sub>21</sub>H<sub>26</sub>NO<sub>4</sub>S [M+H]<sup>+</sup>: 388.1577, found: 388.1579.

***N*-(*tert*-Butyl)-2-(1-(methylsulfonyl)-2-oxopropyl)benzamide (6b)**

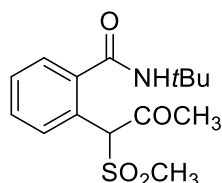

Colorless oil (119.6 mg, 96% yield); <sup>1</sup>H NMR (400 MHz, CDCl<sub>3</sub>) δ 7.60–7.56 (m, 1H), 7.55–7.51 (m, 1H), 7.50–7.45 (m, 2H), 6.24 (s, 1H), 6.16 (s, 1H), 3.01 (s, 3H), 2.32 (s, 3H), 1.49 (s, 9H); <sup>13</sup>C NMR (101 MHz, CDCl<sub>3</sub>) δ 199.3, 168.6, 139.9, 130.2, 129.8, 129.6, 128.0, 125.3, 73.5, 52.3, 39.8, 30.9, 28.6; HRMS (ESI): calculated for C<sub>15</sub>H<sub>22</sub>NO<sub>4</sub>S [M+H]<sup>+</sup>: 312.1264, found: 312.1265.

**Methyl 2-(2-(*tert*-butylcarbamoyl)phenyl)-2-(phenylsulfonyl)acetate (6c)**

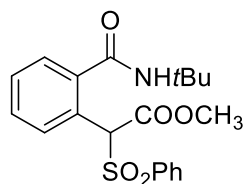

White solid (74.0 mg, 47% yield); **Mp**: 122–124 °C; <sup>1</sup>H NMR (400 MHz, CDCl<sub>3</sub>) δ 7.84–7.72 (m, 3H), 7.66 (t, *J* = 7.3 Hz, 1H), 7.52 (t, *J* = 7.6 Hz, 2H), 7.48–7.37 (m, 3H), 6.32 (s, 1H), 6.07 (s, 1H), 3.63 (s, 3H), 1.50 (s, 9H); <sup>13</sup>C NMR (101 MHz, CDCl<sub>3</sub>) δ 168.3, 165.5, 139.6, 137.2, 134.2, 130.9, 129.7, 129.7, 129.6, 128.8, 127.5, 124.9, 68.8, 53.1, 52.2, 28.6; HRMS (ESI): calculated for C<sub>20</sub>H<sub>24</sub>NO<sub>5</sub>S [M+H]<sup>+</sup>: 390.1370, found: 390.1372.

**Methyl 2-(2-(*tert*-butylcarbamoyl)phenyl)-2-(methylsulfonyl)acetate (6d)**

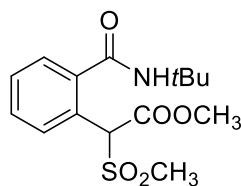

White solid (64.5 mg, 49% yield); **Mp**: 138–140 °C; **<sup>1</sup>H NMR** (400 MHz, CDCl<sub>3</sub>) δ 7.85 (d, *J* = 7.2 Hz, 1H), 7.60–7.40 (m, 3H), 6.23–6.05 (m, 2H), 3.82 (s, 3H), 3.07 (s, 3H), 1.47 (s, 9H); **<sup>13</sup>C NMR** (101 MHz, CDCl<sub>3</sub>) δ 168.3, 165.9, 139.4, 130.1, 129.9, 129.8, 127.8, 125.5, 68.0, 53.5, 52.3, 39.5, 28.6; **HRMS** (ESI): calculated for C<sub>15</sub>H<sub>22</sub>NO<sub>5</sub>S [M+H]<sup>+</sup>: 328.1213, found: 328.1215.

***N*-(*tert*-Butyl)-2-methylbenzamide (7)**

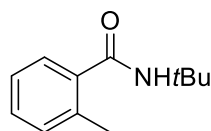

White solid (20.6 mg, 86% yield); **Mp**: 80–82 °C; **<sup>1</sup>H NMR** (400 MHz, CDCl<sub>3</sub>) δ 7.35–7.24 (m, 2H), 7.22–7.13 (m, 2H), 5.57 (s, 1H), 2.43 (s, 3H), 1.46 (s, 9H); **<sup>13</sup>C NMR** (101 MHz, CDCl<sub>3</sub>) δ 169.7, 137.9, 135.4, 130.8, 129.4, 126.4, 125.6, 51.7, 28.8, 19.5; **HRMS** (ESI): calculated for C<sub>24</sub>H<sub>20</sub>NO<sub>5</sub>S<sub>2</sub>Na [M+Na]<sup>+</sup>: 214.1202, found: 214.1205.

***N*-(*tert*-Butyl)-2-(methyl-*d*<sub>3</sub>)benzamide (8)**

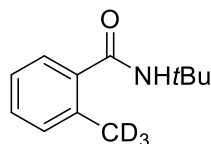

White solid (28.9 mg, 74% yield); **Mp**: 78–80 °C; **<sup>1</sup>H NMR** (400 MHz, CDCl<sub>3</sub>) δ 7.36–7.24 (m, 2H), 7.23–7.13 (m, 2H), 5.58 (s, 1H), 1.46 (s, 9H); **<sup>13</sup>C NMR** (101 MHz, CDCl<sub>3</sub>) δ 169.7, 137.9, 135.3, 130.8, 129.4, 126.4, 125.6, 51.7, 28.8, 18.7 (septet, *J* = 19.2 Hz); **HRMS** (ESI): calculated for C<sub>24</sub>H<sub>21</sub>N<sub>2</sub>O<sub>4</sub>S<sub>2</sub>Na [M+Na]<sup>+</sup>: 217.1391, found: 217.1394.

***N*-(*tert*-Butyl)-2-((phenylsulfonyl)methyl)benzamide (9)**

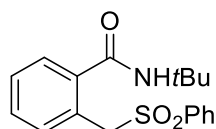

White solid (54.4 mg, 82% yield); **Mp**: 146–148 °C; **<sup>1</sup>H NMR** (500 MHz, CDCl<sub>3</sub>) δ 7.82 (d, *J* = 7.8 Hz,

2H), 7.67 (t,  $J = 7.4$  Hz, 1H), 7.55 (t,  $J = 7.7$  Hz, 2H), 7.48 (d,  $J = 7.5$  Hz, 1H), 7.37 (t,  $J = 7.4$  Hz, 1H), 7.32 (t,  $J = 7.5$  Hz, 1H), 7.11 (d,  $J = 7.6$  Hz, 1H), 6.35 (s, 1H), 4.68 (s, 2H), 1.50 (s, 9H);  $^{13}\text{C}$  NMR (126 MHz,  $\text{CDCl}_3$ )  $\delta$  168.6, 139.9, 138.8, 133.9, 132.5, 129.5, 129.2, 129.0, 128.3, 128.0, 124.6, 59.0, 52.0, 28.7; **HRMS** (ESI): calculated for  $\text{C}_{18}\text{H}_{22}\text{NO}_3\text{S}$   $[\text{M}+\text{H}]^+$ : 332.1315, found: 332.1316.

***N*-(*tert*-Butyl)-2-(1-(phenylsulfonyl)ethyl)benzamide (10)**

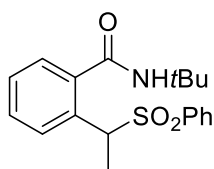

White solid (51.2 mg, 74% yield); **Mp**: 178–180 °C;  $^1\text{H}$  NMR (400 MHz,  $\text{CDCl}_3$ )  $\delta$  7.75 (d,  $J = 7.2$  Hz, 2H), 7.64 (t,  $J = 7.4$  Hz, 1H), 7.56–7.47 (m, 3H), 7.44–7.33 (m, 3H), 6.05 (s, 1H), 5.15 (q,  $J = 7.0$  Hz, 1H), 1.63 (d,  $J = 7.0$  Hz, 3H), 1.48 (s, 9H);  $^{13}\text{C}$  NMR (101 MHz,  $\text{CDCl}_3$ )  $\delta$  169.0, 139.9, 137.4, 133.6, 130.7, 129.7, 129.1, 129.0, 129.0, 128.7, 127.4, 60.4, 52.0, 28.7, 15.6; **HRMS** (ESI): calculated for  $\text{C}_{19}\text{H}_{24}\text{NO}_3\text{S}$   $[\text{M}+\text{H}]^+$ : 346.1471, found: 346.1472.

***N*-(*tert*-Butyl)-2-ethylbenzamide (11)**

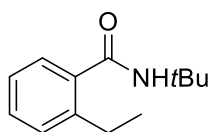

White solid (18.0 mg, 88% yield); **Mp**: 78–80 °C;  $^1\text{H}$  NMR (400 MHz,  $\text{CDCl}_3$ )  $\delta$  7.34–7.27 (m, 2H), 7.23 (d,  $J = 7.1$  Hz, 1H), 7.20–7.14 (m, 1H), 5.57 (s, 1H), 2.79 (q,  $J = 7.6$  Hz, 2H), 1.46 (s, 9H), 1.24 (t,  $J = 7.6$  Hz, 3H);  $^{13}\text{C}$  NMR (101 MHz,  $\text{CDCl}_3$ )  $\delta$  169.8, 141.8, 137.6, 129.5, 129.3, 126.5, 125.6, 51.7, 28.8, 26.2, 15.8; **HRMS** (ESI): calculated for  $\text{C}_{13}\text{H}_{20}\text{NO}$   $[\text{M}+\text{H}]^+$ : 206.1539, found: 206.1541.

**Methyl 2-(2-(*tert*-butylcarbamoyl)phenyl)acetate (12)**

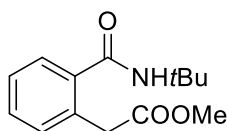

Colorless oil (16.0 mg, 64% yield);  $^1\text{H}$  NMR (400 MHz,  $\text{CDCl}_3$ )  $\delta$  7.46 (dd,  $J = 7.4, 1.1$  Hz, 1H), 7.38–7.28 (m, 2H), 7.22 (d,  $J = 7.5$  Hz, 1H), 6.22 (s, 1H), 3.87 (s, 2H), 3.71 (s, 3H), 1.44 (s, 9H);  $^{13}\text{C}$  NMR (101 MHz,  $\text{CDCl}_3$ )  $\delta$  172.6, 167.0, 138.3, 131.4, 130.9, 129.8, 127.6, 127.5, 52.1, 51.8, 38.7, 28.7; **HRMS** (ESI): calculated for  $\text{C}_{14}\text{H}_{20}\text{NO}_3$   $[\text{M}+\text{H}]^+$ : 250.1438, found: 250.1439.

## 7. References

- [1] M. Chong, Y. X. Hu, W. J. Lu, *Synthesis* **2018**, *50*, 2999–3005.
- [2] M. N. Esfahani, M. Montazerozohori, Z. Karami, *Org. Prep. Proced. Int.* **2016**, *48*, 321–327.
- [3] R. F. Sun, Z. W. Wang, Y. Q. Li, L. X. Xiong, Y. X. Liu, Q. M. Wang, *J. Agric. Food Chem.* **2013**, *61*, 517–522.
- [4] G. Heyes, G. Holt, *J. Chem. Soc. Perkin I.* **1973**, 189–193.
- [5] Y. Dong, J. J. Chen, H. Xu, *Chem. Commun.* **2019**, *55*, 2027–2030.

## 8. NMR spectra of products

### $^1\text{H}$ NMR (400 MHz) Spectrum of 3a in $\text{CDCl}_3$

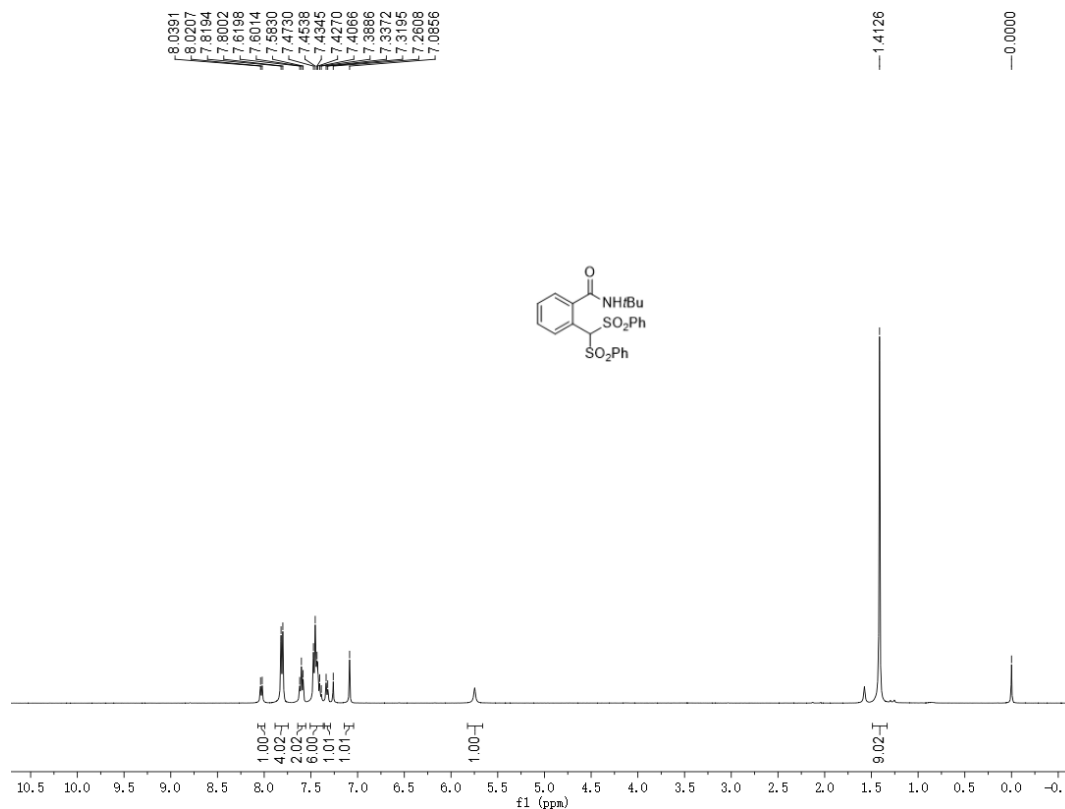

### $^{13}\text{C}\{^1\text{H}\}$ NMR (101 MHz) Spectrum of 3a in $\text{CDCl}_3$

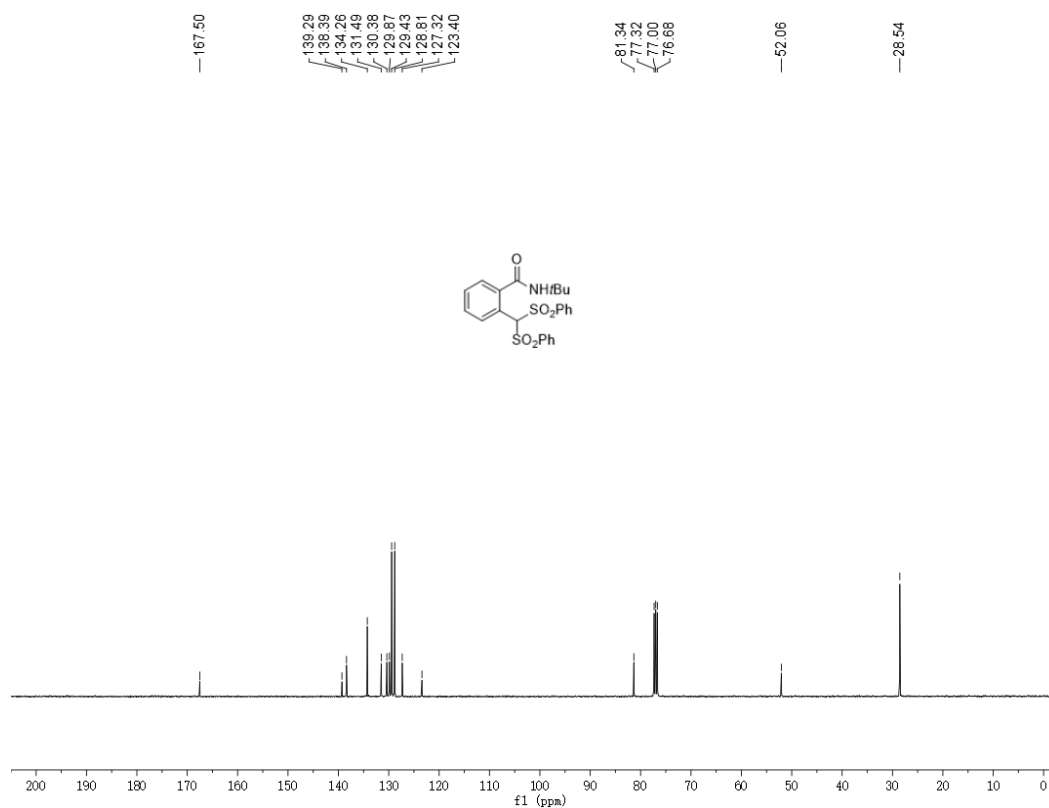



**<sup>1</sup>H NMR (400 MHz) Spectrum of 3c in CDCl<sub>3</sub>**

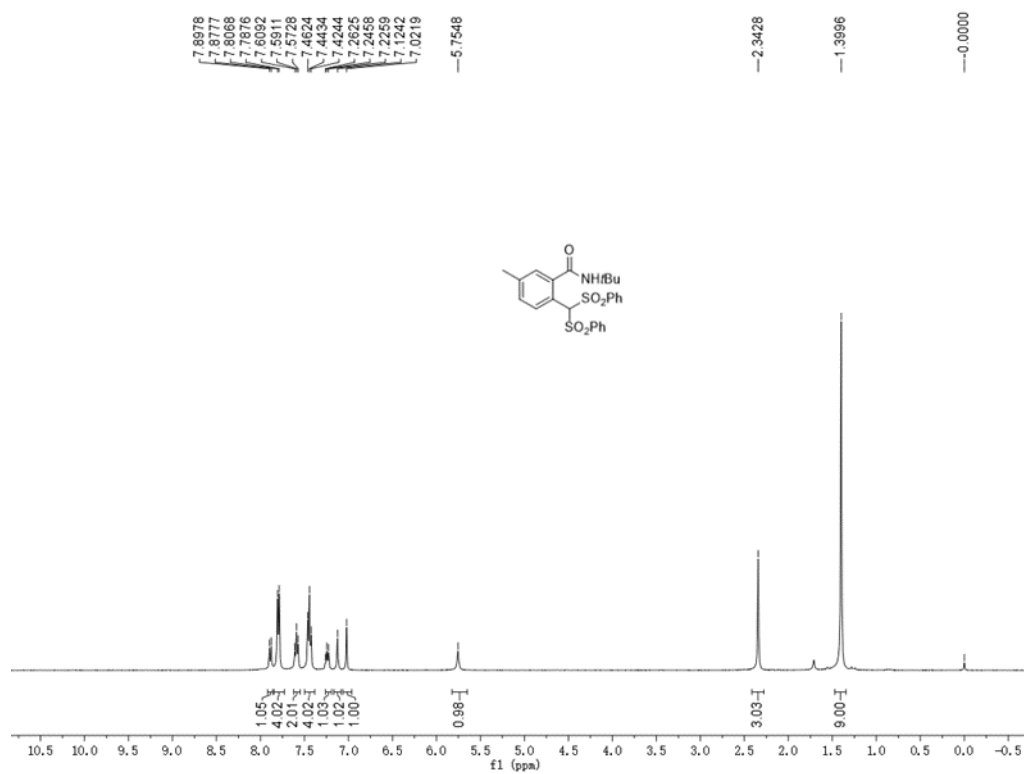

**<sup>13</sup>C{<sup>1</sup>H} NMR (101 MHz) Spectrum of 3c in CDCl<sub>3</sub>**

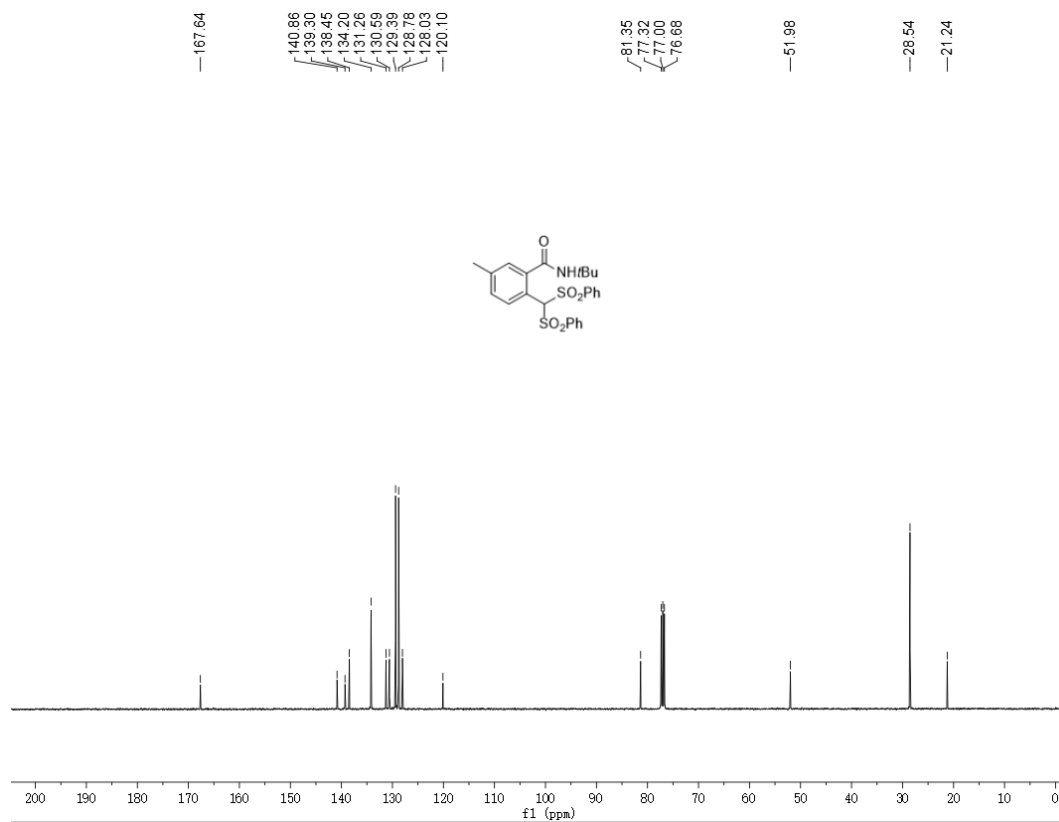

**<sup>1</sup>H NMR (400 MHz) Spectrum of 3d in CDCl<sub>3</sub>**

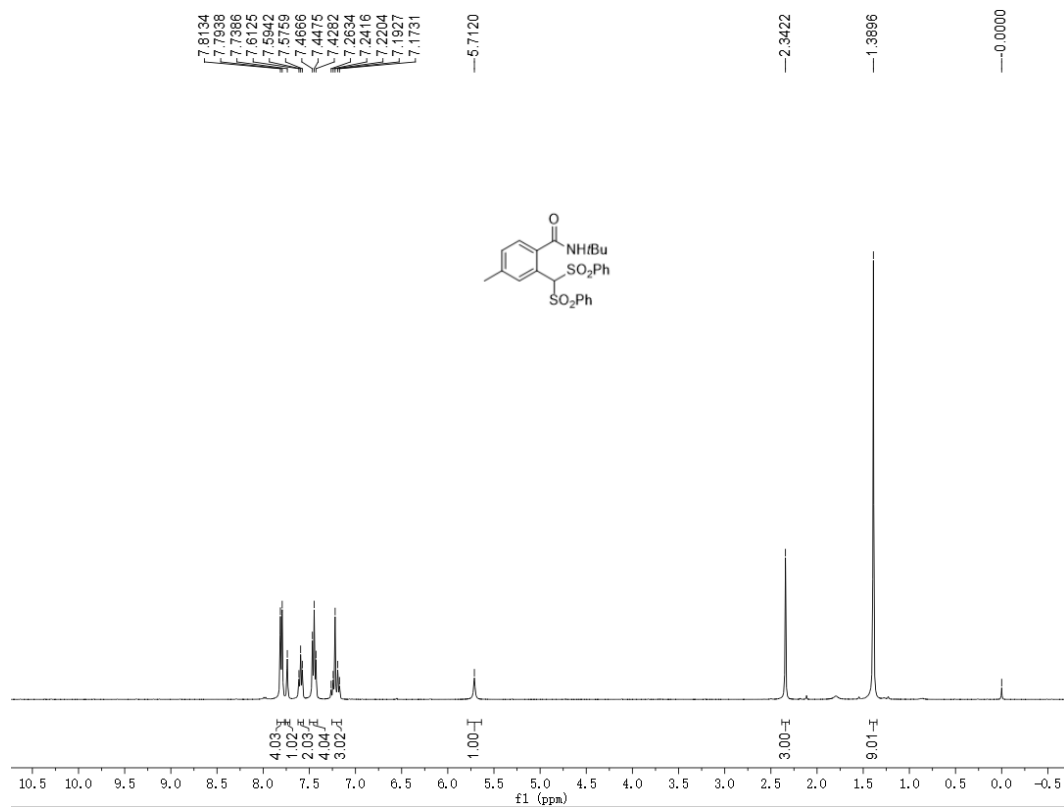

**<sup>13</sup>C{<sup>1</sup>H} NMR (101 MHz) Spectrum of 3d in CDCl<sub>3</sub>**

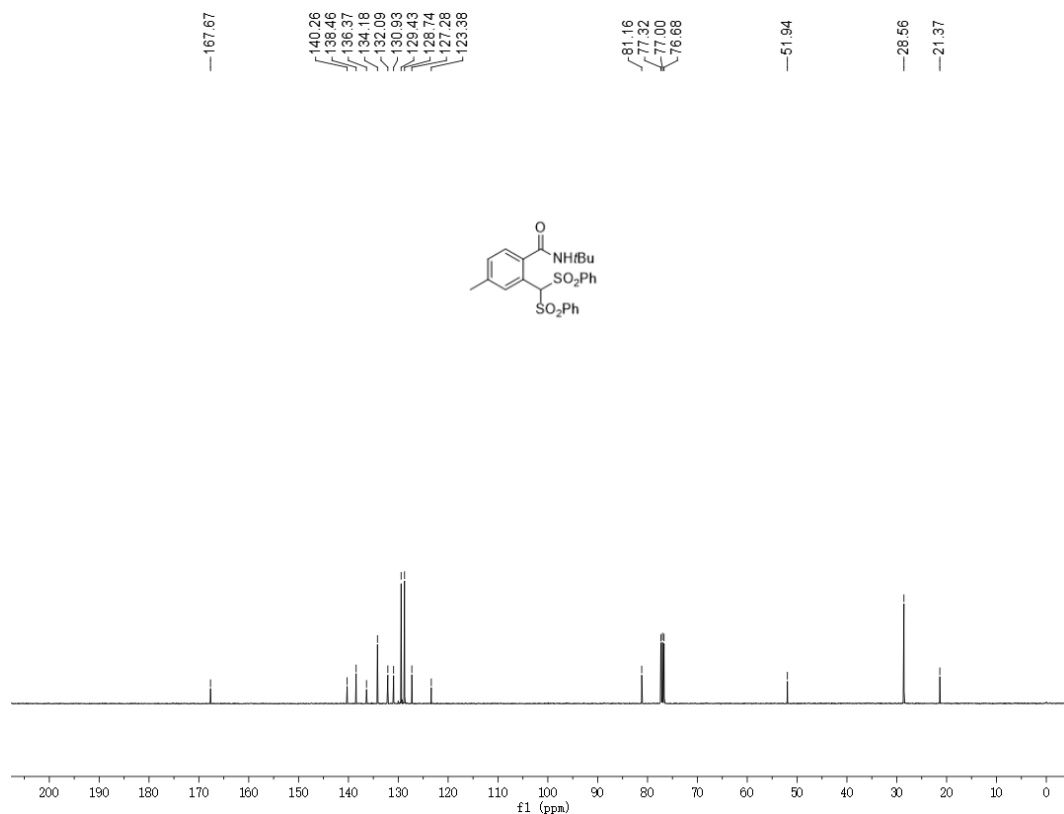

**<sup>1</sup>H NMR (400 MHz) Spectrum of 3e in CDCl<sub>3</sub>**

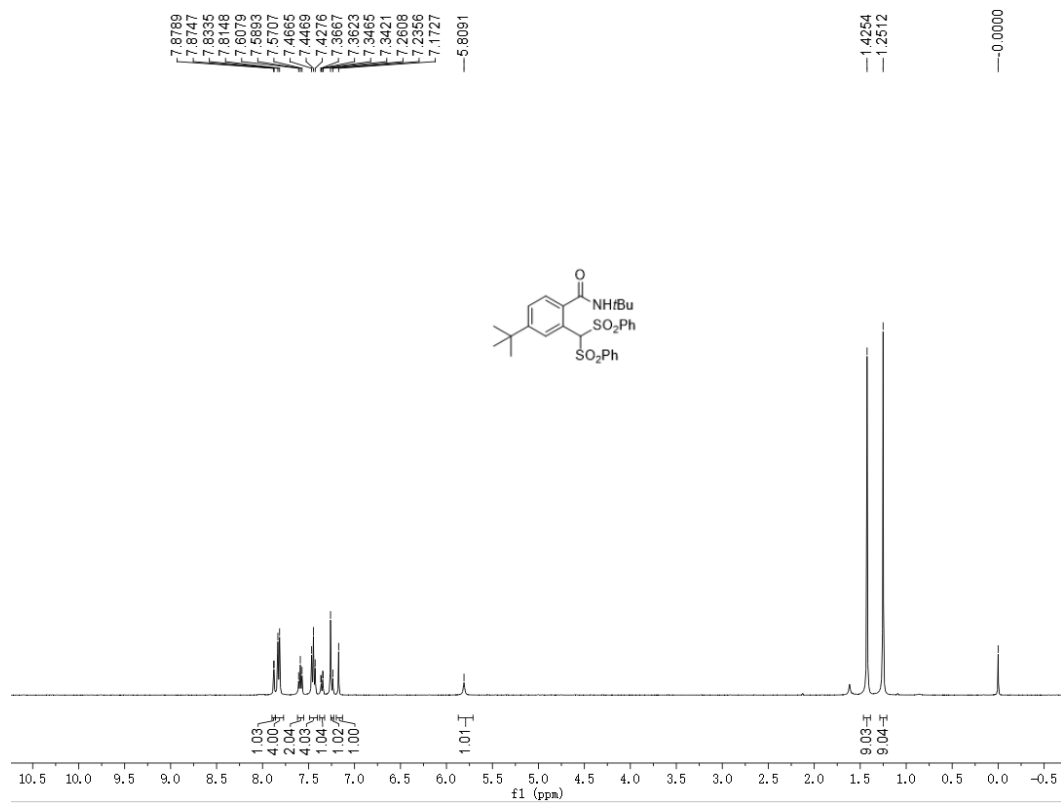

**<sup>13</sup>C{<sup>1</sup>H} NMR (101 MHz) Spectrum of 3e in CDCl<sub>3</sub>**

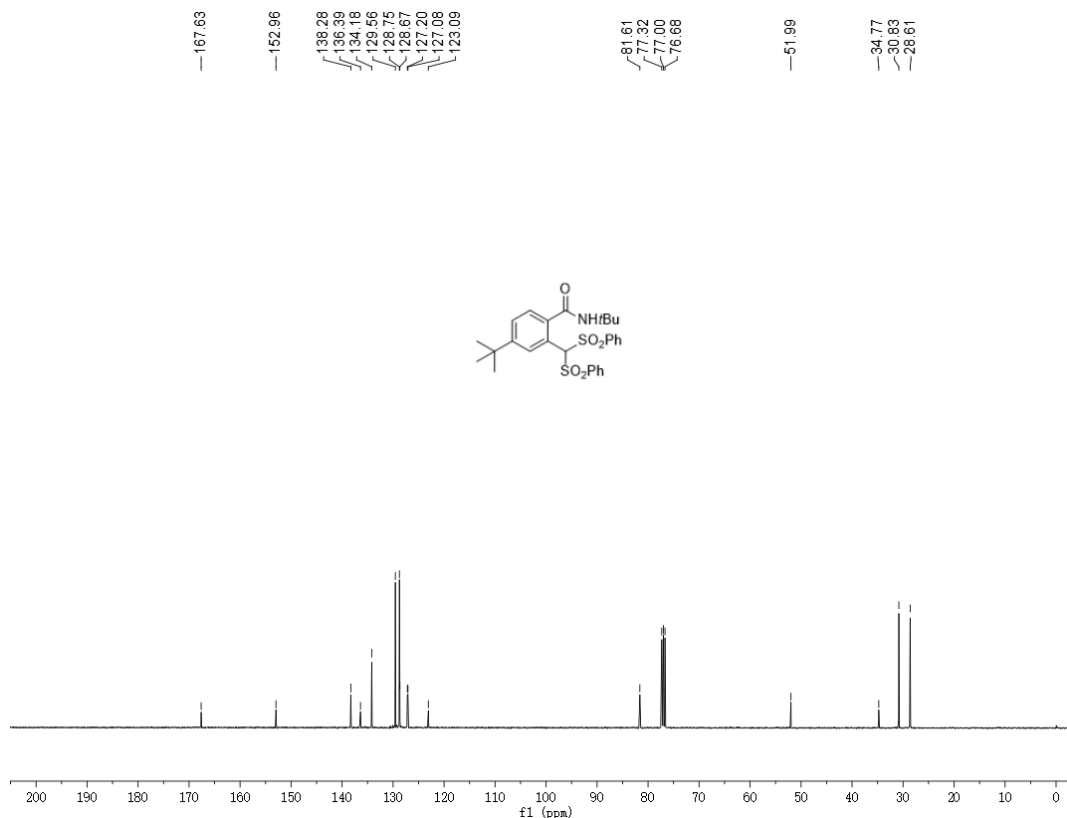

**<sup>1</sup>H NMR (400 MHz) Spectrum of 3f in acetone-d<sub>6</sub>**

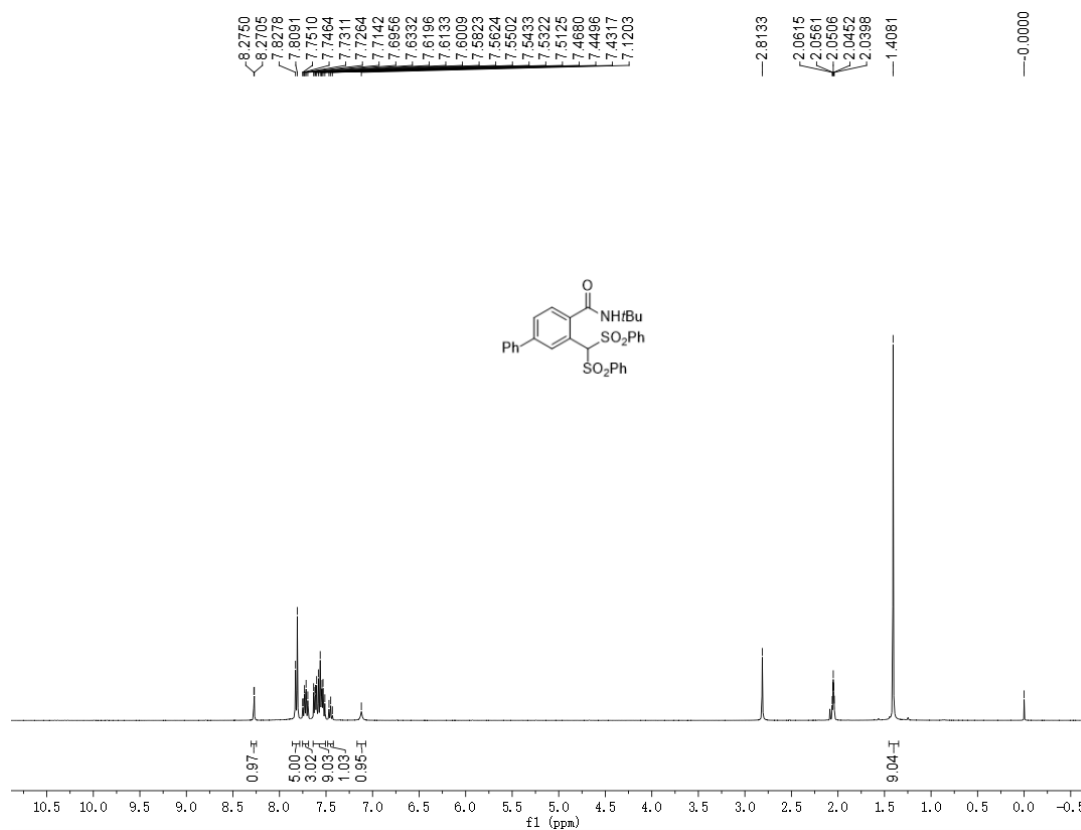

**<sup>13</sup>C{<sup>1</sup>H} NMR (101 MHz) Spectrum of 3f in acetone-d<sub>6</sub>**

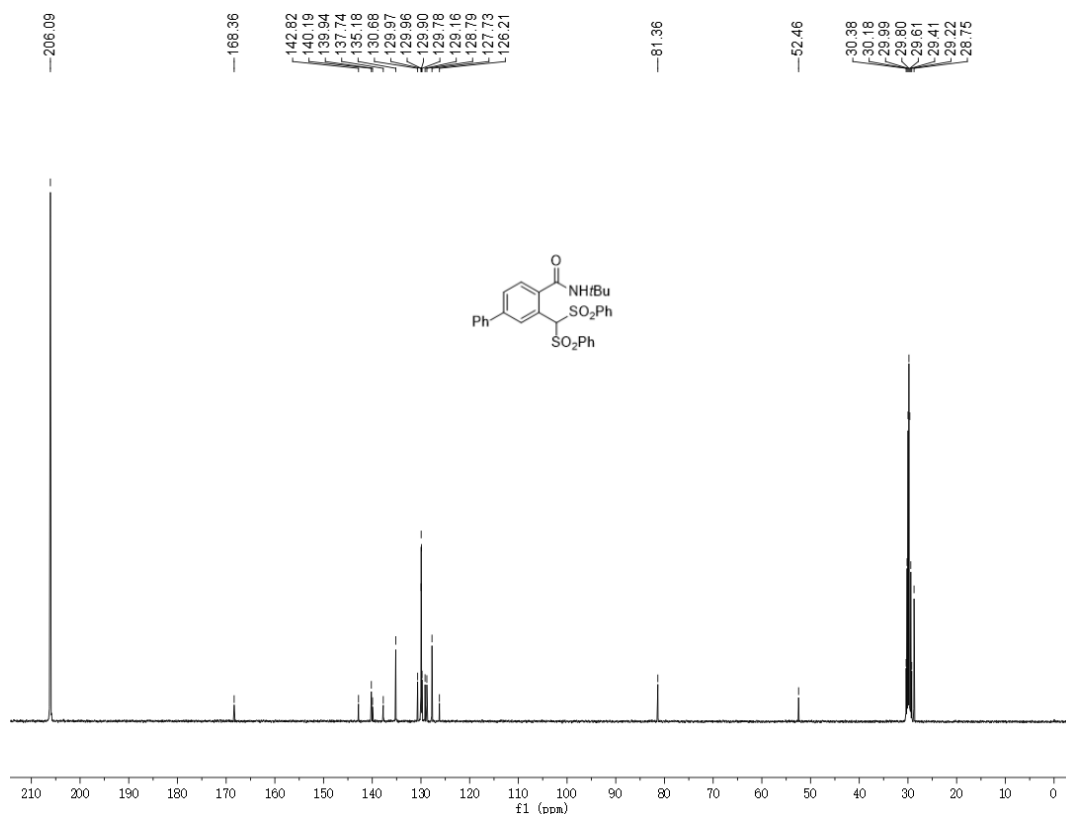

**<sup>1</sup>H NMR (400 MHz) Spectrum of 3g in CDCl<sub>3</sub>**

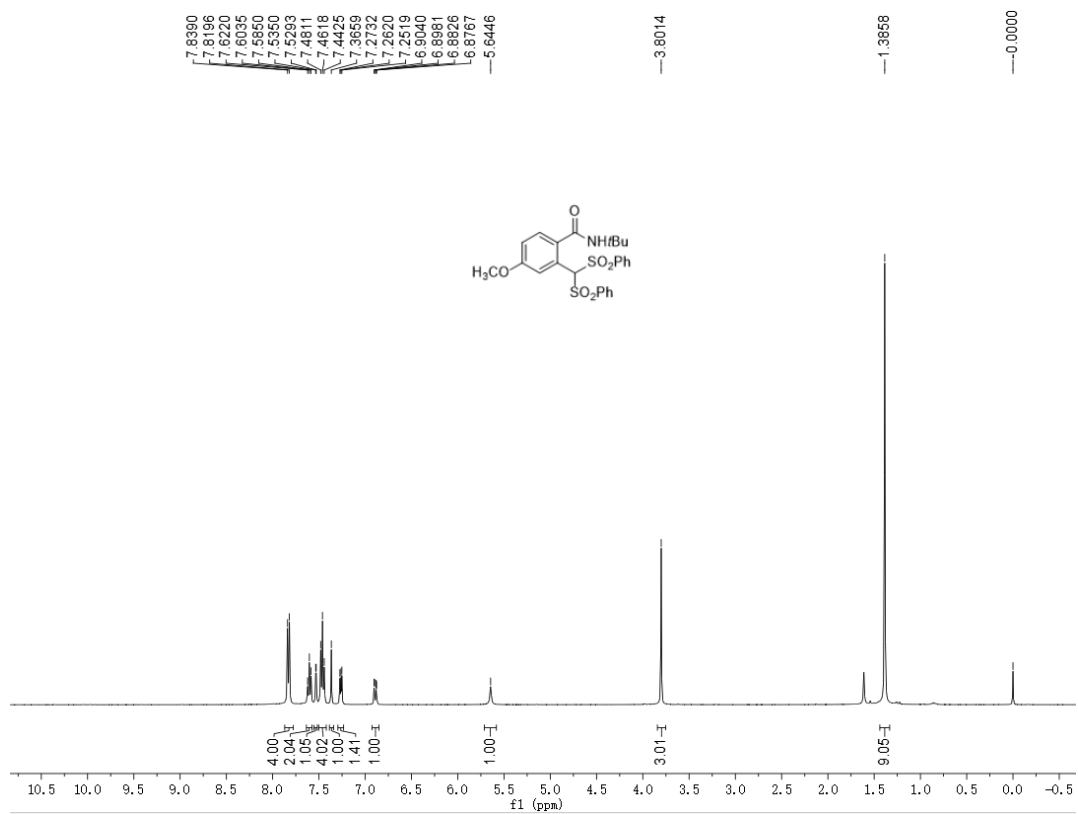

**<sup>13</sup>C{<sup>1</sup>H} NMR (101 MHz) Spectrum of 3g in CDCl<sub>3</sub>**

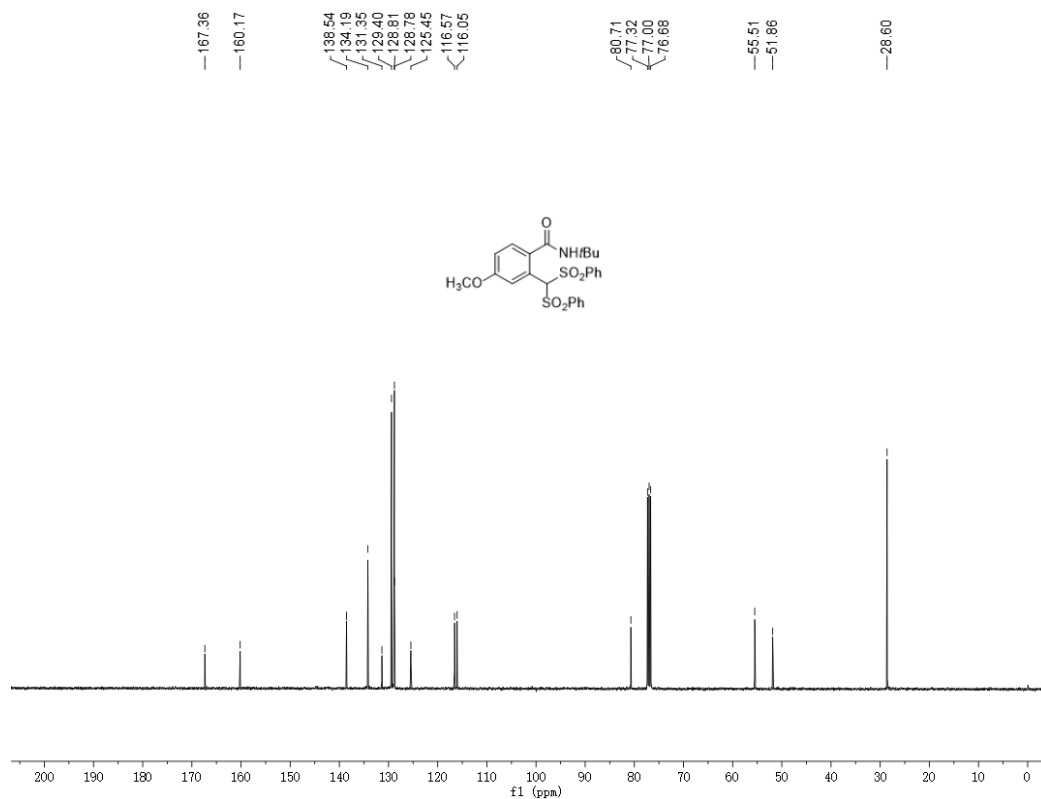

**<sup>1</sup>H NMR (400 MHz) Spectrum of 3h in acetone-*d*<sub>6</sub>**

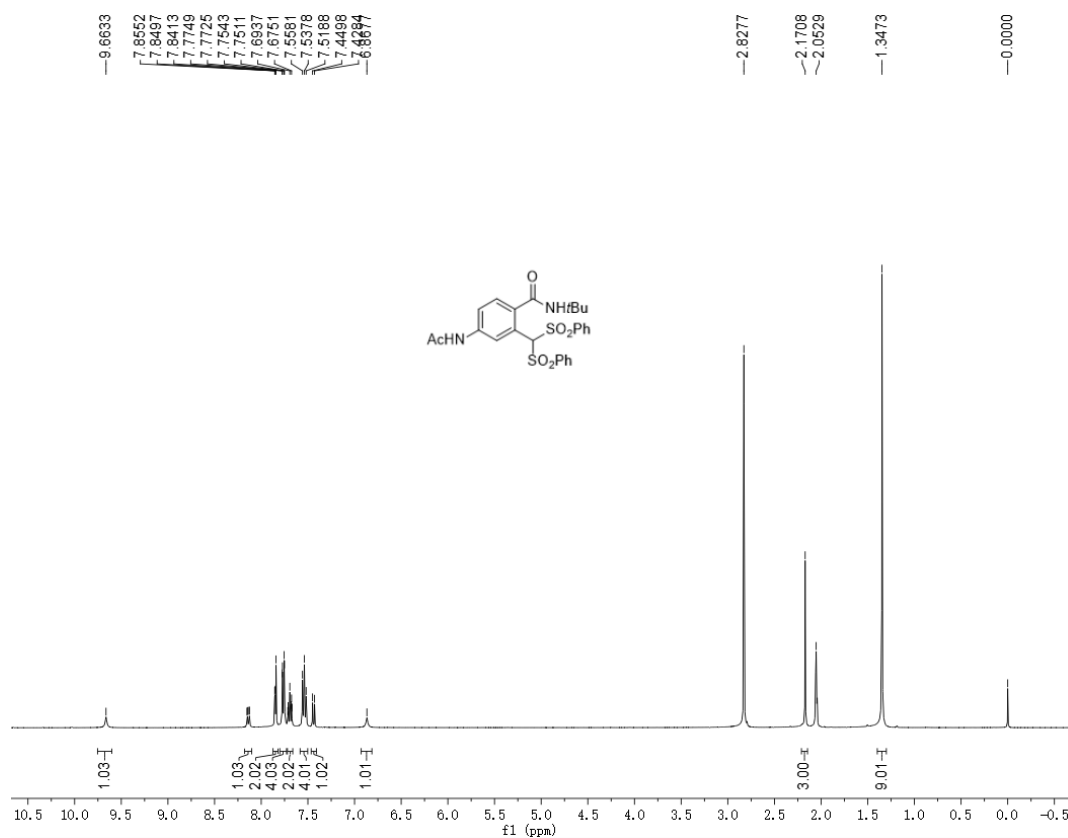

**<sup>13</sup>C{<sup>1</sup>H} NMR (101 MHz) Spectrum of 3h in acetone-*d*<sub>6</sub>**

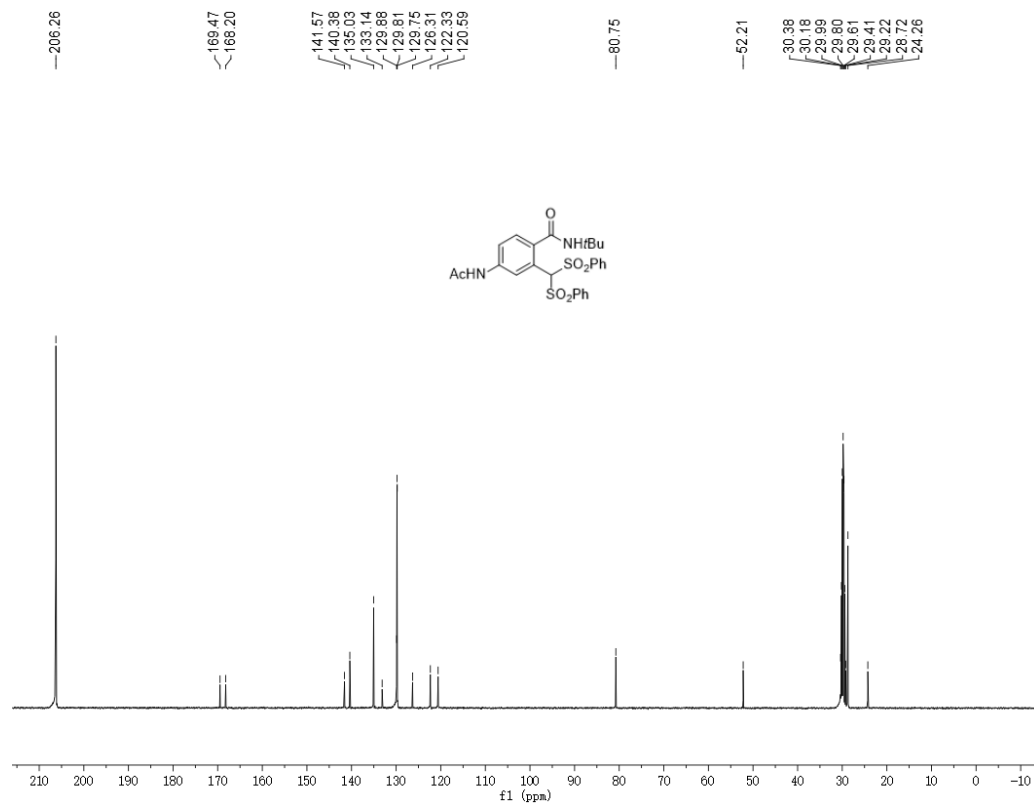

**<sup>1</sup>H NMR (400 MHz) Spectrum of 3i in acetone-*d*<sub>6</sub>**

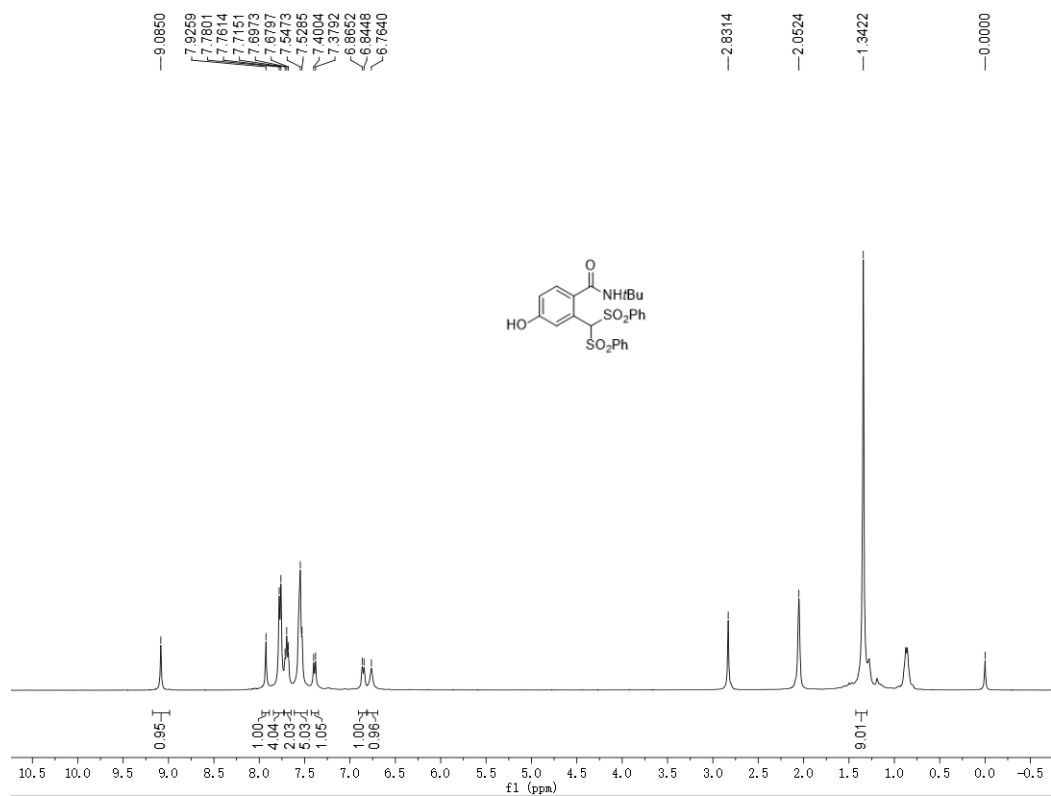

**<sup>13</sup>C{<sup>1</sup>H} NMR (101 MHz) Spectrum of 3i in acetone-*d*<sub>6</sub>**

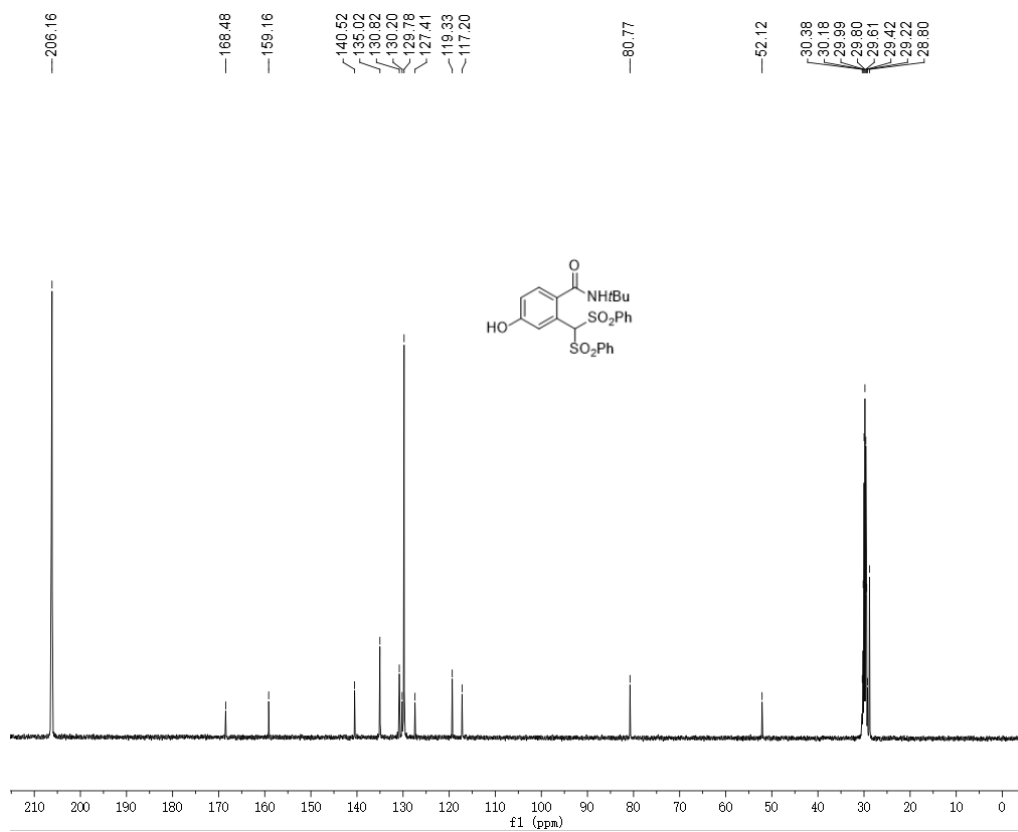

**<sup>1</sup>H NMR (500 MHz) Spectrum of 3j in acetone-*d*<sub>6</sub>**

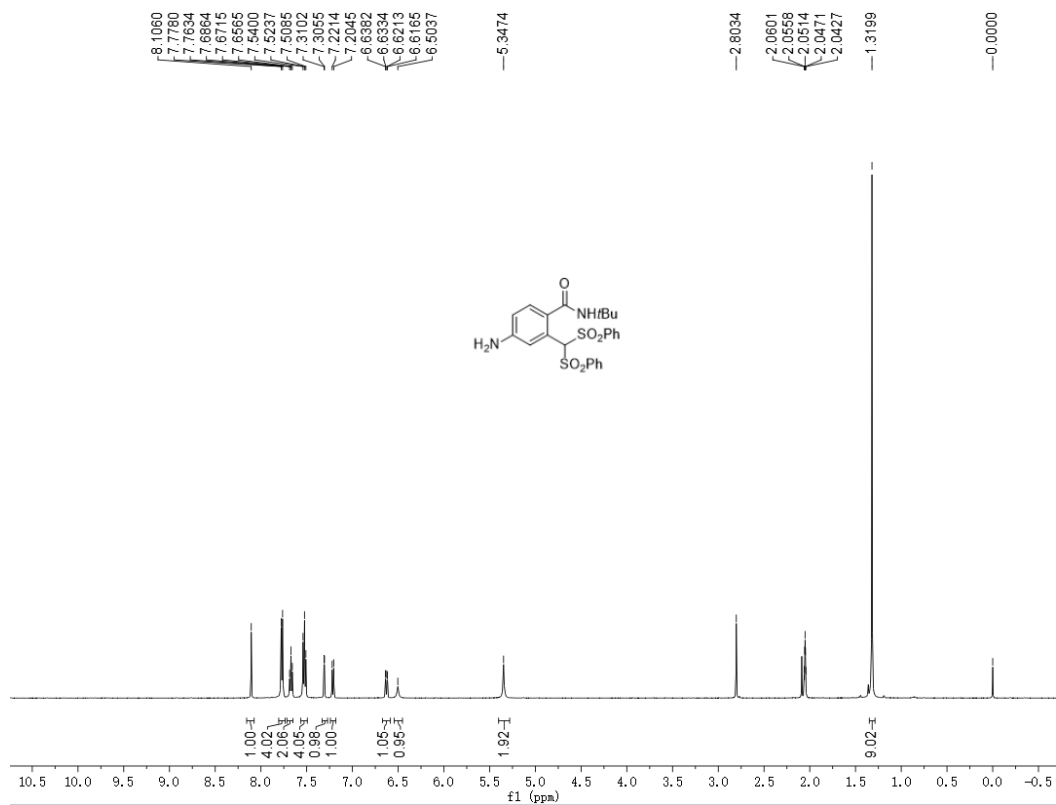

**<sup>13</sup>C{<sup>1</sup>H} NMR (126 MHz) Spectrum of 3j in acetone-*d*<sub>6</sub>**

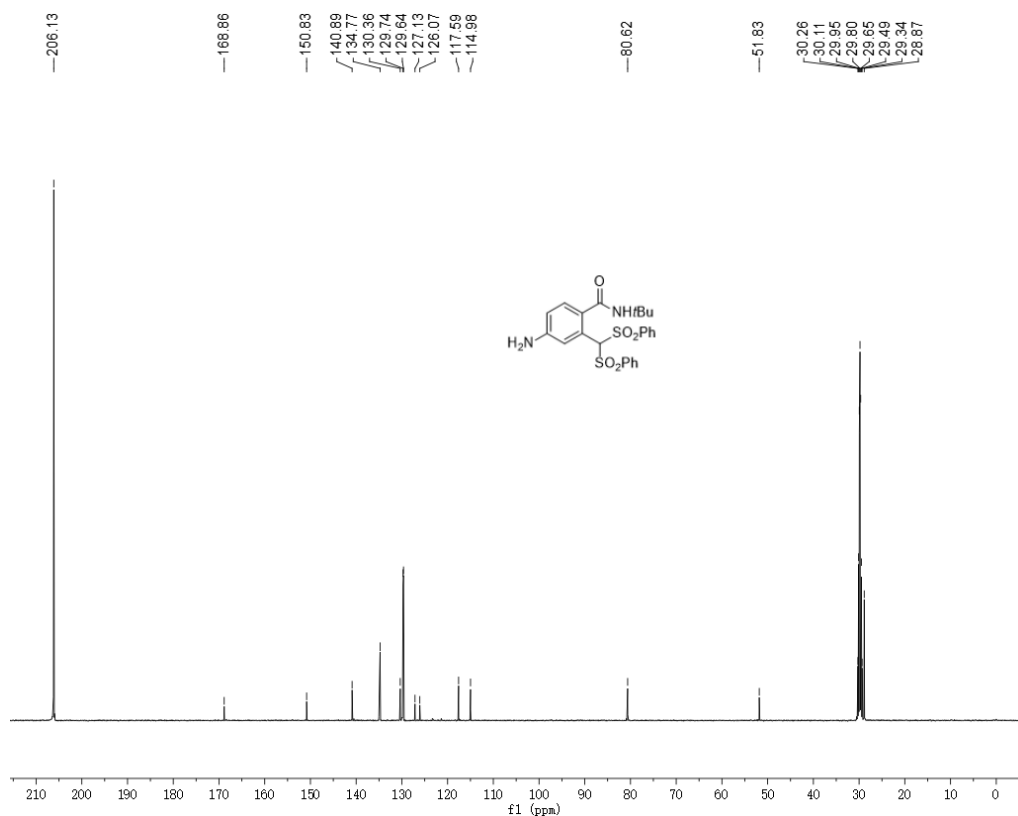



### $^1\text{H}$ NMR (400 MHz) Spectrum of 3k in $\text{CDCl}_3$

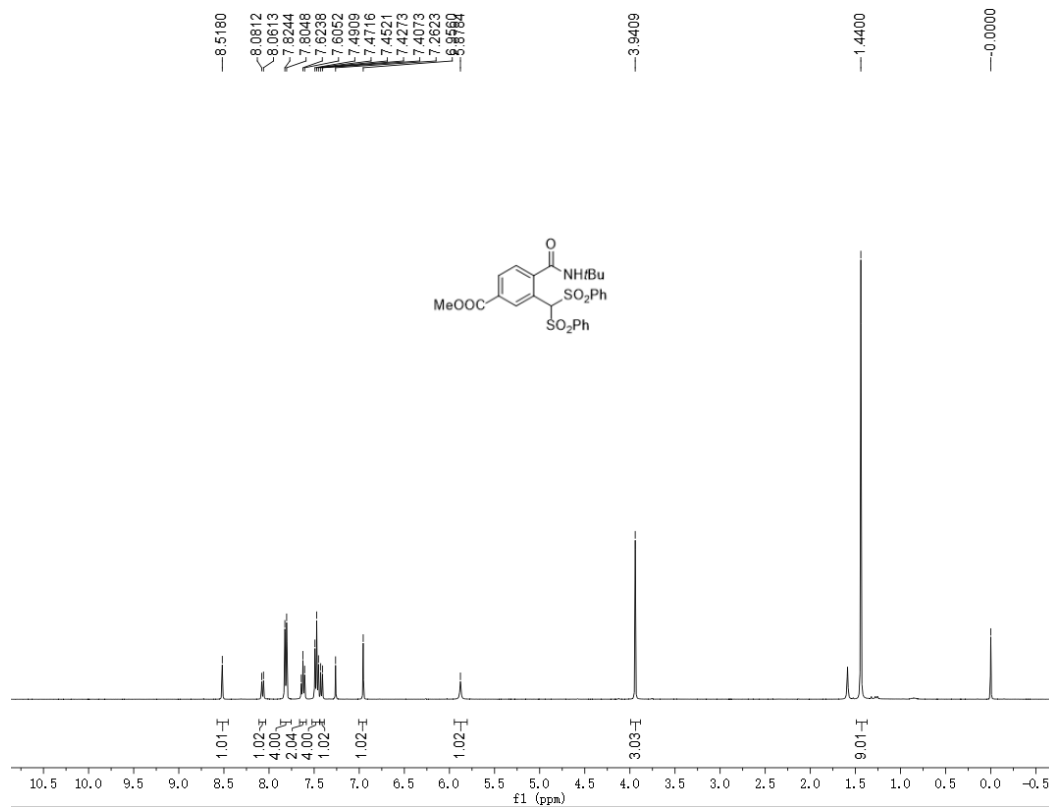

### $^{13}\text{C}\{^1\text{H}\}$ NMR (101 MHz) Spectrum of 3k in $\text{CDCl}_3$

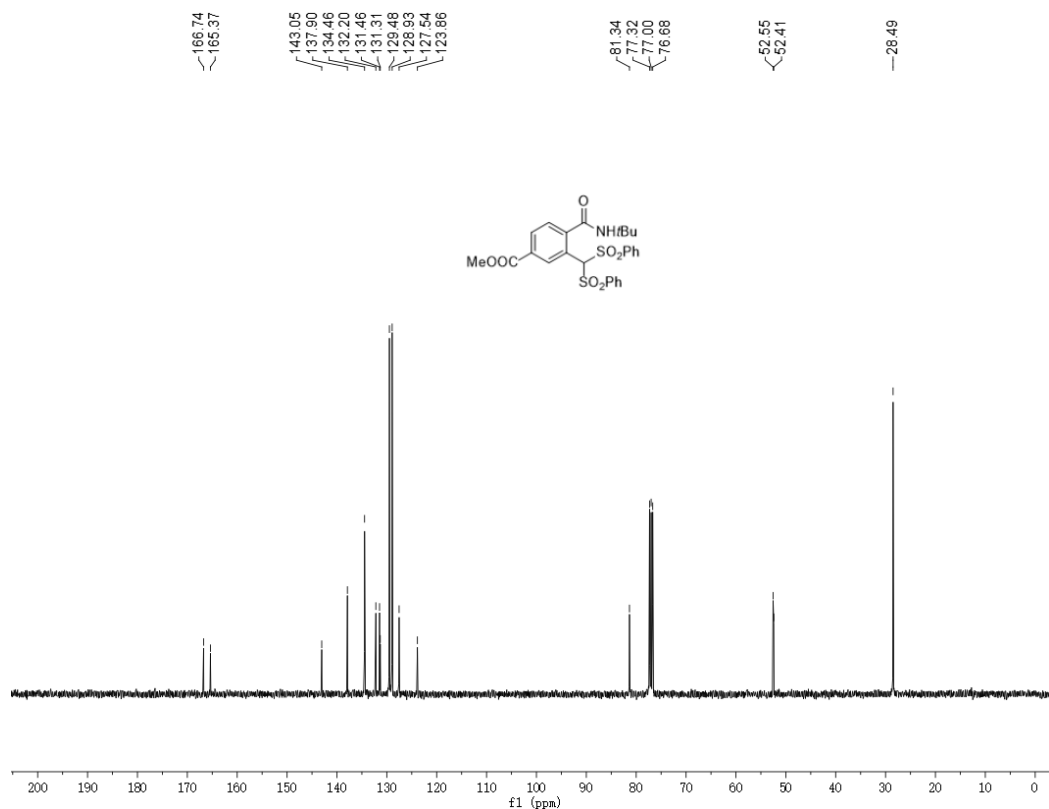

**<sup>1</sup>H NMR (400 MHz) Spectrum of 3l in CDCl<sub>3</sub>**

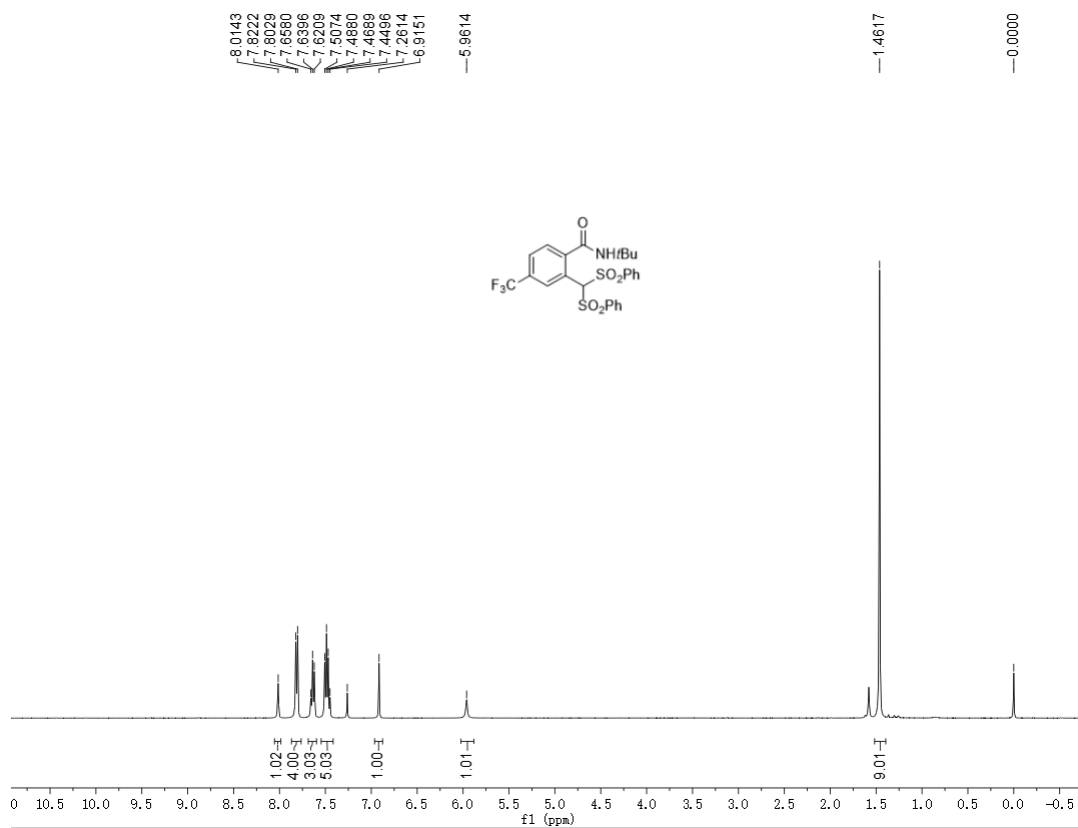

**<sup>13</sup>C{<sup>1</sup>H} NMR (101 MHz) Spectrum of 3l in CDCl<sub>3</sub>**

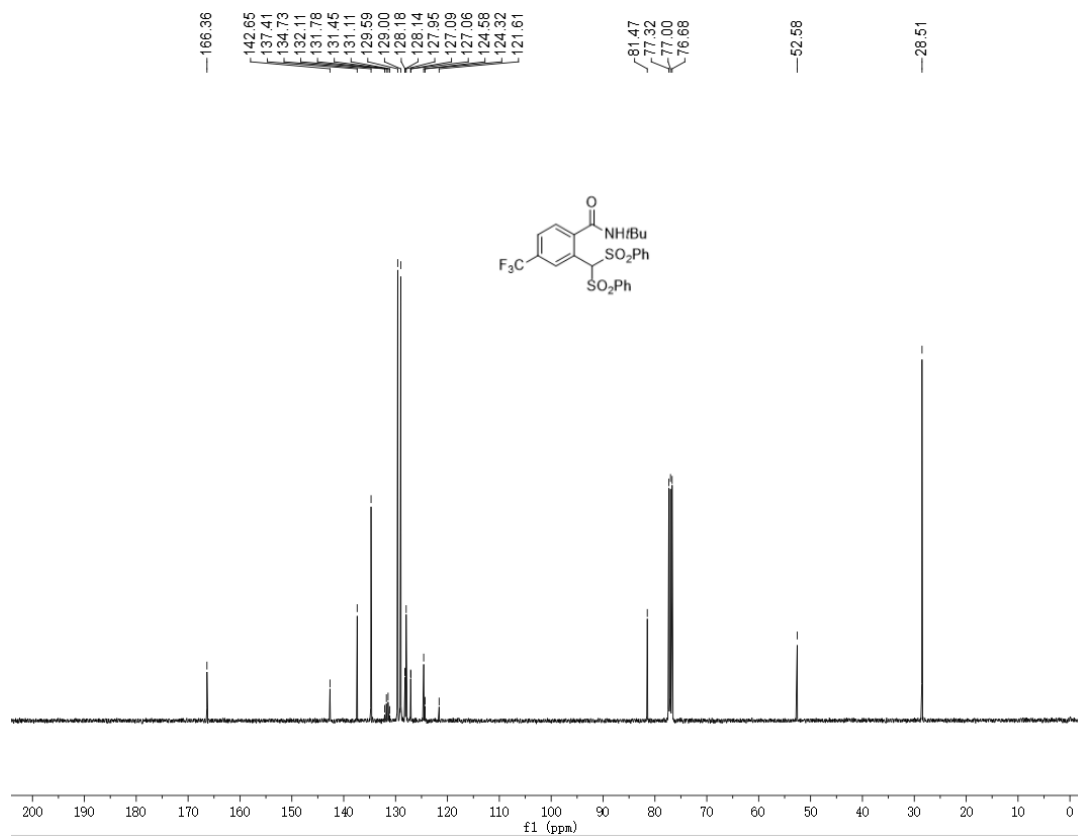

**$^{19}\text{F}$  NMR (376 MHz) Spectrum of 3l in  $\text{CDCl}_3$**

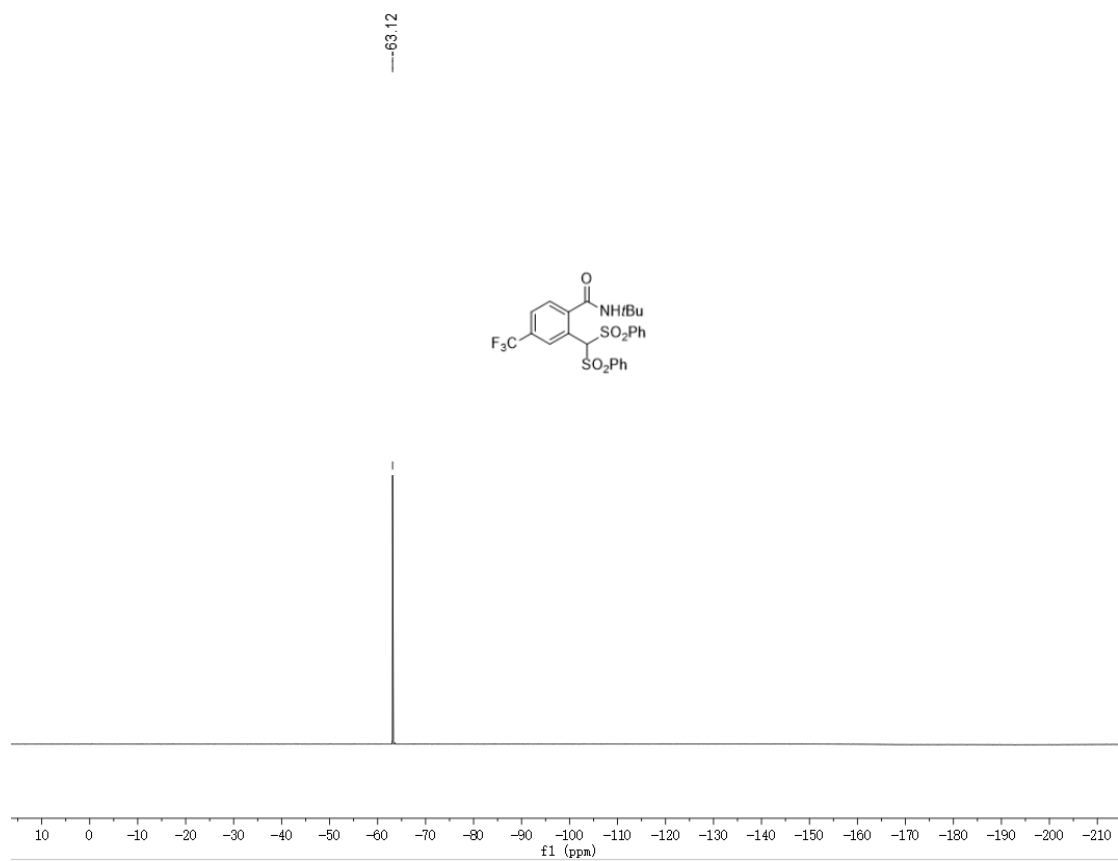

**<sup>1</sup>H NMR (400 MHz) Spectrum of 3m in CDCl<sub>3</sub>**

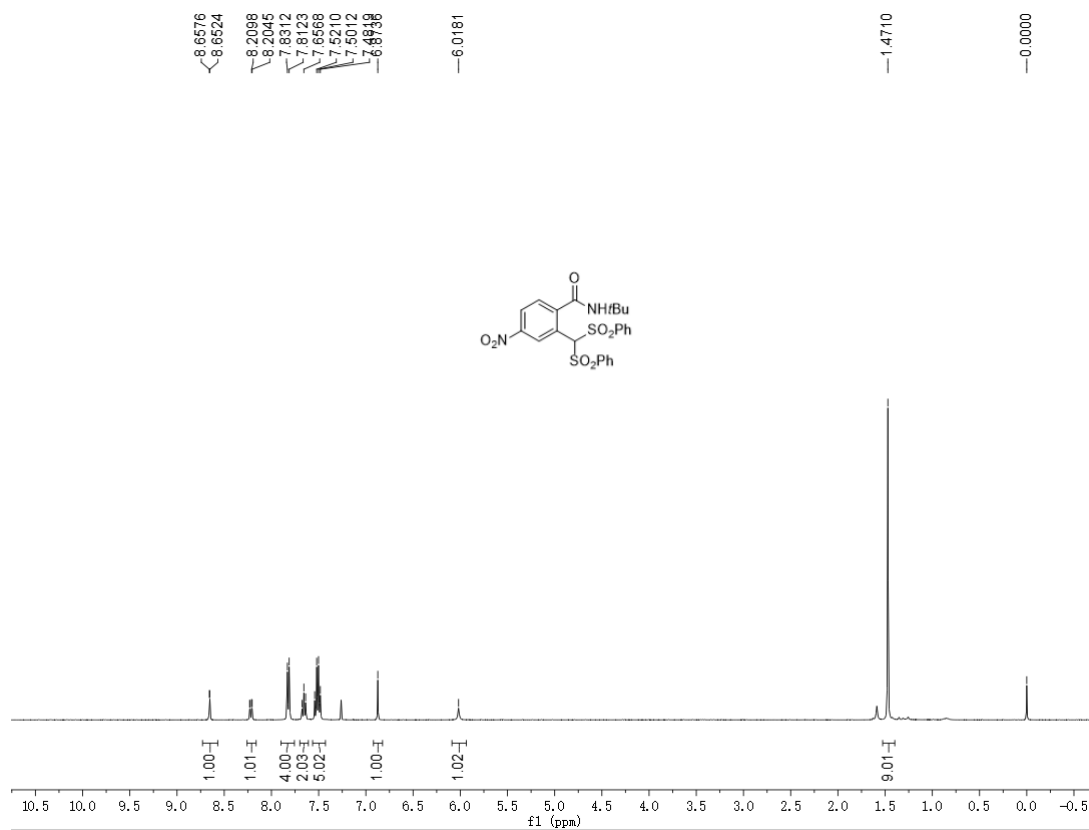

**<sup>13</sup>C{<sup>1</sup>H} NMR (101 MHz) Spectrum of 3m in CDCl<sub>3</sub>**

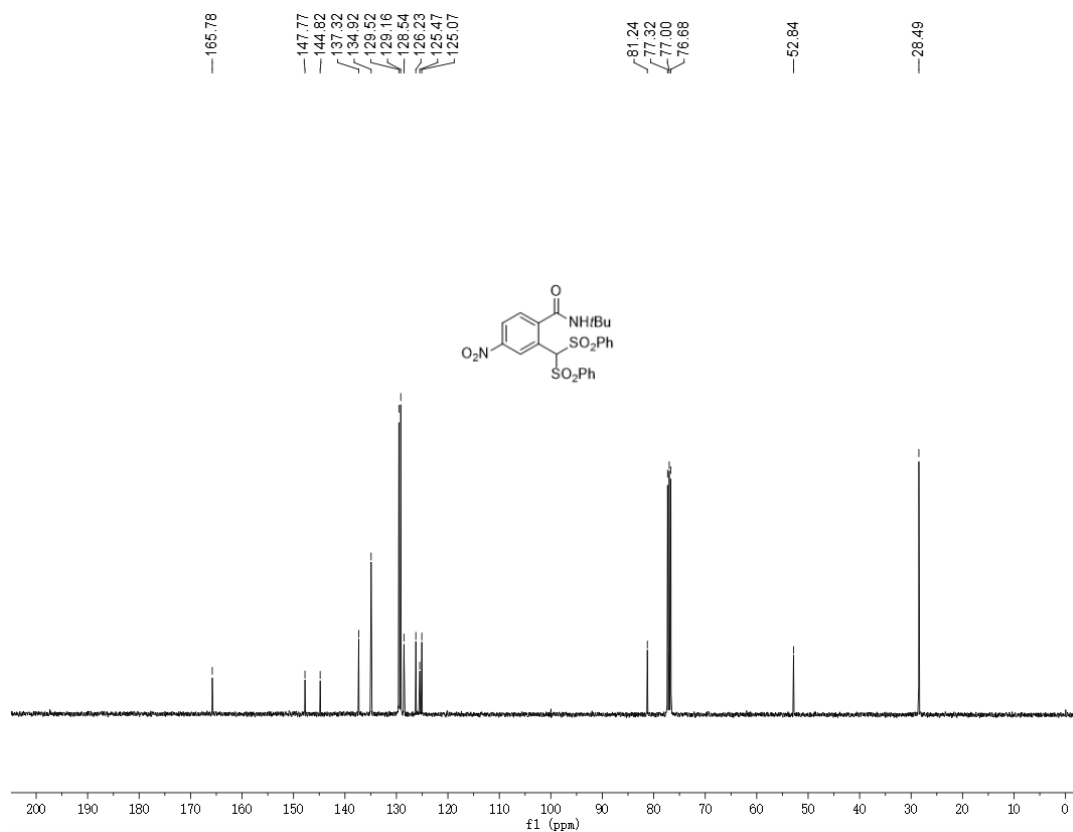

**<sup>1</sup>H NMR (400 MHz) Spectrum of 3n in CDCl<sub>3</sub>**

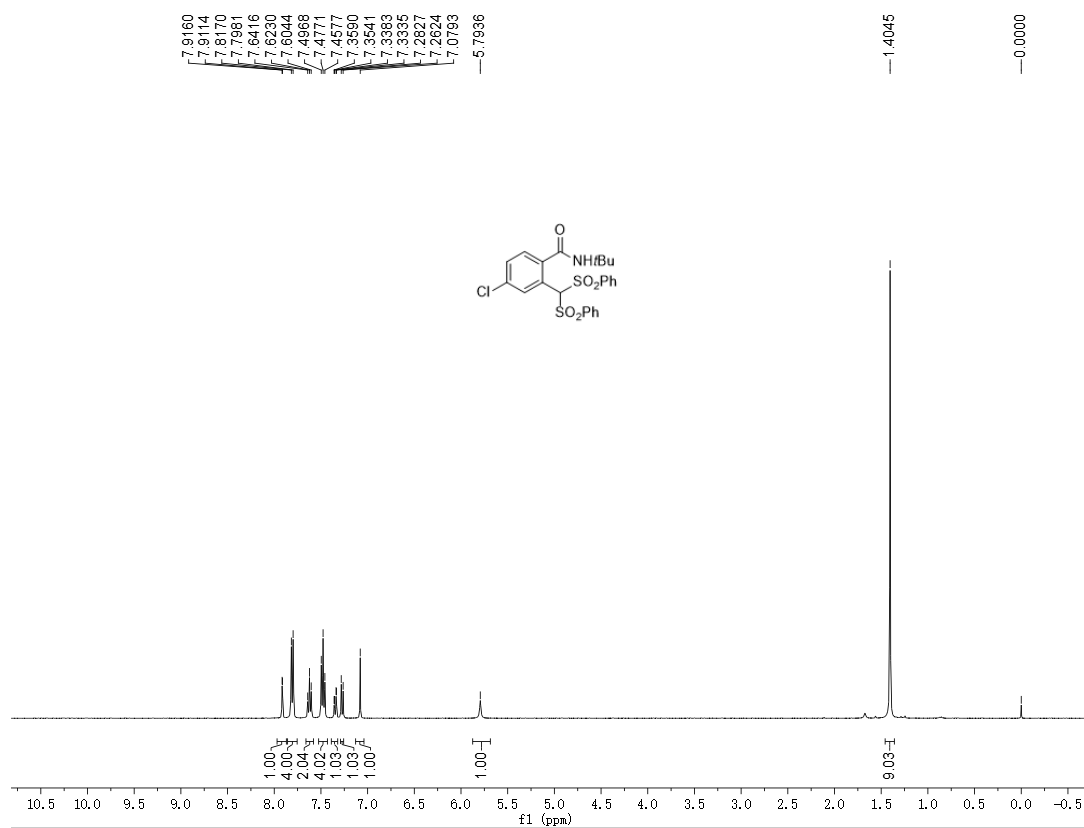

**<sup>13</sup>C{<sup>1</sup>H} NMR (101 MHz) Spectrum of 3n in CDCl<sub>3</sub>**

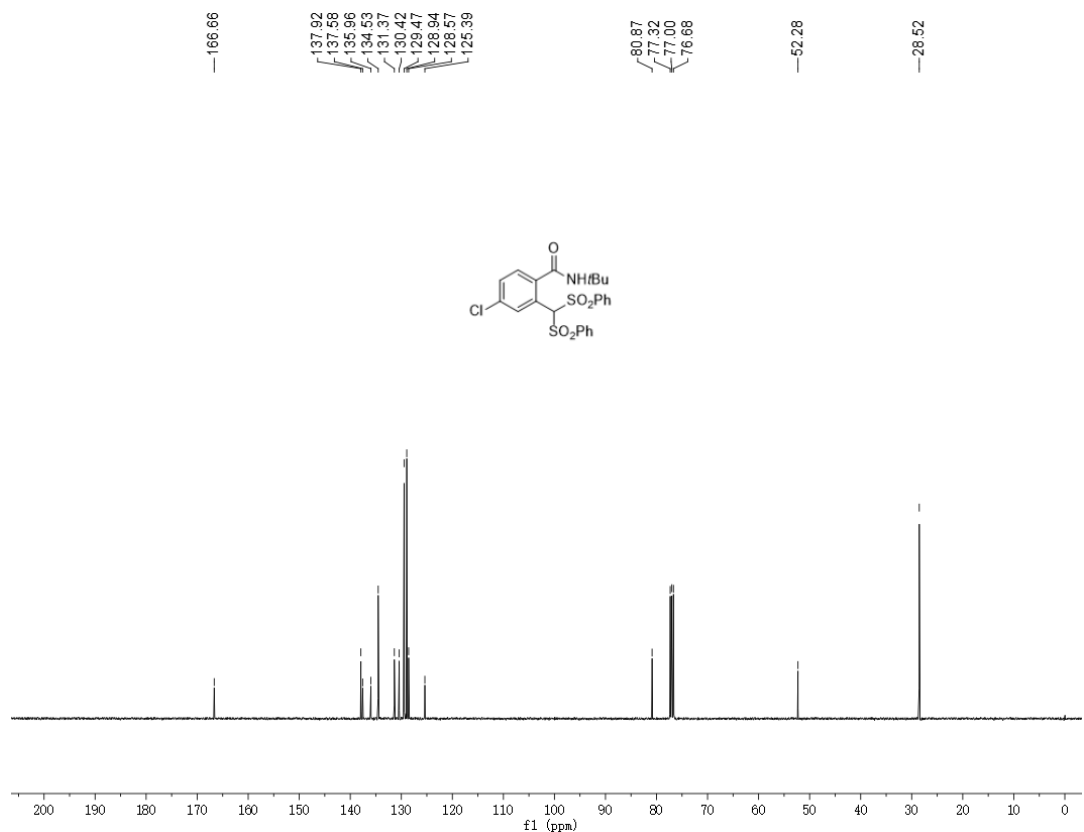

**<sup>1</sup>H NMR (400 MHz) Spectrum of 3o in CDCl<sub>3</sub>**

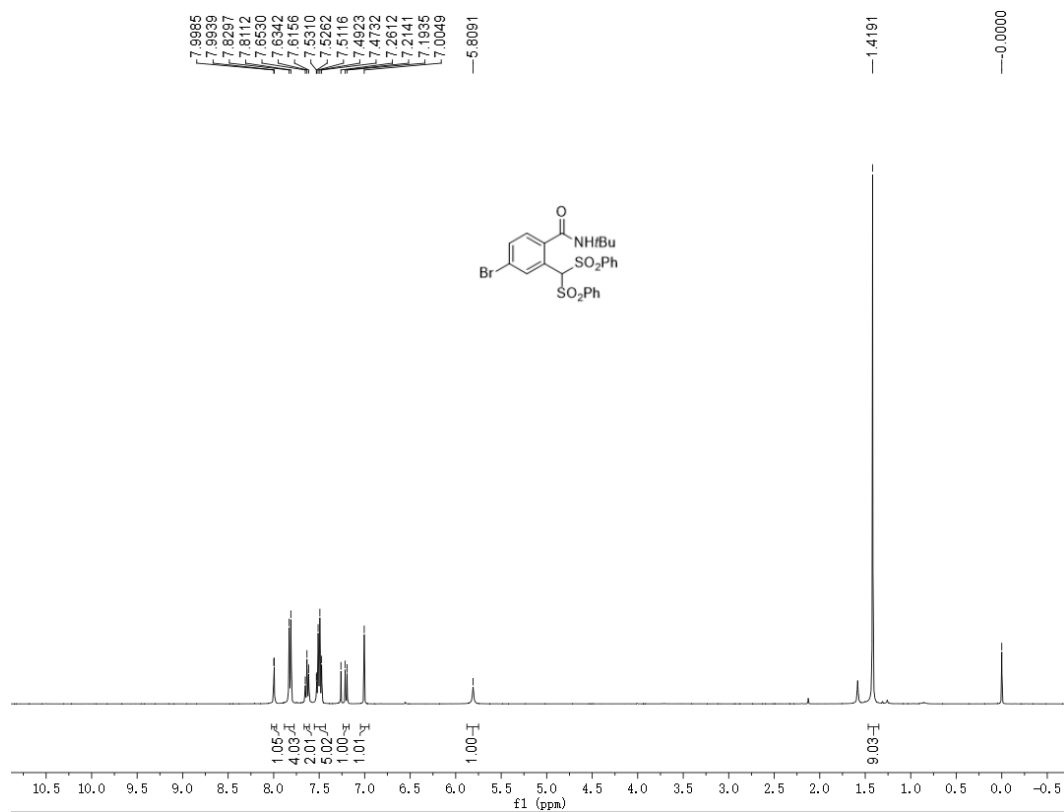

**<sup>13</sup>C{<sup>1</sup>H} NMR (101 MHz) Spectrum of 3o in CDCl<sub>3</sub>**

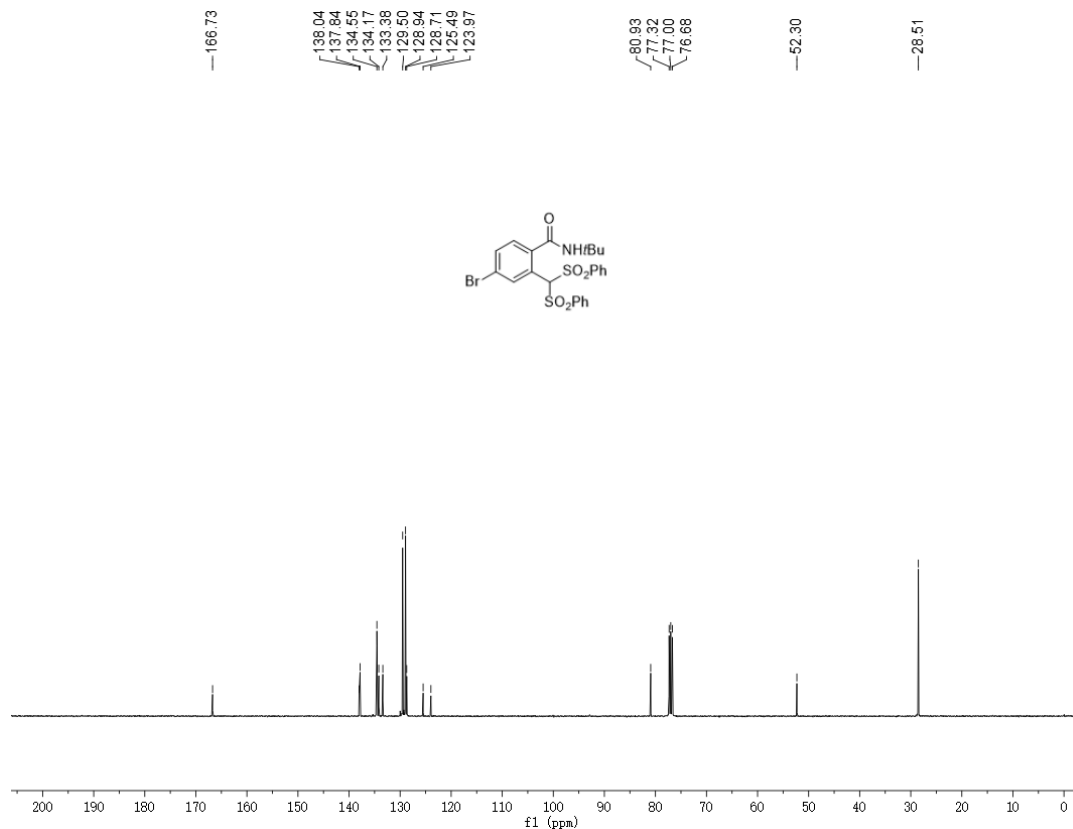

**<sup>1</sup>H NMR (400 MHz) Spectrum of 3p in CDCl<sub>3</sub>**

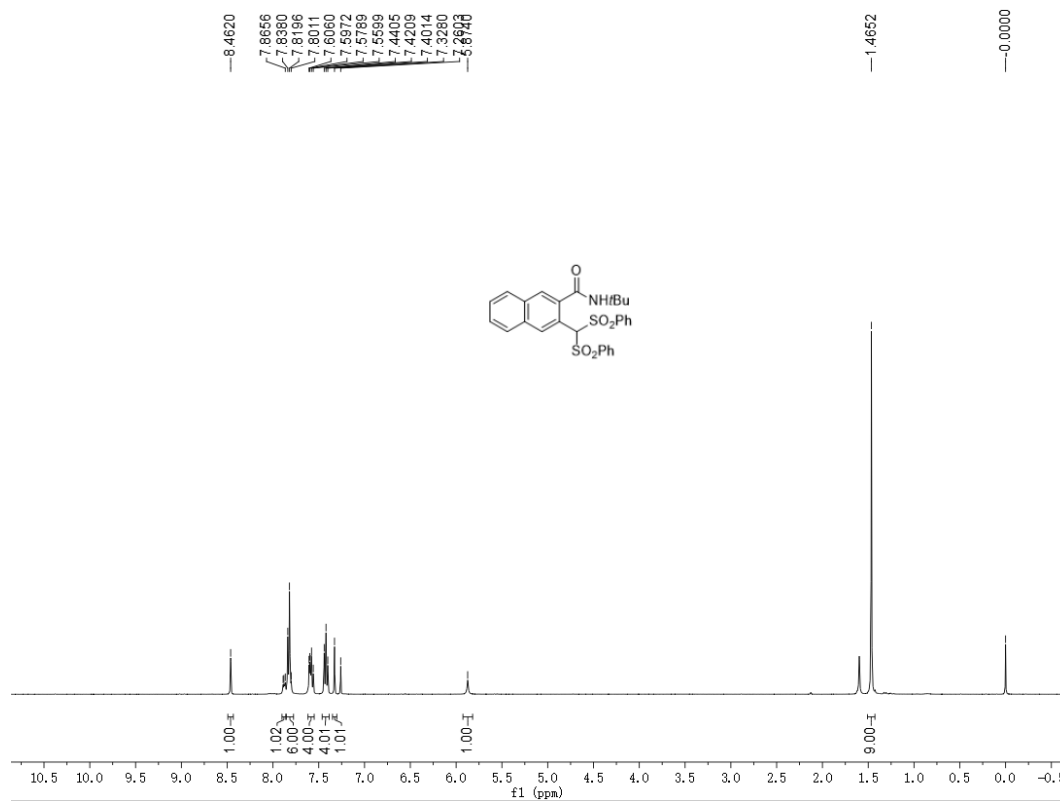

**<sup>13</sup>C{<sup>1</sup>H} NMR (101 MHz) Spectrum of 3p in CDCl<sub>3</sub>**

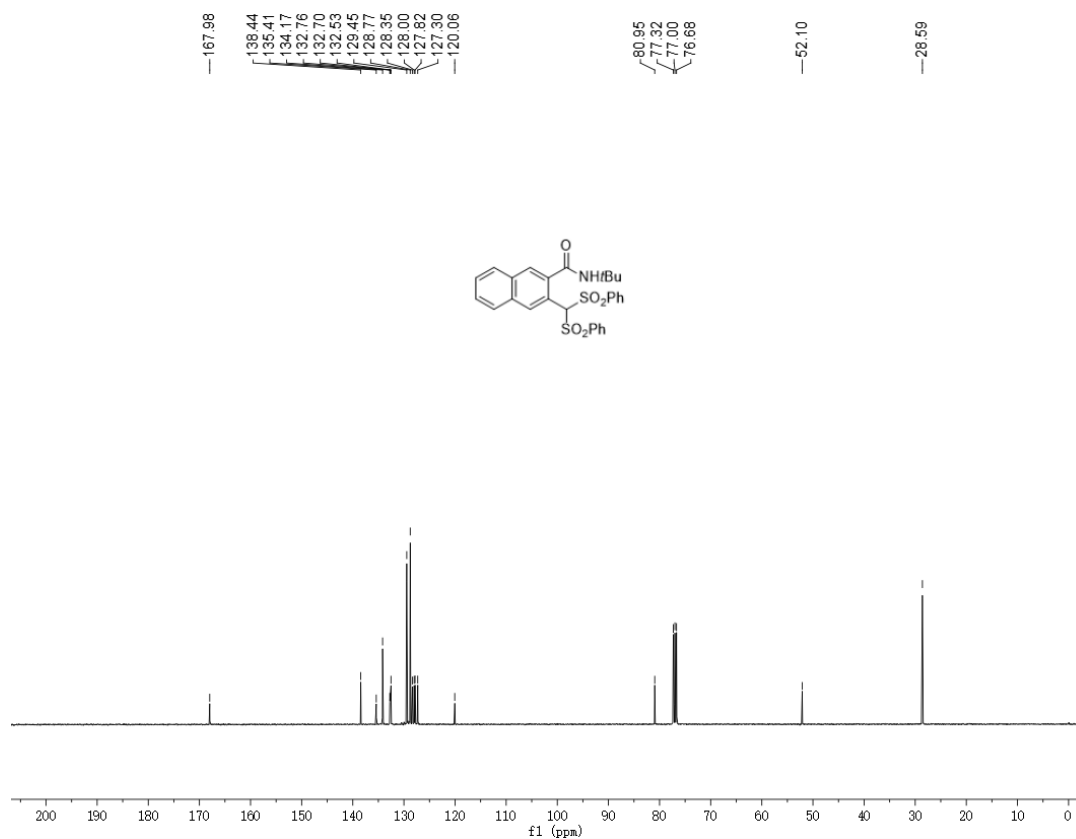

**<sup>1</sup>H NMR (400 MHz) Spectrum of 3q in CDCl<sub>3</sub>**

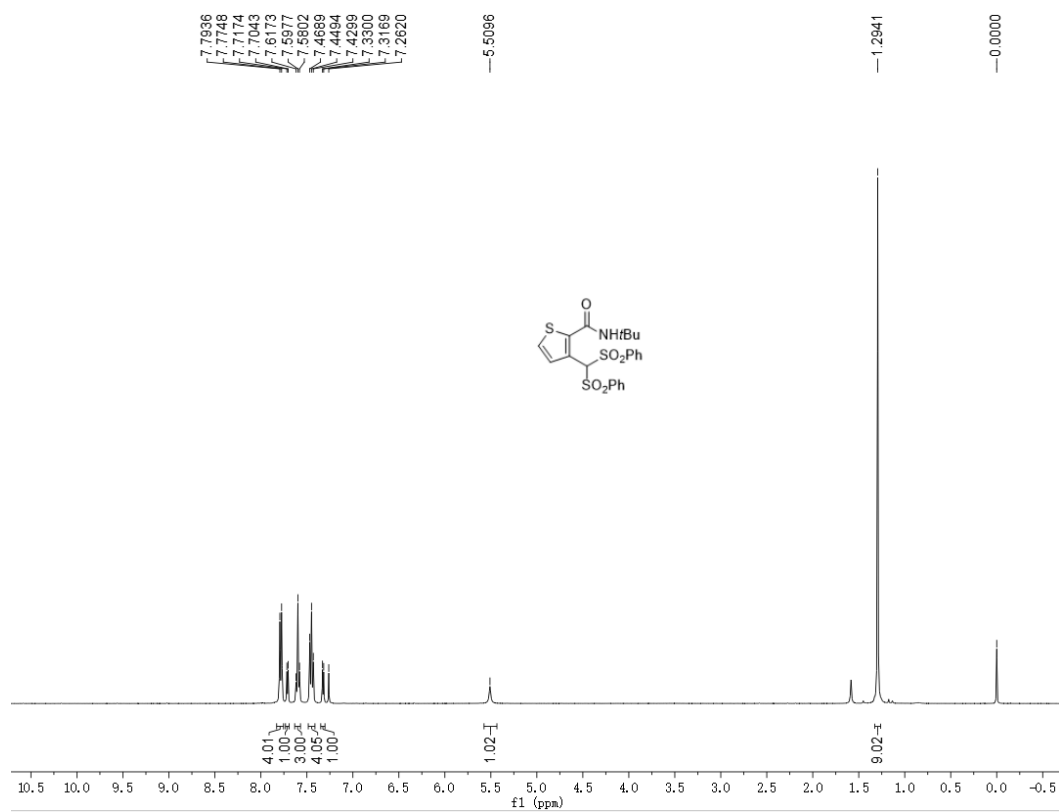

**<sup>13</sup>C{<sup>1</sup>H} NMR (101 MHz) Spectrum of 3q in CDCl<sub>3</sub>**

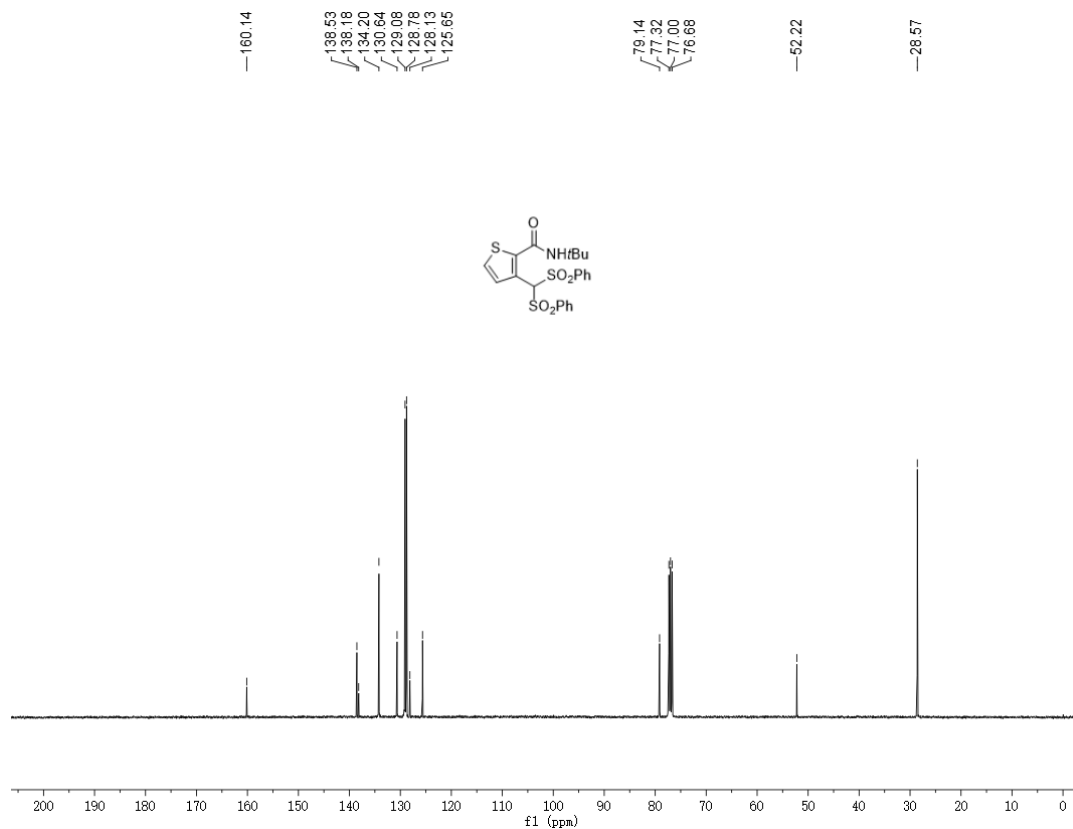



**<sup>1</sup>H NMR (400 MHz) Spectrum of 5a in CDCl<sub>3</sub>**

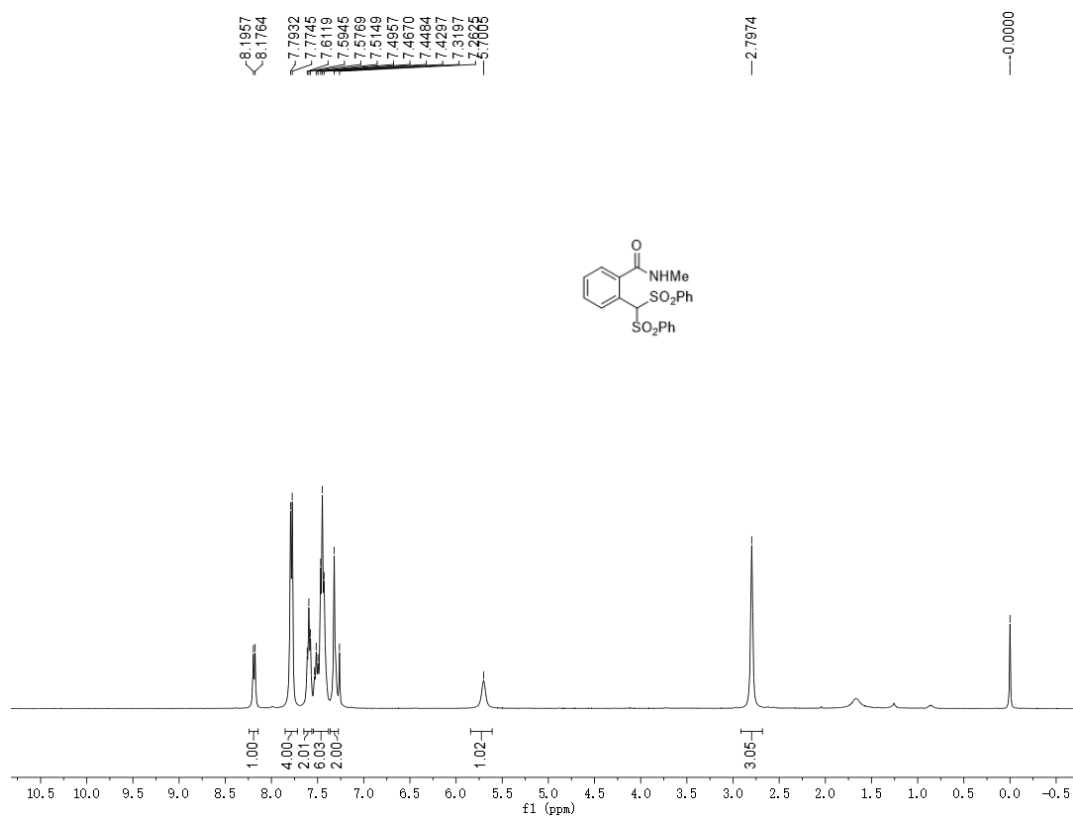

**<sup>13</sup>C{<sup>1</sup>H} NMR (101 MHz) Spectrum of 5a in CDCl<sub>3</sub>**

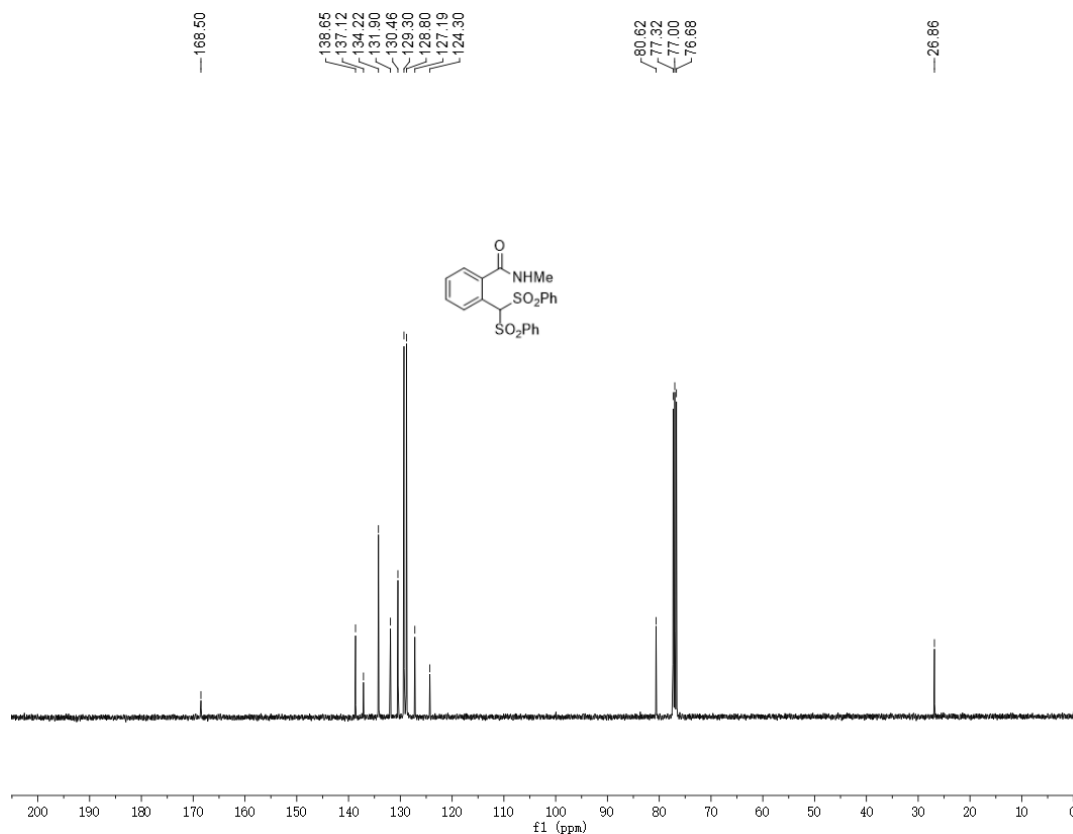

**<sup>1</sup>H NMR (400 MHz) Spectrum of 5b in CDCl<sub>3</sub>**

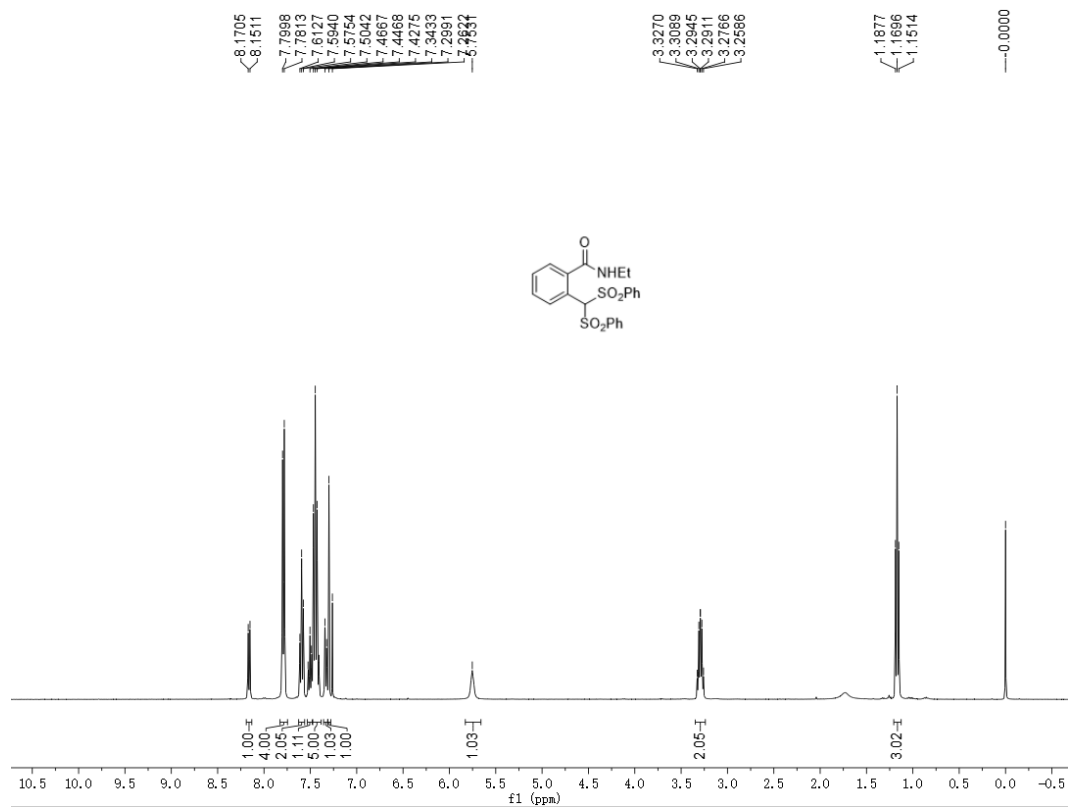

**<sup>13</sup>C{<sup>1</sup>H} NMR (101 MHz) Spectrum of 5b in CDCl<sub>3</sub>**

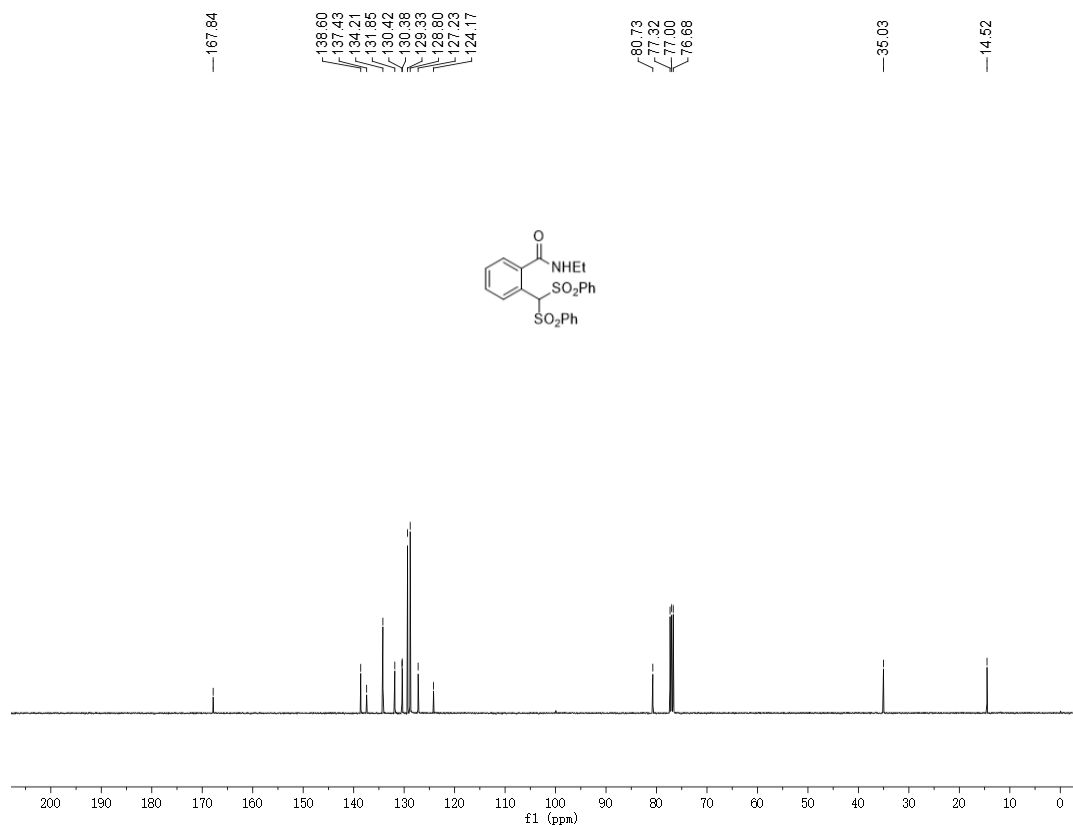

**<sup>1</sup>H NMR (400 MHz) Spectrum of 5c in CDCl<sub>3</sub>**

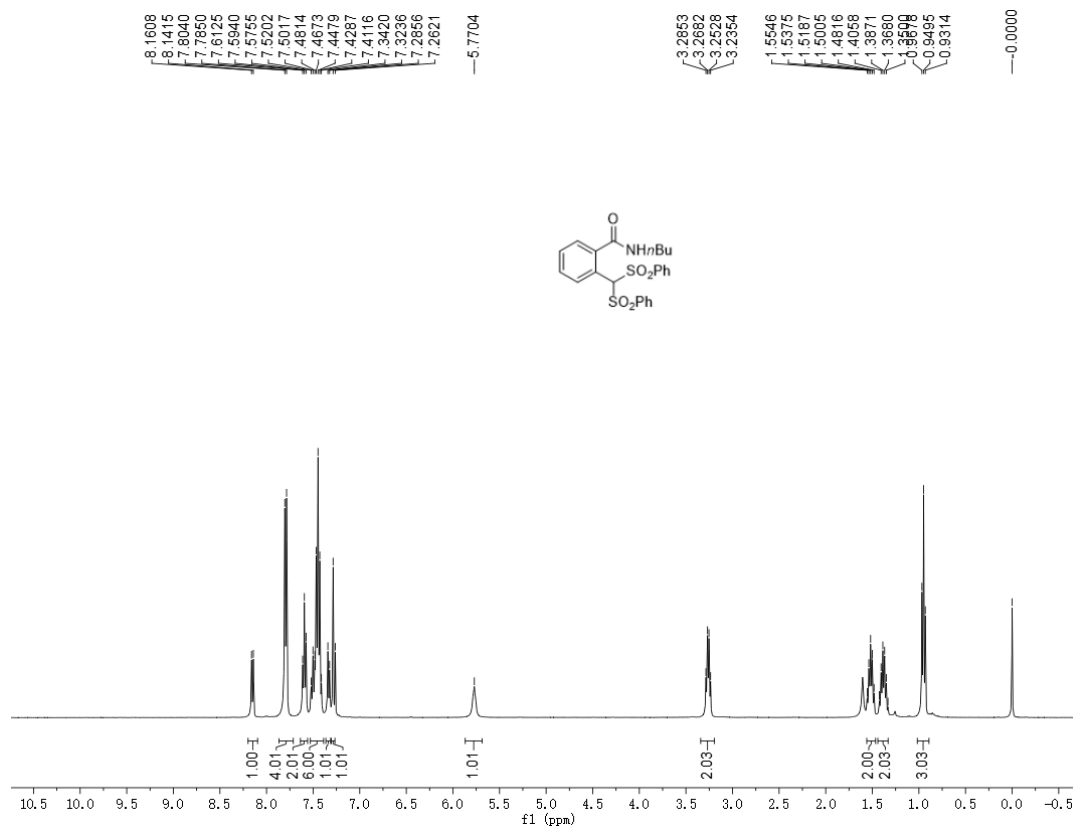

**<sup>13</sup>C{<sup>1</sup>H} NMR (101 MHz) Spectrum of 5c in CDCl<sub>3</sub>**

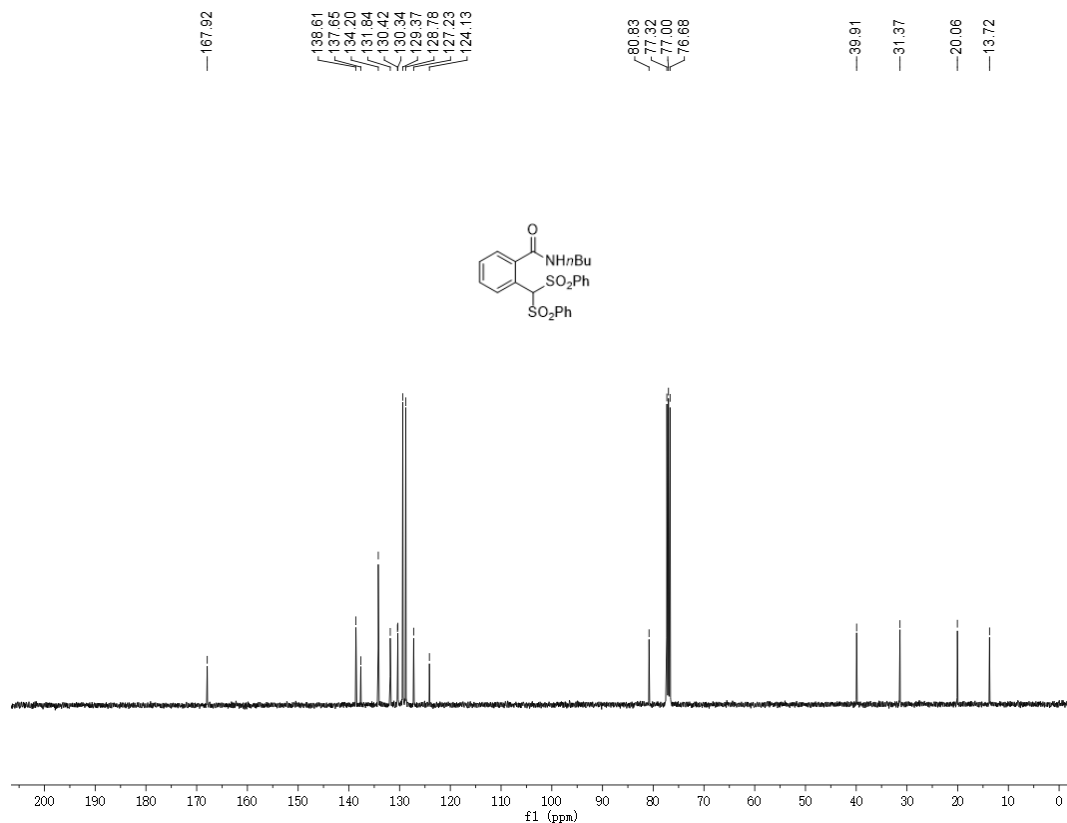

**<sup>1</sup>H NMR (400 MHz) Spectrum of 5d in CDCl<sub>3</sub>**

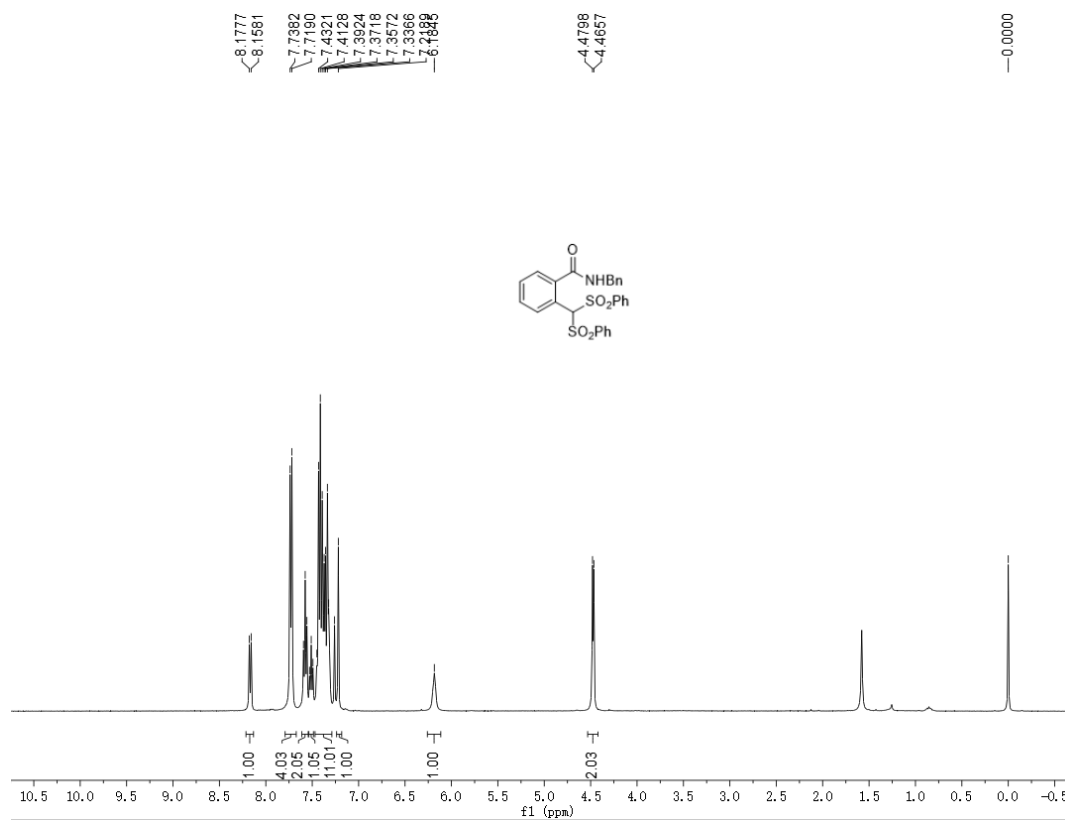

**<sup>13</sup>C{<sup>1</sup>H} NMR (101 MHz) Spectrum of 5d in CDCl<sub>3</sub>**

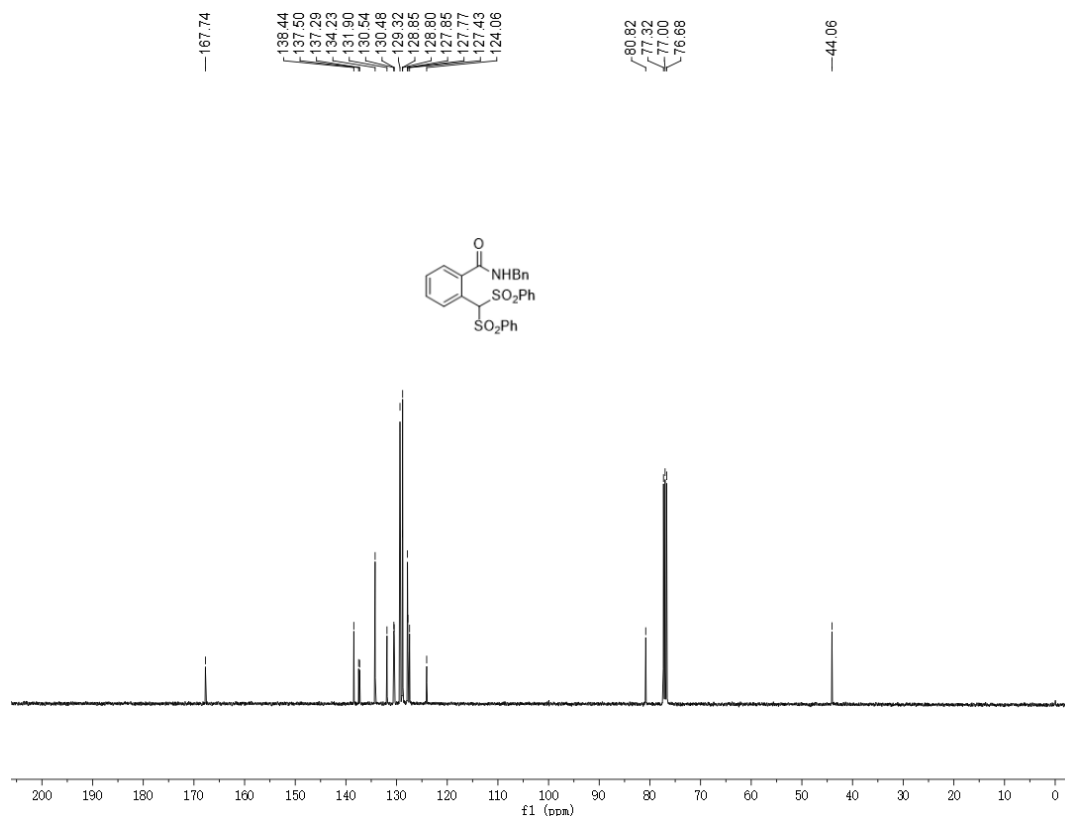

**<sup>1</sup>H NMR (400 MHz) Spectrum of 5e in CDCl<sub>3</sub>**

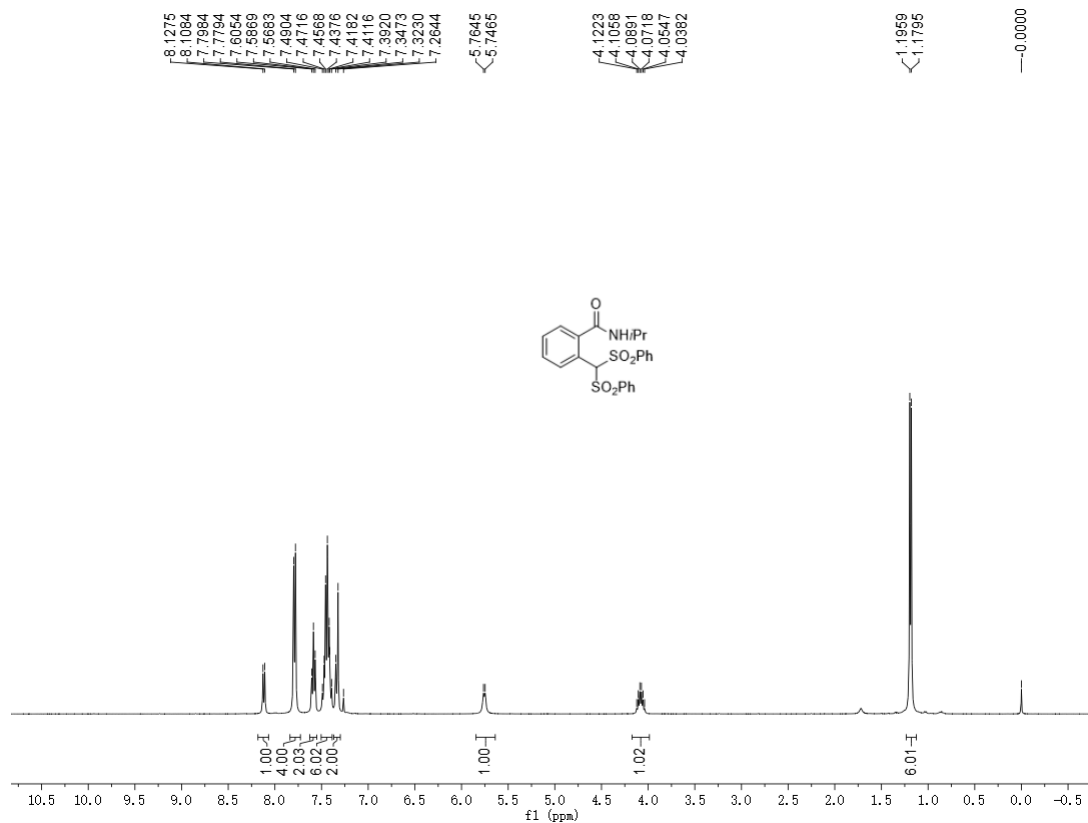

**<sup>13</sup>C{<sup>1</sup>H} NMR (101 MHz) Spectrum of 5e in CDCl<sub>3</sub>**

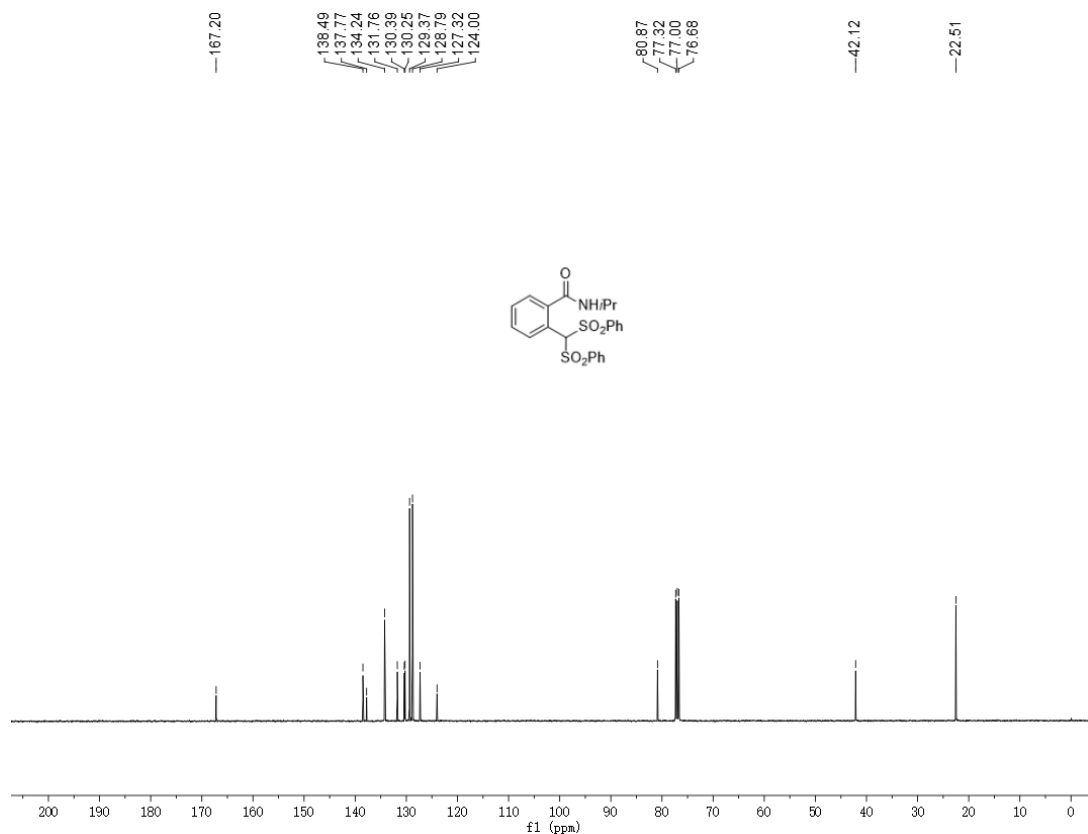

### <sup>1</sup>H NMR (400 MHz) Spectrum of 5f in CDCl<sub>3</sub>

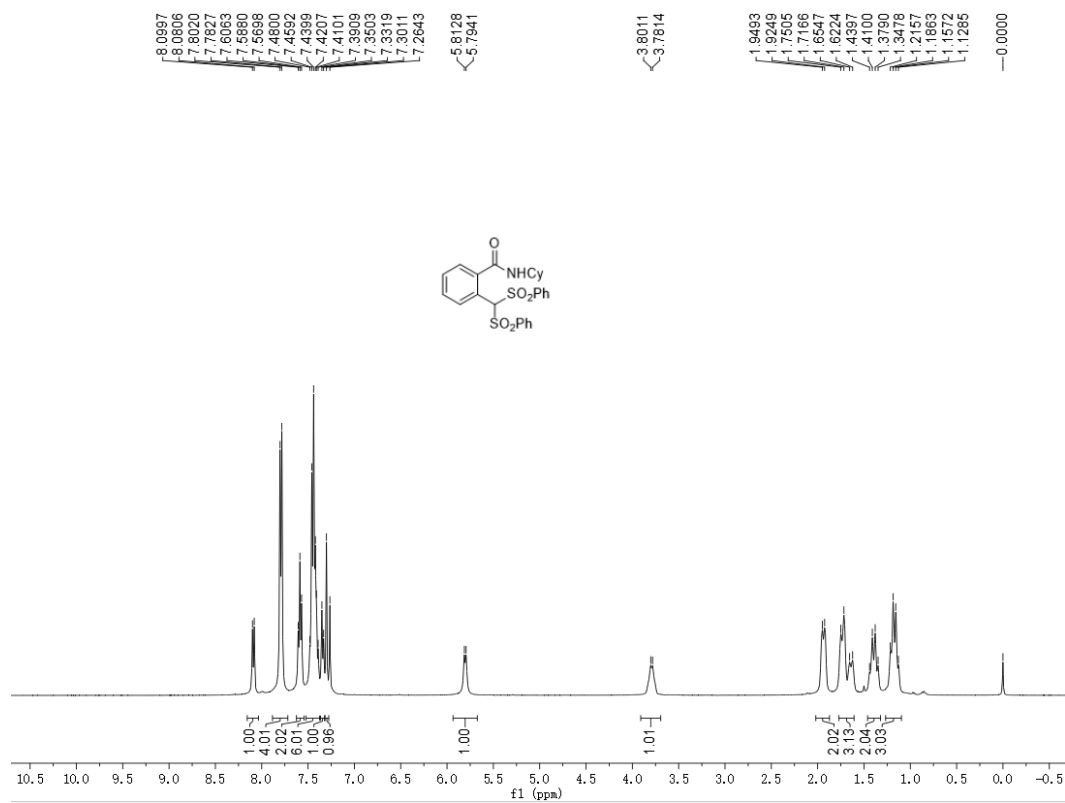

### <sup>13</sup>C{<sup>1</sup>H} NMR (101 MHz) Spectrum of 5f in CDCl<sub>3</sub>

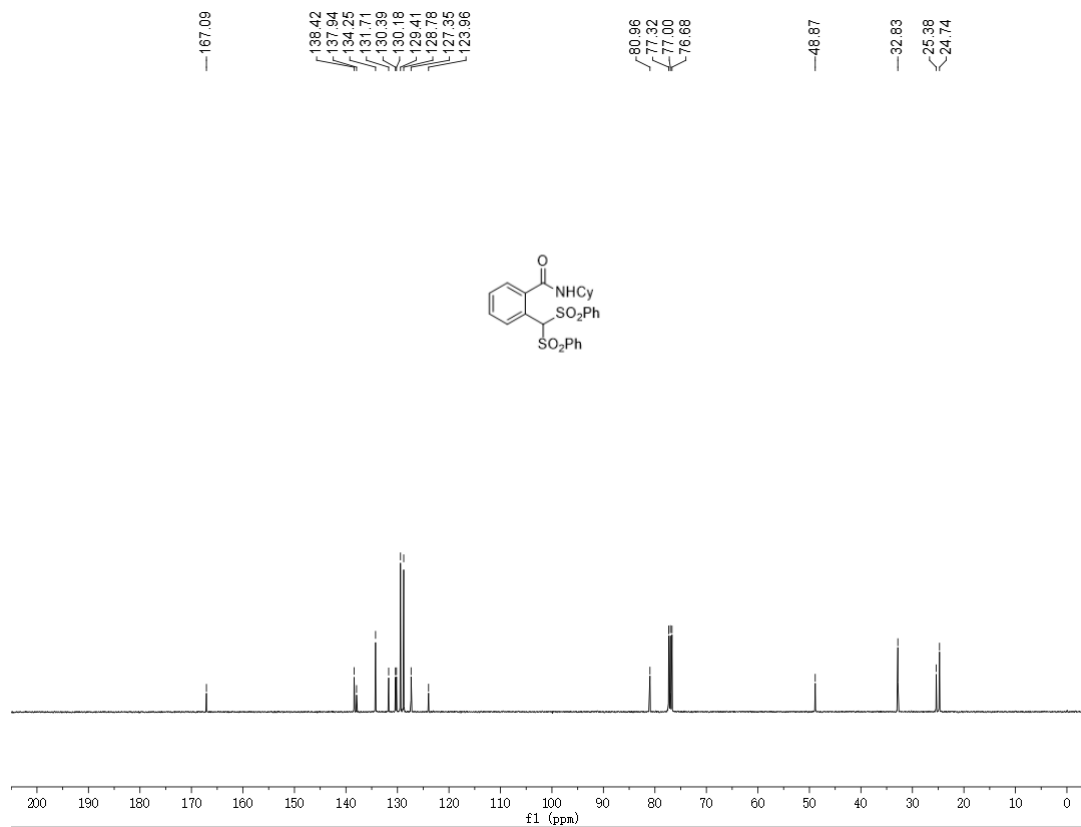

**<sup>1</sup>H NMR (400 MHz) Spectrum of 5g in CDCl<sub>3</sub>**

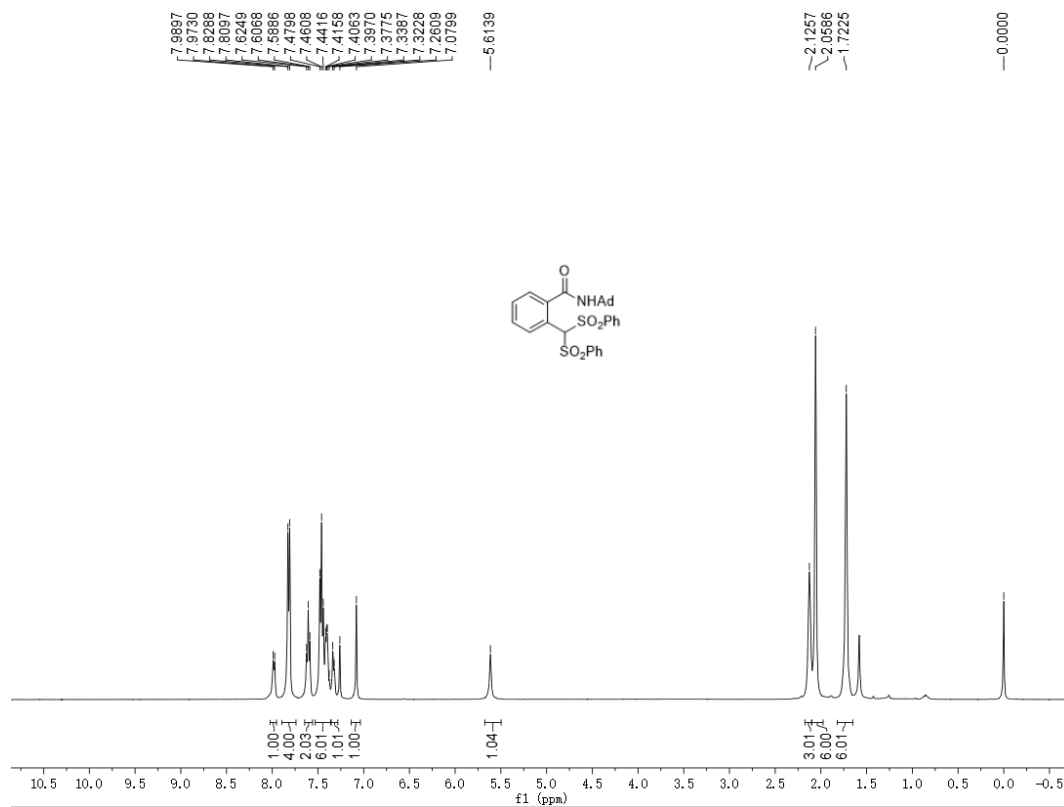

**<sup>13</sup>C{<sup>1</sup>H} NMR (101 MHz) Spectrum of 5g in CDCl<sub>3</sub>**

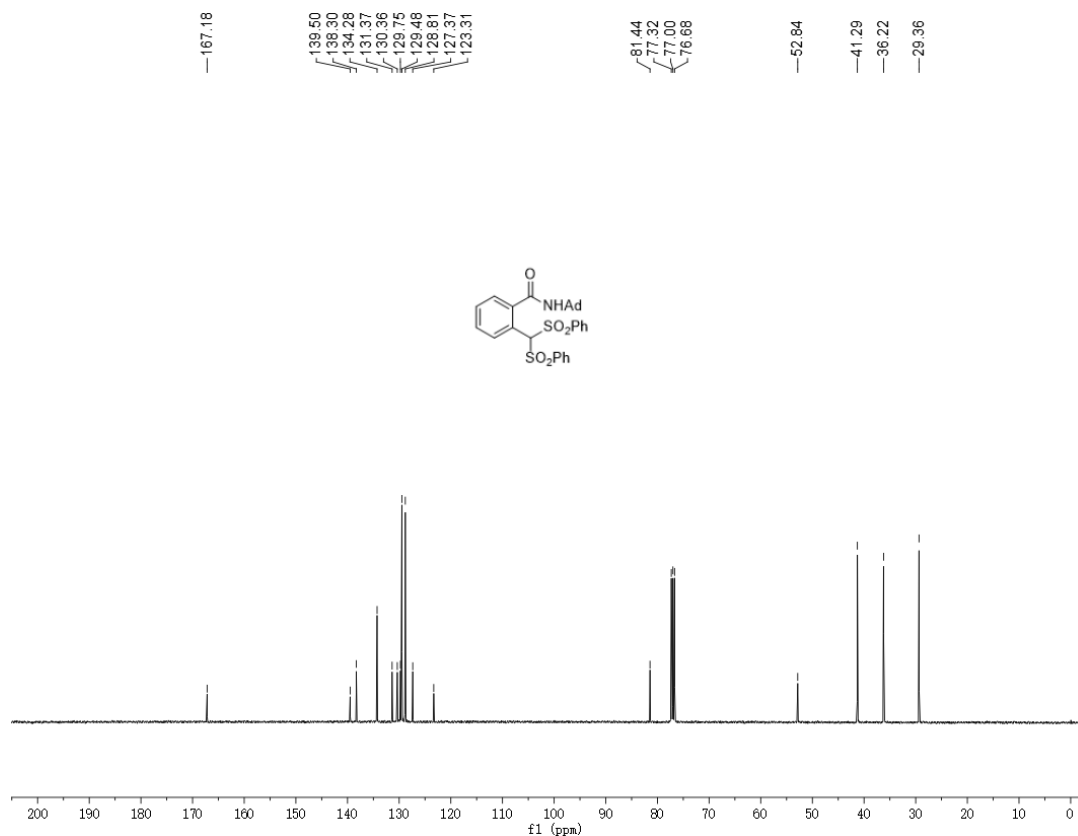

**<sup>1</sup>H NMR (500 MHz) Spectrum of 5h in acetone-*d*<sub>6</sub>**

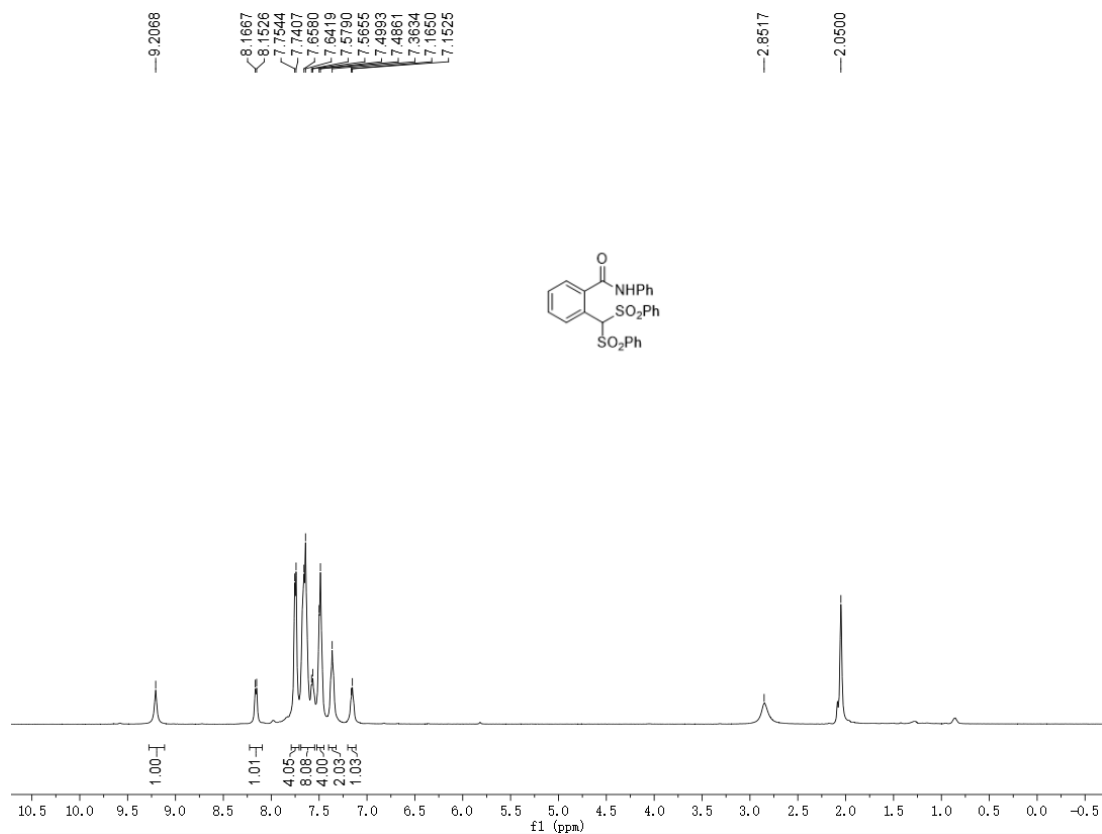

**<sup>13</sup>C{<sup>1</sup>H} NMR (126 MHz) Spectrum of 5h in acetone-*d*<sub>6</sub>**

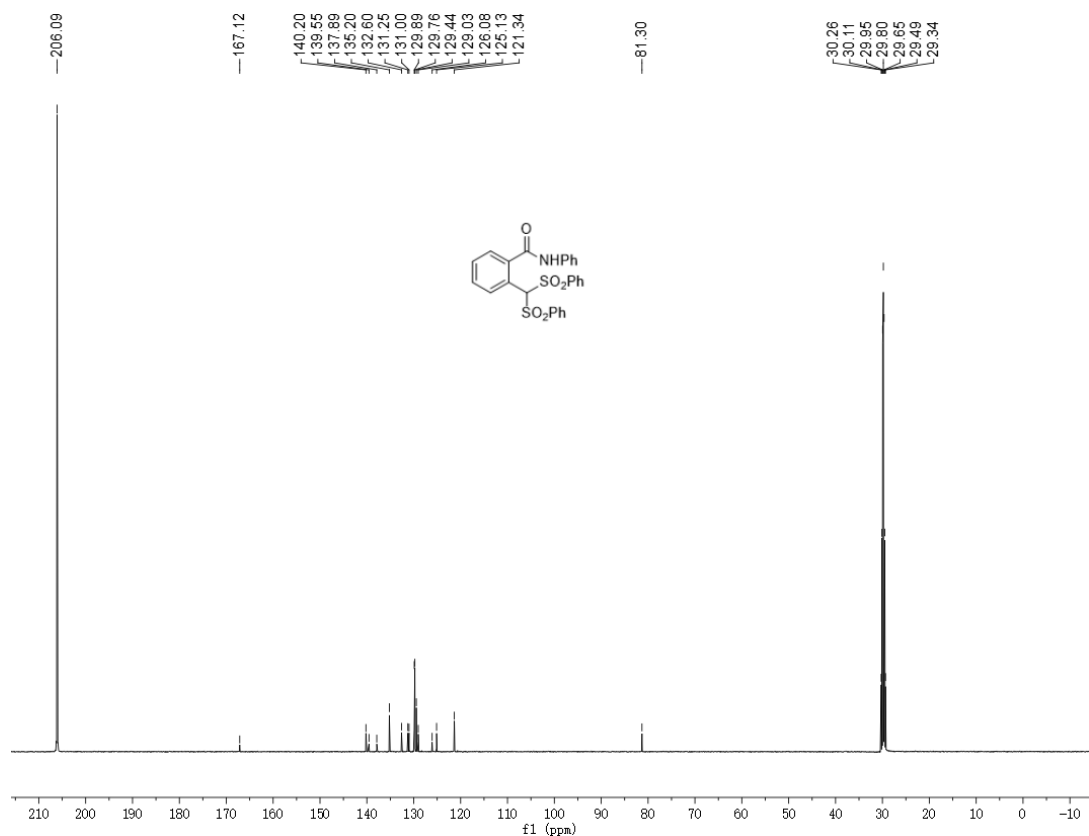



**<sup>1</sup>H NMR (400 MHz) Spectrum of 6a in CDCl<sub>3</sub>**

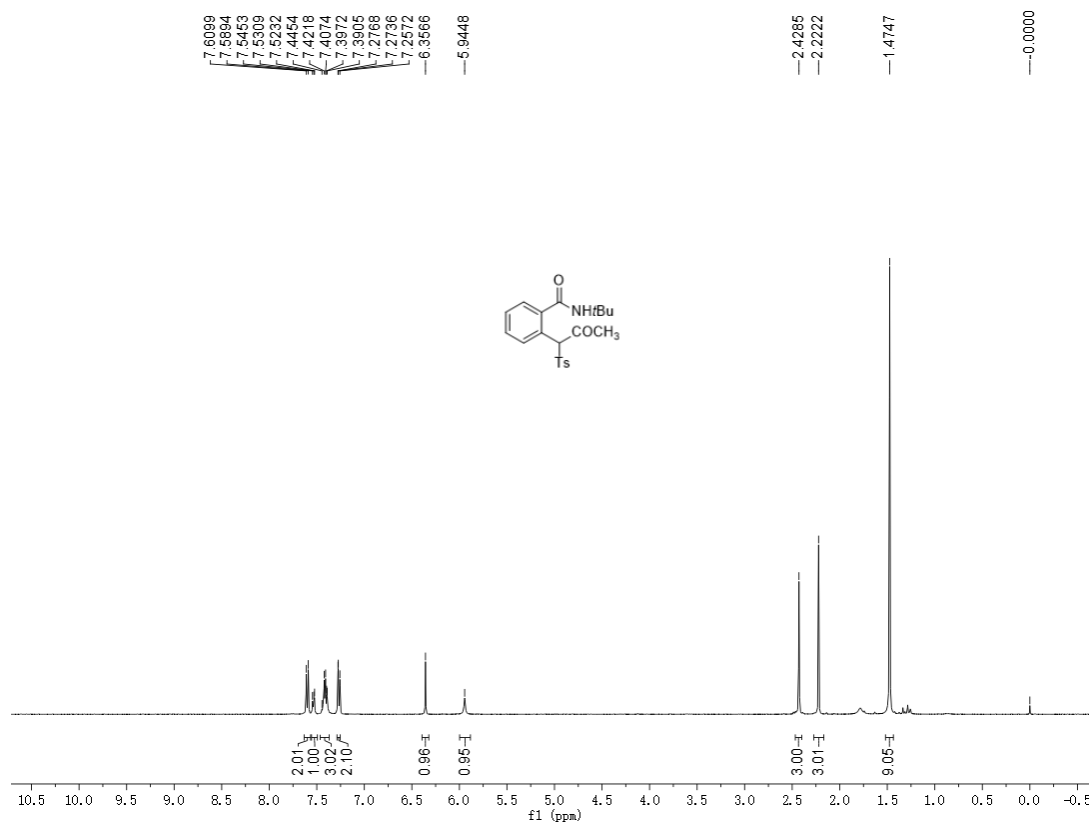

**<sup>13</sup>C{<sup>1</sup>H} NMR (101 MHz) Spectrum of 6a in CDCl<sub>3</sub>**

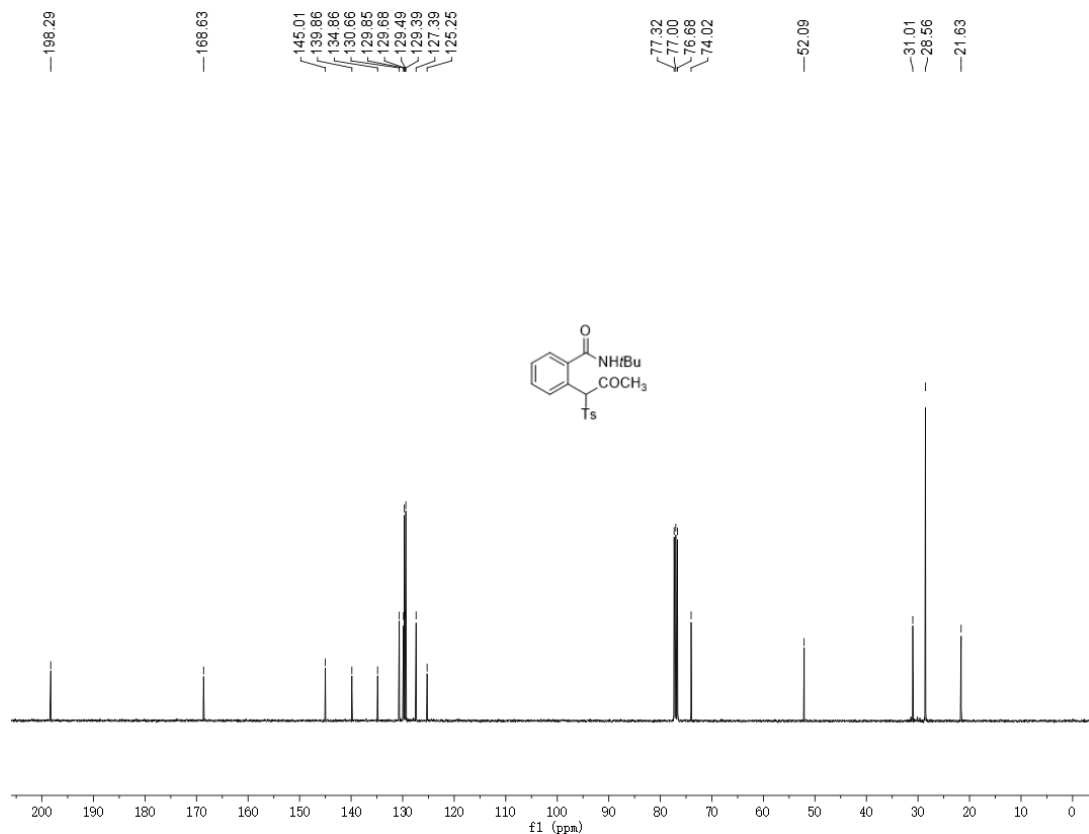

**<sup>1</sup>H NMR (400 MHz) Spectrum of 6b in CDCl<sub>3</sub>**

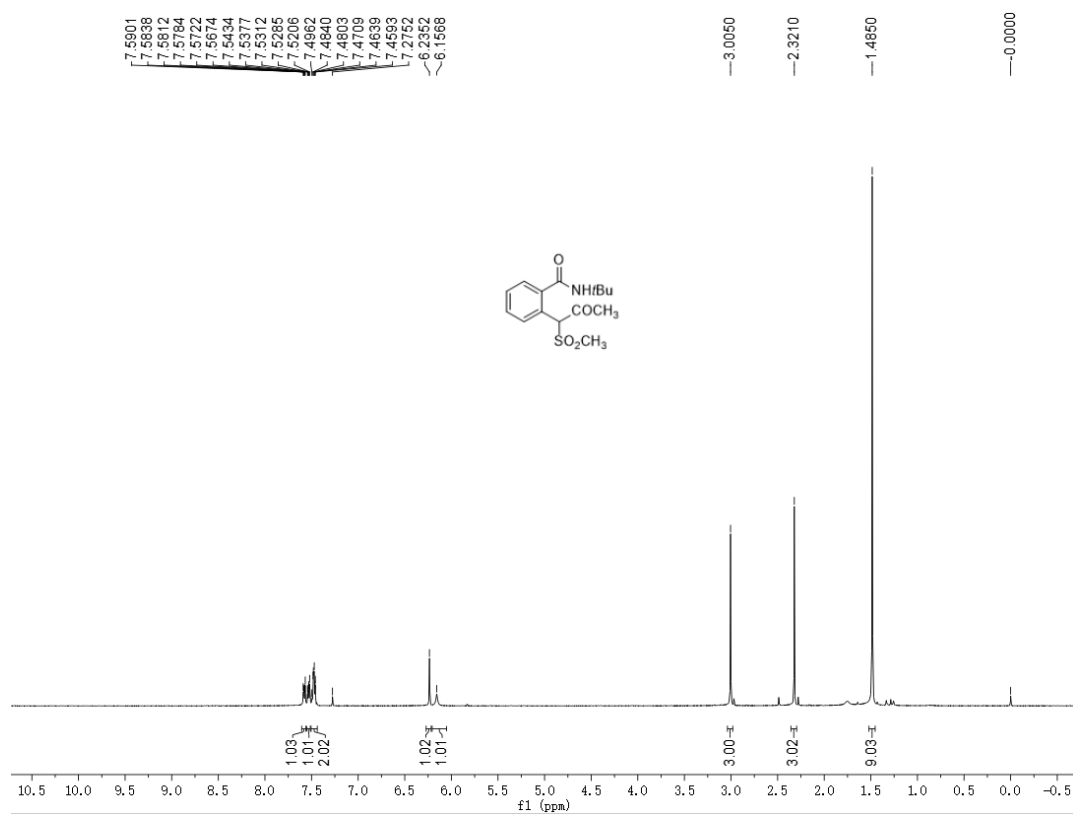

**<sup>13</sup>C{<sup>1</sup>H} NMR (101 MHz) Spectrum of 6b in CDCl<sub>3</sub>**

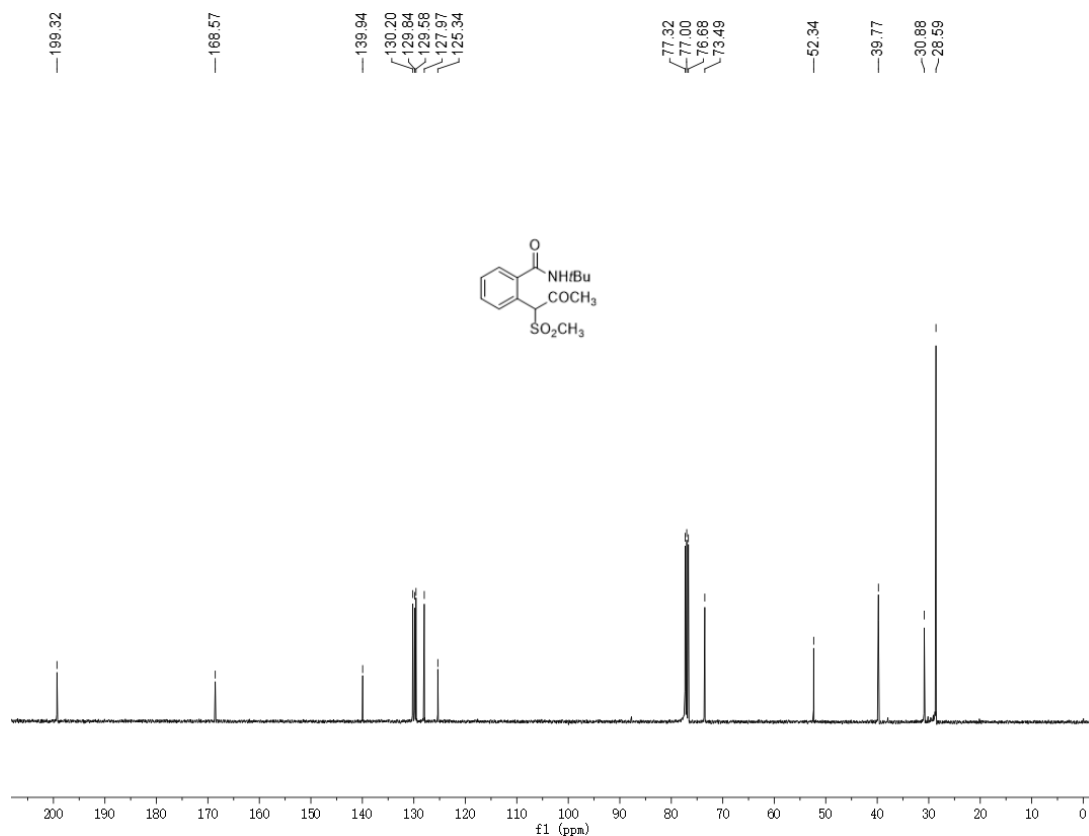

**<sup>1</sup>H NMR (400 MHz) Spectrum of 6c in CDCl<sub>3</sub>**

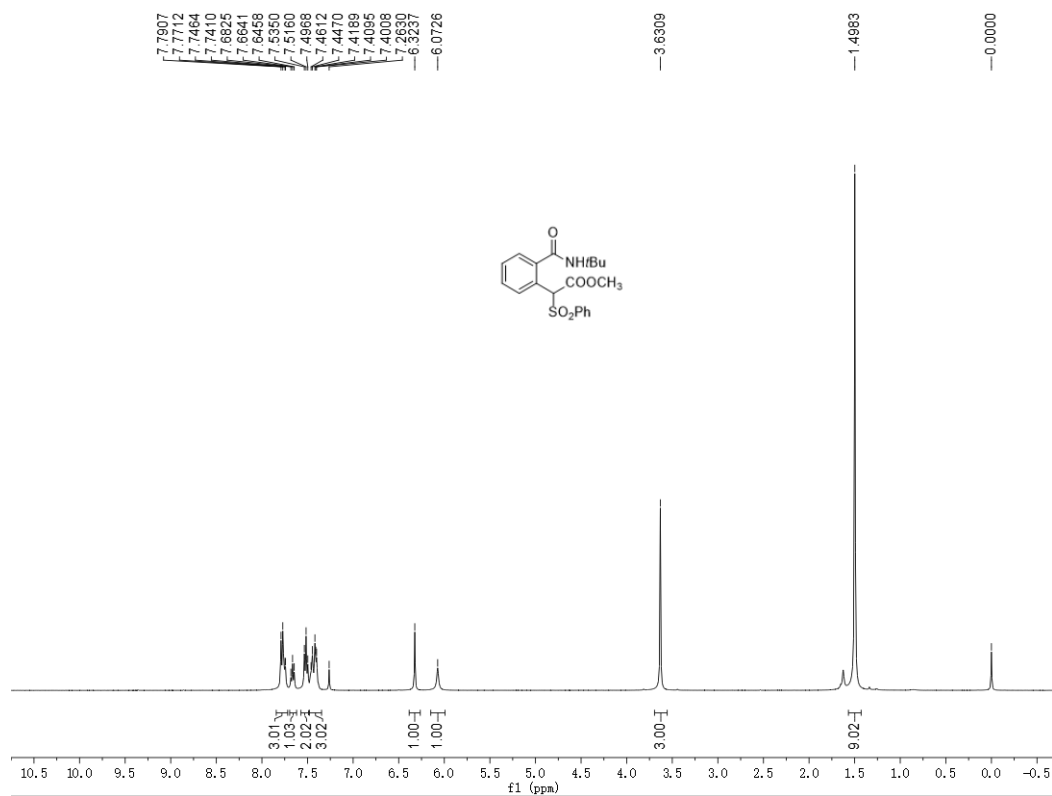

**<sup>13</sup>C{<sup>1</sup>H} NMR (101 MHz) Spectrum of 6c in CDCl<sub>3</sub>**

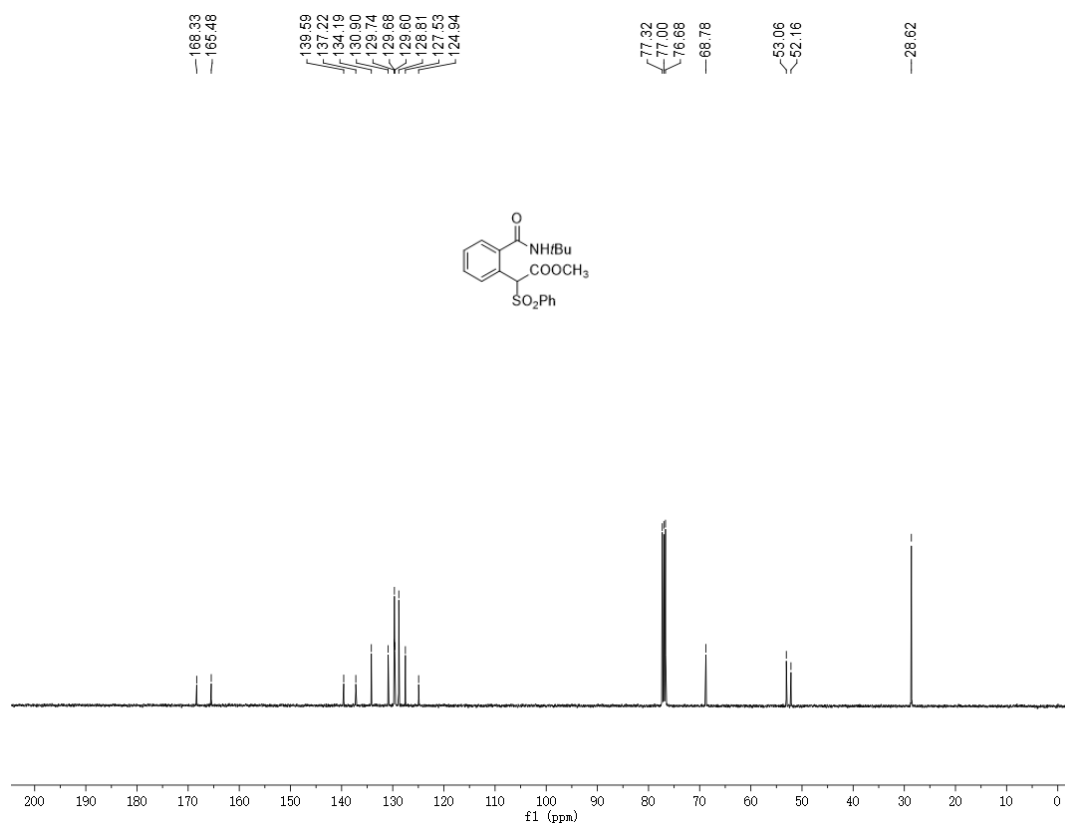

**<sup>1</sup>H NMR (400 MHz) Spectrum of 6d in CDCl<sub>3</sub>**

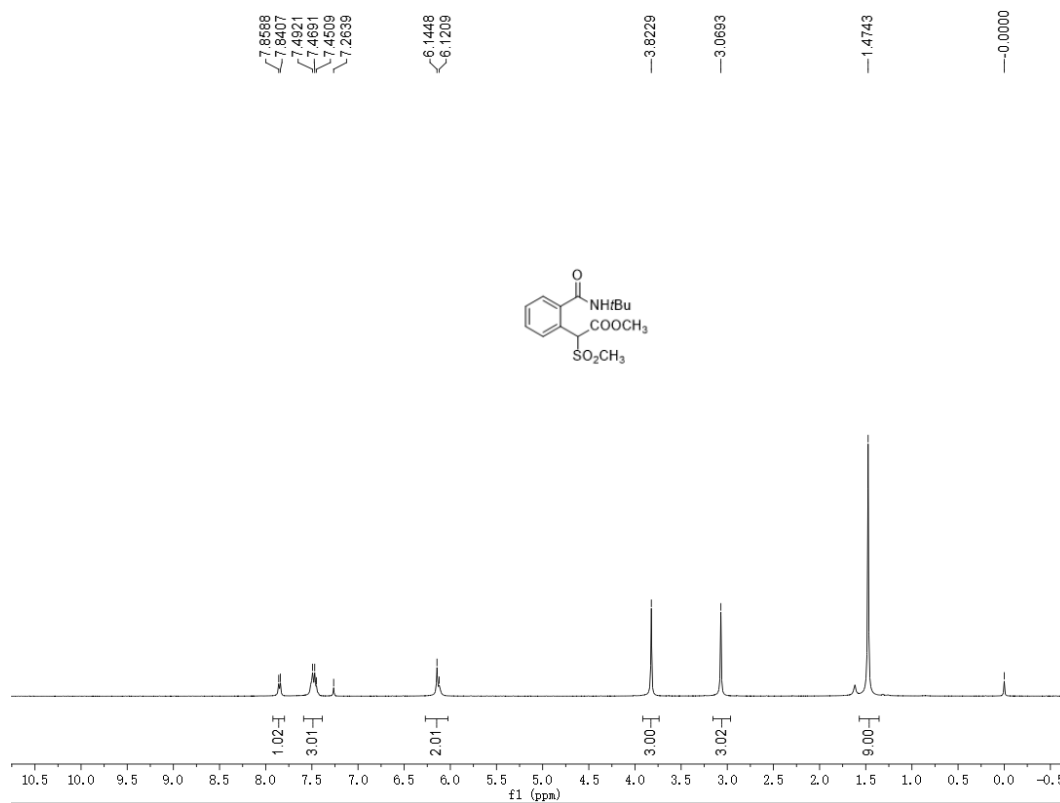

**<sup>13</sup>C{<sup>1</sup>H} NMR (101 MHz) Spectrum of 6d in CDCl<sub>3</sub>**

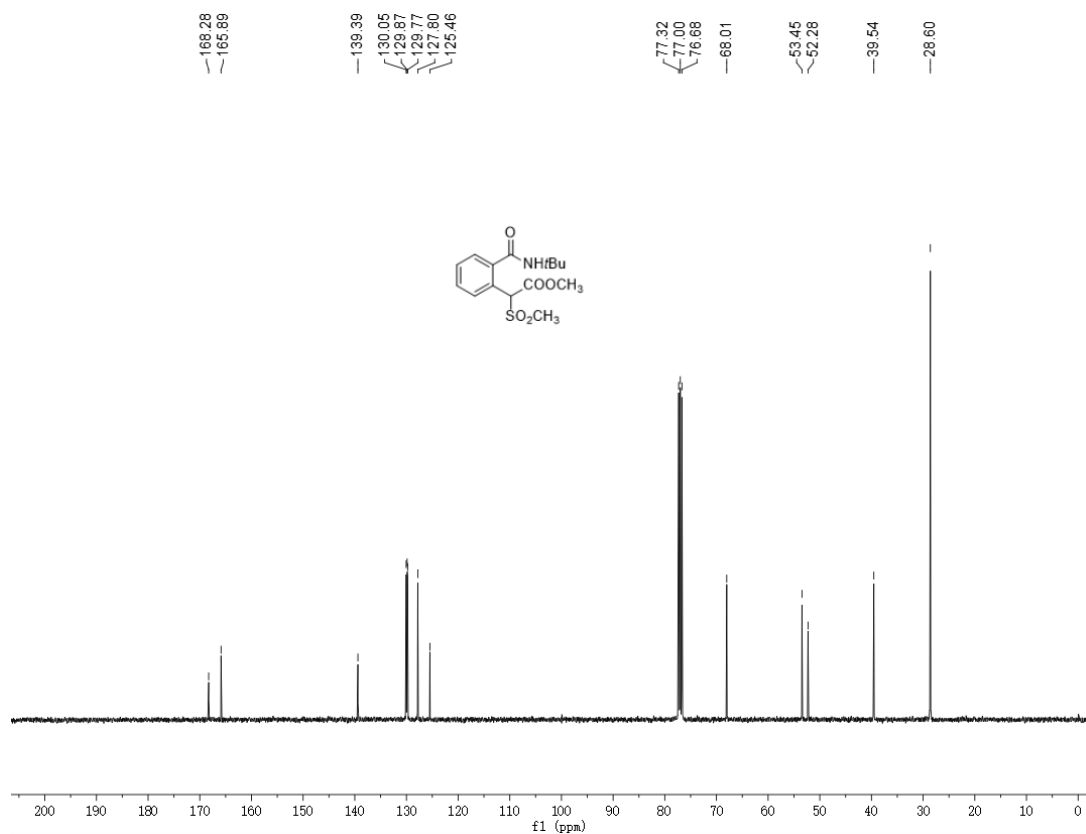

**<sup>1</sup>H NMR (400 MHz) Spectrum of 7 in CDCl<sub>3</sub>**

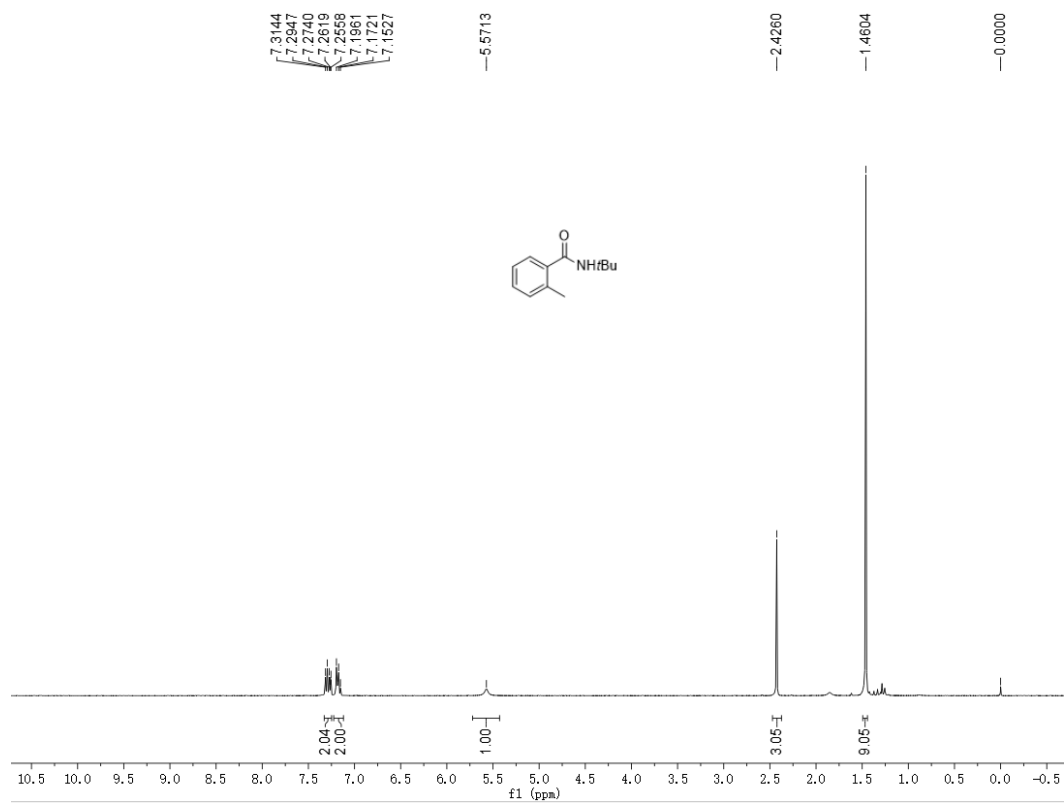

**<sup>13</sup>C{<sup>1</sup>H} NMR (101 MHz) Spectrum of 7 in CDCl<sub>3</sub>**

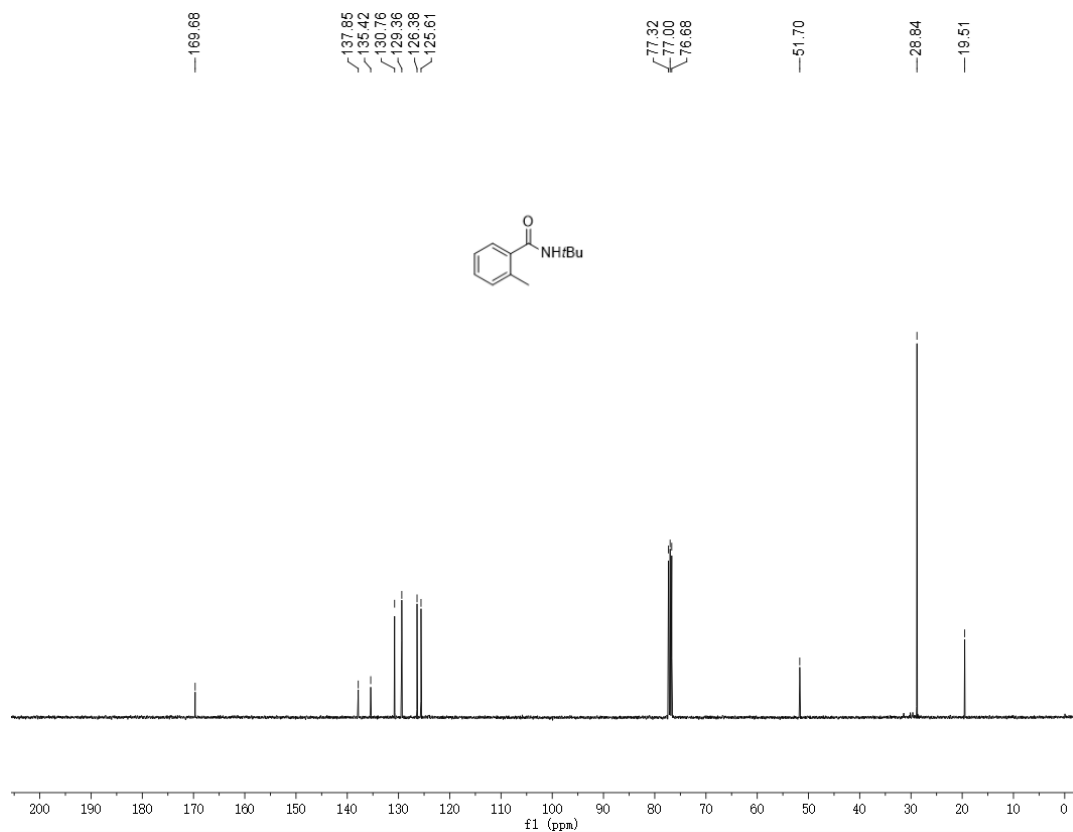

**<sup>1</sup>H NMR (400 MHz) Spectrum of 8 in CDCl<sub>3</sub>**

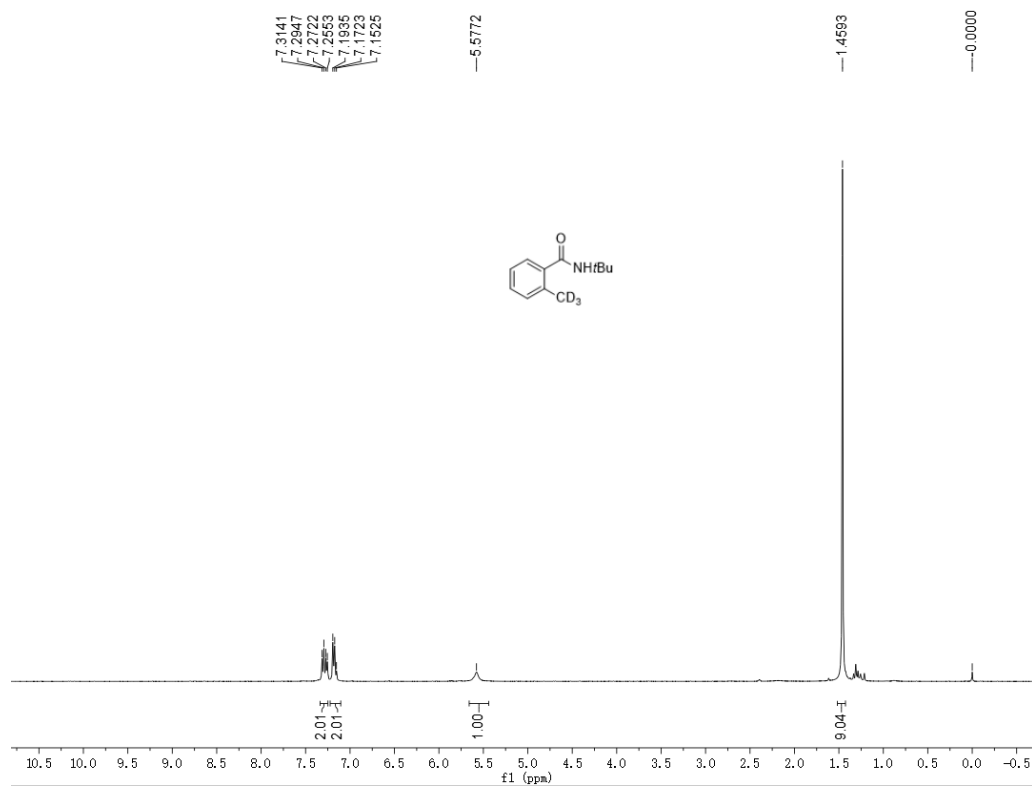

**<sup>13</sup>C{<sup>1</sup>H} NMR (101 MHz) Spectrum of 8 in CDCl<sub>3</sub>**

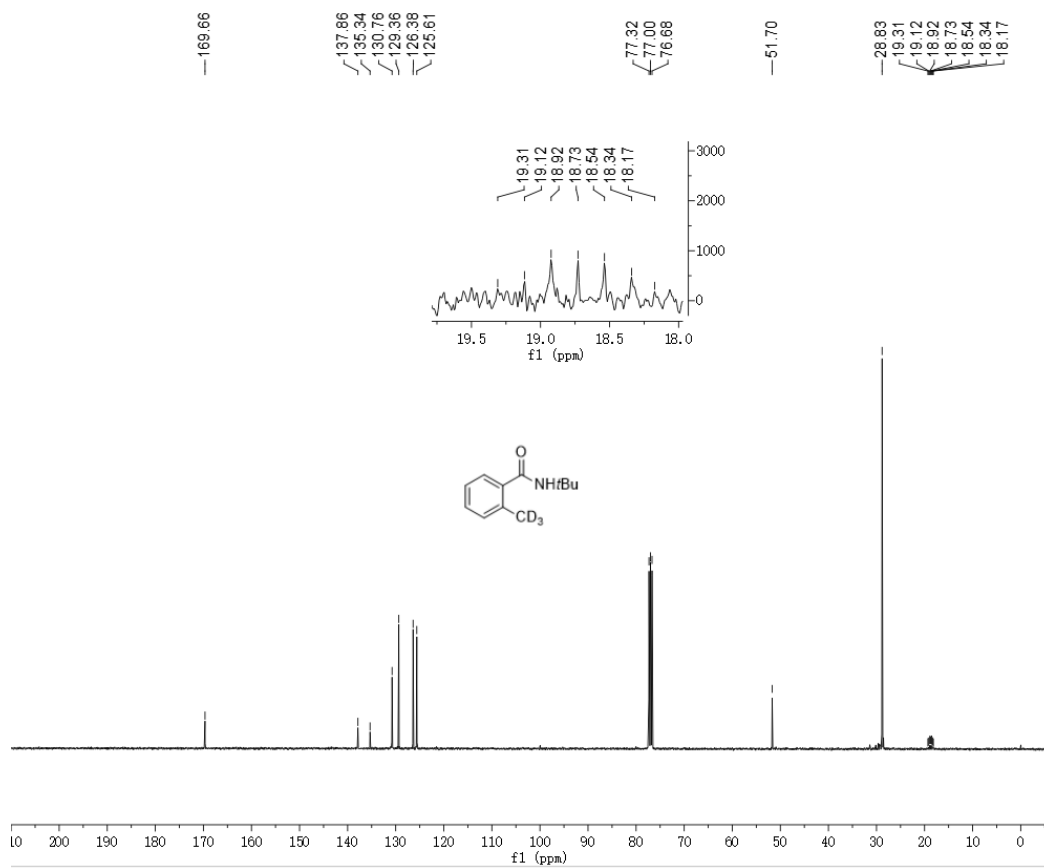

**<sup>1</sup>H NMR (500 MHz) Spectrum of 9 in CDCl<sub>3</sub>**

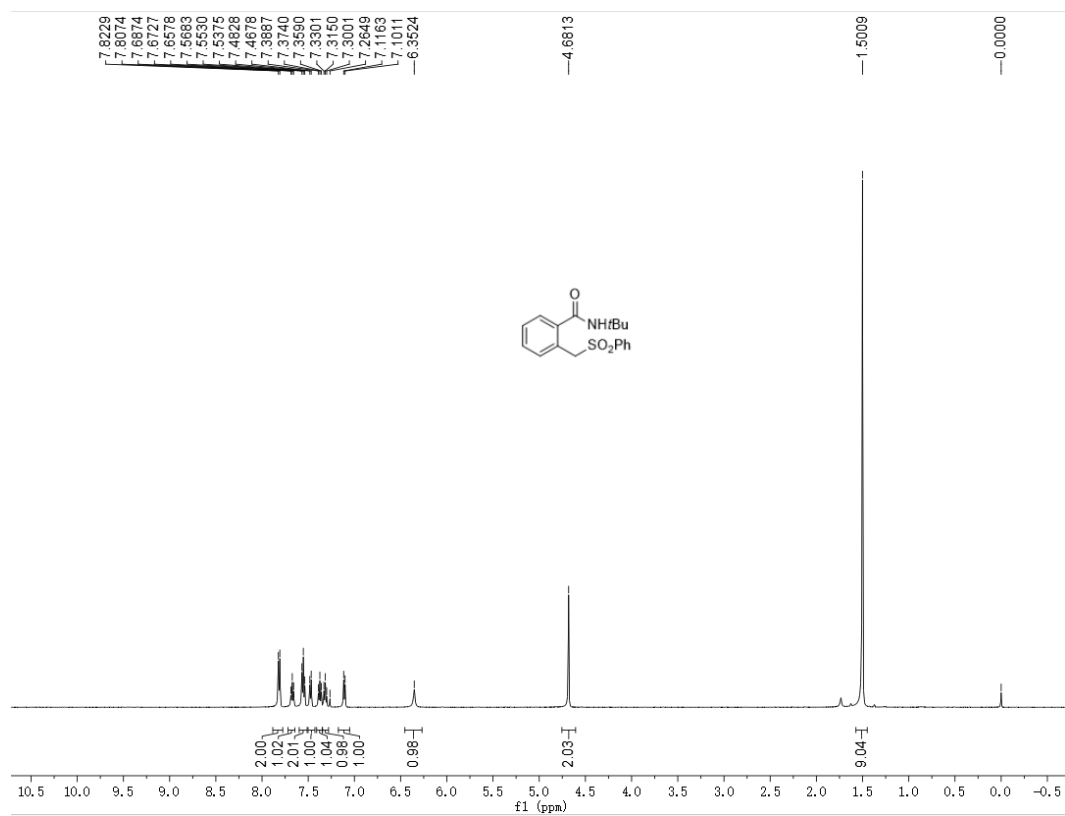

**<sup>13</sup>C{<sup>1</sup>H} NMR (126 MHz) Spectrum of 9 in CDCl<sub>3</sub>**

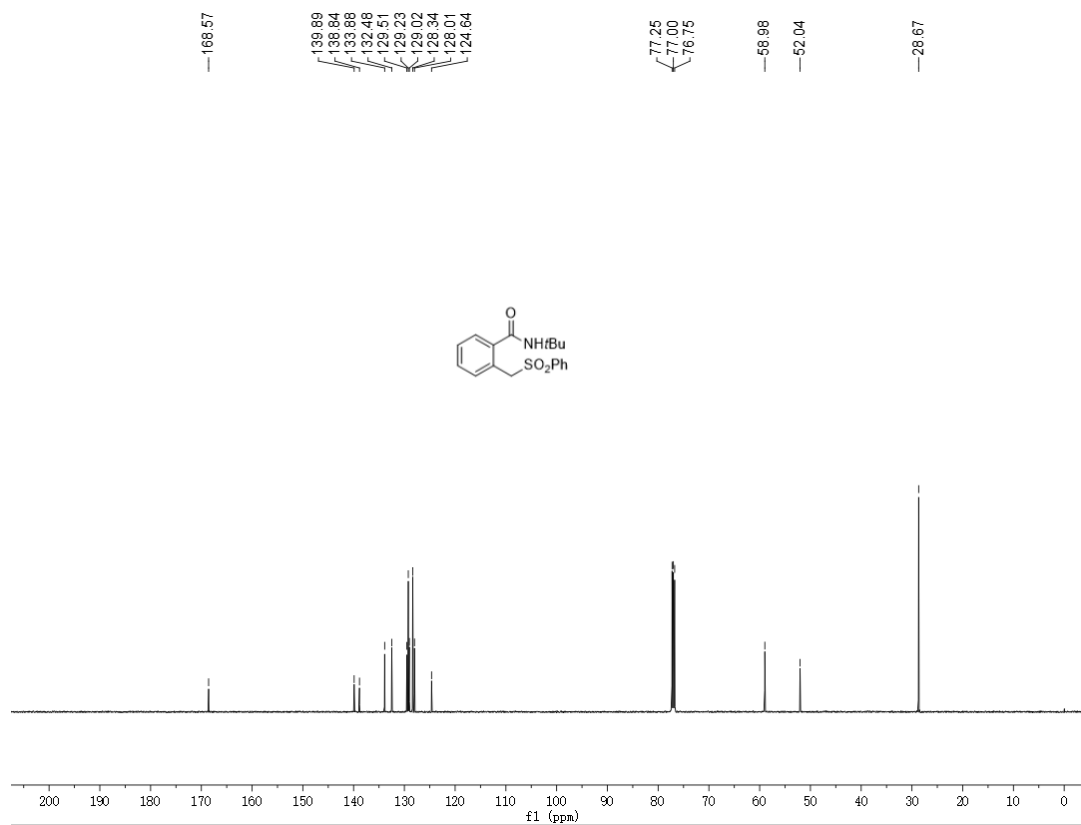

### <sup>1</sup>H NMR (400 MHz) Spectrum of 10 in CDCl<sub>3</sub>

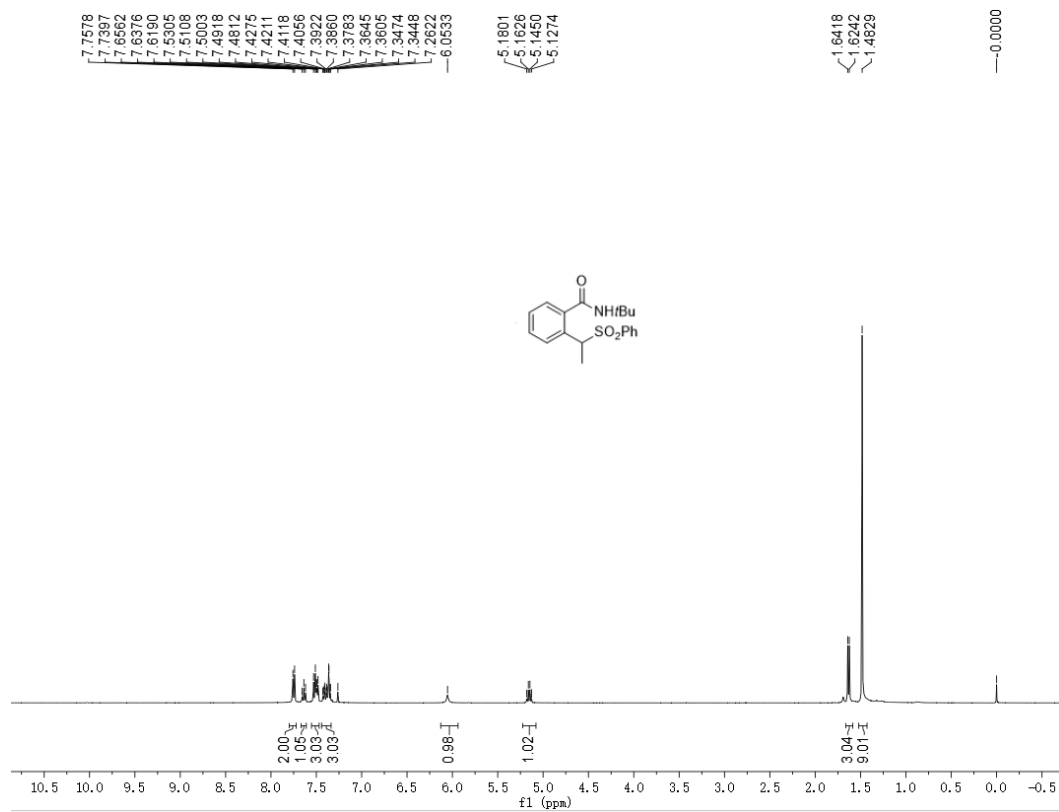

### <sup>13</sup>C{<sup>1</sup>H} NMR (101 MHz) Spectrum of 10 in CDCl<sub>3</sub>

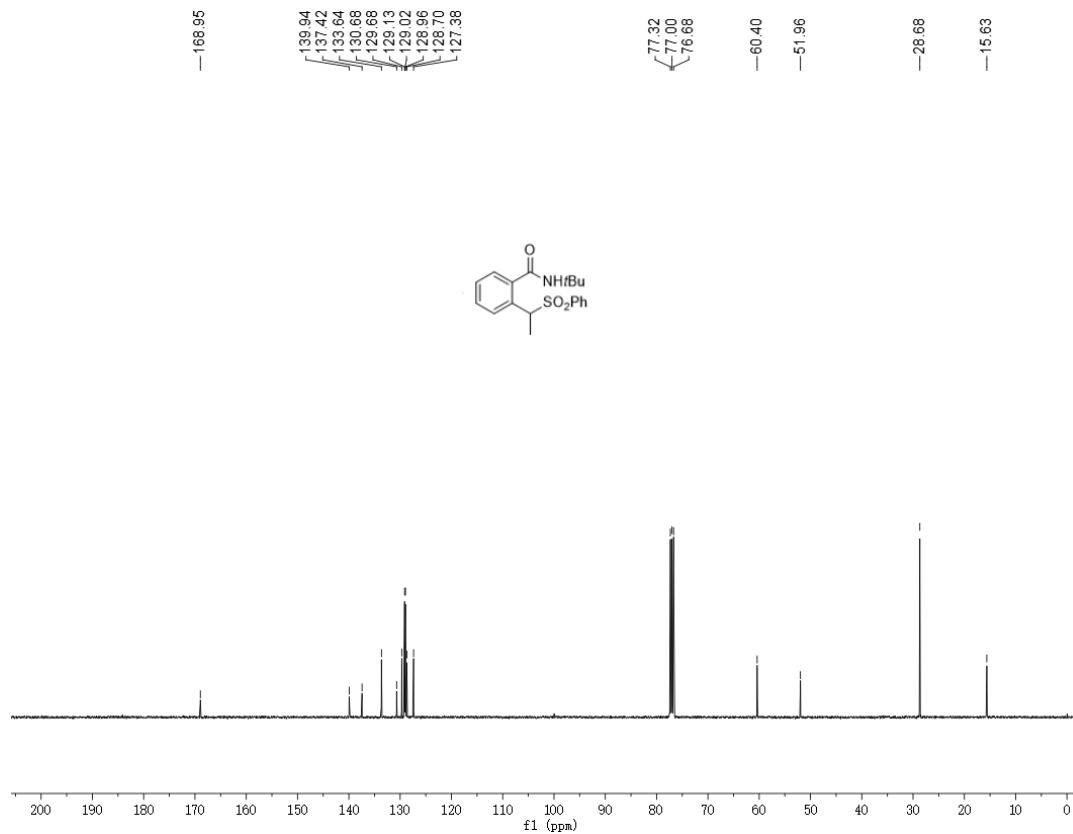



**<sup>1</sup>H NMR (400 MHz) Spectrum of 11 in CDCl<sub>3</sub>**

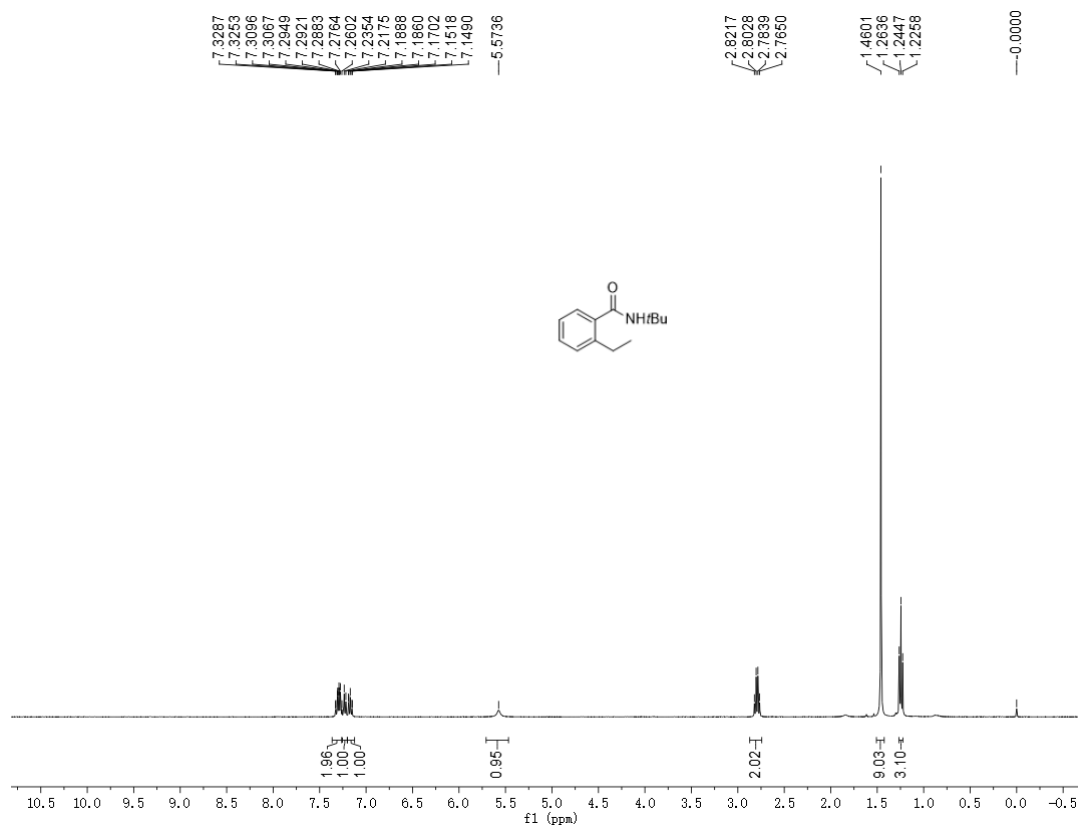

**<sup>13</sup>C{<sup>1</sup>H} NMR (101 MHz) Spectrum of 11 in CDCl<sub>3</sub>**

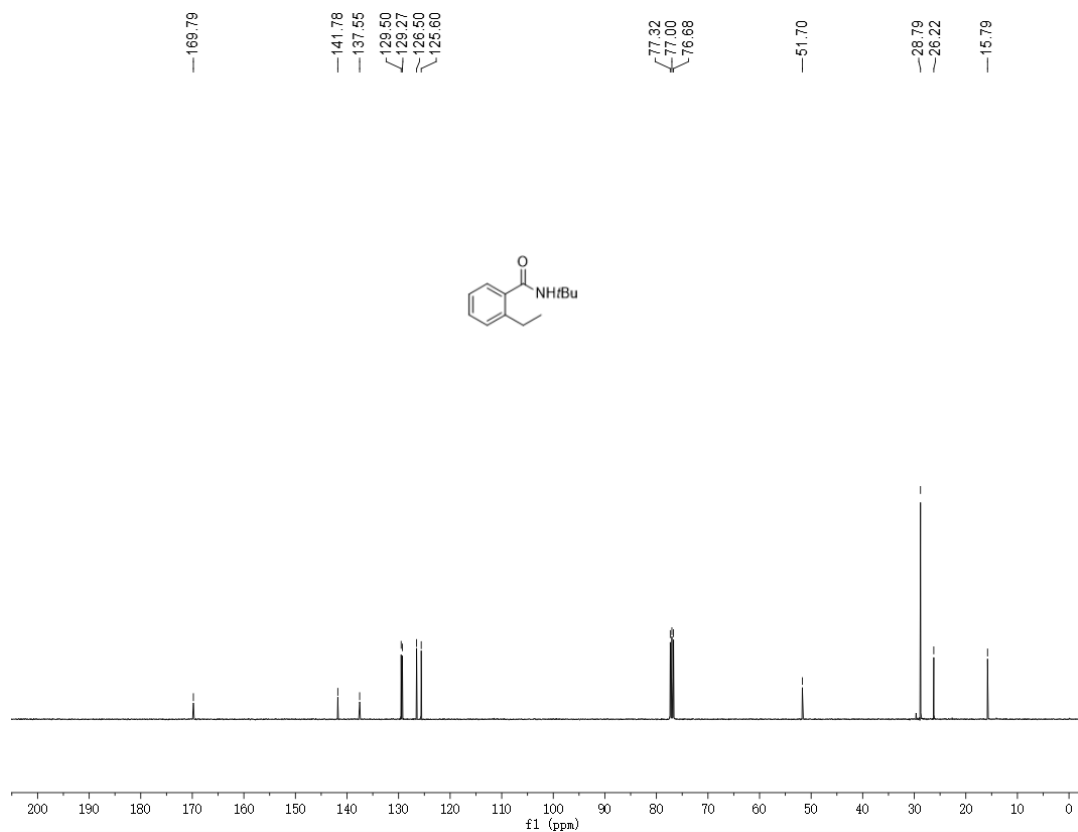

**<sup>1</sup>H NMR (400 MHz) Spectrum of 12 in CDCl<sub>3</sub>**

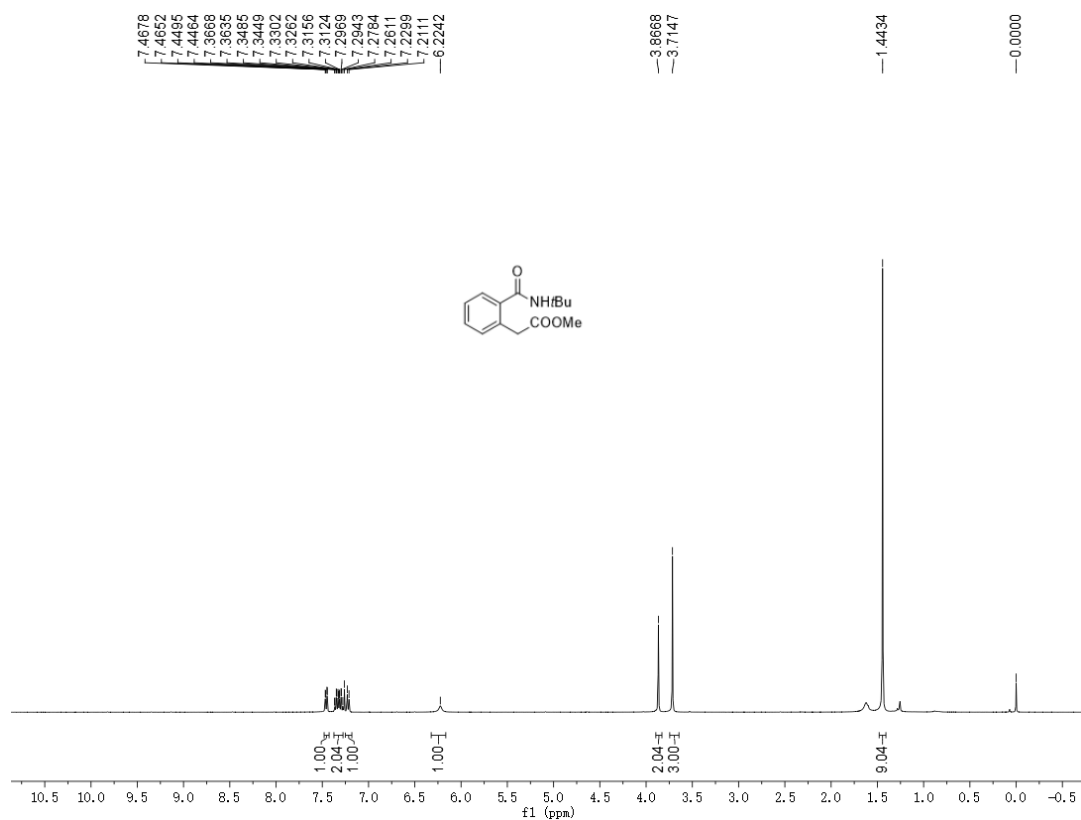

**<sup>13</sup>C{<sup>1</sup>H} NMR (101 MHz) Spectrum of 12 in CDCl<sub>3</sub>**

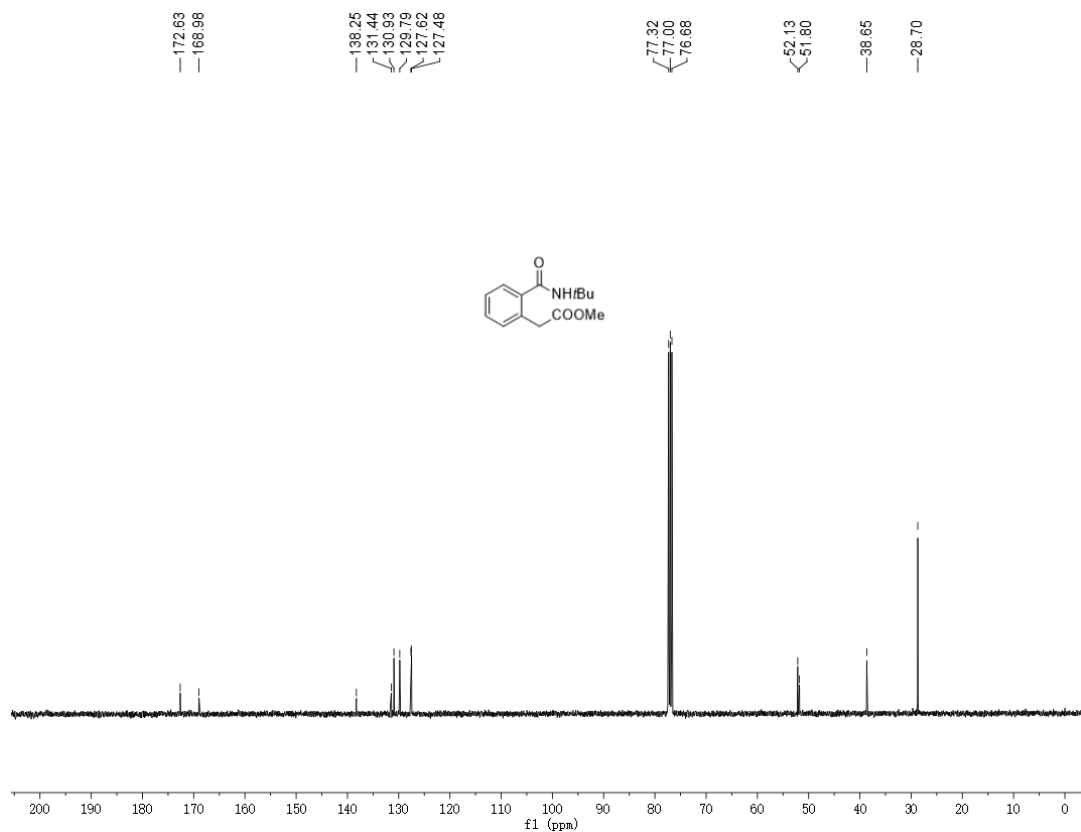

Supplement: d1ob02380b1.pdf [file d1ob02380b1.pdf]
